# Supplementary material for: Microbial Activation of the GLP-2R Mitigates Gastrointestinal Inflammation
Source: Research Square preprint supplement (doi:10.21203/rs.3.rs-6973437/v1), 2025-07-09
Supplement: Supplementary file 1 [file 2b009900515ccfb26d81825b.xlsx]

## Sheet: README
THIS SHEET CONTAINS ALL DATA FOR MICE USED IN FIGURE 3 REGARDING WT MICE CHALLENGED WITH 5FU

## Sheet: Body parameters (R)
Comments	Cage_ID	Mouse_ID	Sex	Diet	Treatment	Length	DAY-7	DAY 0	DAY 1 POST INJECTION	DAY 2 POST INJECTION	DAY 3 POST INJECTION	DAY 4 POST INJECTION	DAY 5 POST INJECTION	DAY 6 POST INJECTION
	1	101	F	CD	Saline	Day 3	19.4	19.4	20	19.5	19.8
	1	102	F	CD	Saline	Day 3	18.8	18.4	19.4	18.8	18.8
	1	103	F	CD	Saline	Day 3	19.1	21.3	21.3	21.2	20.4
	2	104	F	CD-McB	Saline	Day 3	19.7	20.2	20.7	20.8	20.6
	2	105	F	CD-McB	Saline	Day 3	19	19.1	20	19.4	19.3
	2	106	F	CD-McB	Saline	Day 3	19	20.2	19.4	19.4	19.1
	3	107	F	CD	5FU	Day 3	18.5	18.8	17.6	17.1	16.9
	3	108	F	CD	5FU	Day 3	18.5	18.4	18	17.6	17.7
	3	109	F	CD	5FU	Day 3	18.1	18.7	17.6	17.4	17.1
	4	110	F	CD-McB	5FU	Day 3	20	21.6	20.1	19.5	20.2
	4	111	F	CD-McB	5FU	Day 3	18.9	19.3	18.9	18.2	18.1
	4	112	F	CD-McB	5FU	Day 3	19.8	19.6	18.2	17.7	17.7
	5	113	F	CD	Saline	Day 3	20.3	22.4	22.4	22	21.9
	5	114	F	CD	Saline	Day 3	19.3	19.7	19.9	19.9	19.1
	5	115	F	CD	Saline	Day 3	20.9	20.9	21.4	21.3	21
	6	116	F	CD-McB	Saline	Day 3	18.5	19.2	19.9	19.9	19.4
	6	117	F	CD-McB	Saline	Day 3	18.3	19.1	19.5	19.5	19.3
	6	118	F	CD-McB	Saline	Day 3	18.8	20.9	20.5	20.4	20.7
	7	119	F	CD	5FU	Day 3	18.6	19.8	19.1	18.4	18.2
	7	120	F	CD	5FU	Day 3	18.6	18.3	17.4	17.2	16.8
	7	121	F	CD	5FU	Day 3	18.7	19.6	19.4	19.1	18.9
	8	122	F	CD-McB	5FU	Day 3	17.4	19	17.2	16.8	16.2
	8	123	F	CD-McB	5FU	Day 3	19.2	19	18.5	17.3	17.1
	8	124	F	CD-McB	5FU	Day 3	18.5	18.6	17.9	17.7	16.9
	9	125	F	CD	Saline	Day 3	17	17.5	18.2	17.8	18.4
	9	126	F	CD	Saline	Day 3	17.4	18.5	18.4	18.4	18.4
	9	127	F	CD	Saline	Day 3	18.7	20.2	19.6	19.8	19.8
	10	128	F	CD-McB	Saline	Day 3	17.9	18.7	19	18.8	18.8
	10	129	F	CD-McB	Saline	Day 3	17.2	18	18.2	18.5	18.5
	10	130	F	CD-McB	Saline	Day 3	17.5	17.3	17.8	17.7	17.7
	11	131	F	CD	5FU	Day 3	18.8	17.9	17.6	17.4	16.6
	11	132	F	CD	5FU	Day 3	17	17.5	16.8	16.5	15.9
	11	133	F	CD	5FU	Day 3	17.1	16.8	16.5	16	15.5
	12	134	F	CD-McB	5FU	Day 3	18.9	19.4	18.9	18.5	18.5
	12	135	F	CD-McB	5FU	Day 3	18.6	19.3	18.6	18	17.6
	12	136	F	CD-McB	5FU	Day 3	18.4	19.3	18.5	17.9	17.7
	13	137	F	CD	Saline	Day 6	16.8	17.8	17.1	17.7	18.1	18.4	18.5	18.7
	13	138	F	CD	Saline	Day 6	16.4	17	16.5	16.1	16.4	16.3	16.8	16.6
	13	139	F	CD	Saline	Day 6	19.3	19.1	18.7	19.9	20.1	19.7	19.8	19.8
	14	140	F	CD-McB	Saline	Day 6	17.4	18.1	17.5	17.8	18.2	18.1	18.1	18.2
	14	141	F	CD-McB	Saline	Day 6	18.2	18.7	18.4	18.2	18.6	18.8	18.9	18.8
	14	142	F	CD-McB	Saline	Day 6	18.2	18.1	18.1	18	18.4	18.4	18.9	18.7
	15	143	F	CD	5FU	Day 6	18.7	18.7	17.5	17.3	17.1	17.8	18.6	18.5
	15	144	F	CD	5FU	Day 6	21.3	21.9	20	19.3	18.6	18.9	20.4	19.9
	15	145	F	CD	5FU	Day 6	19.4	19.9	18.5	17.7	17.5	18.2	19.1	19.1
	16	146	F	CD-McB	5FU	Day 6	19.5	20.6	19.8	19.3	18.8	19.8	20.4	20.6
	16	147	F	CD-McB	5FU	Day 6	16.9	17.4	16.8	16.5	16.3	17	17.7	17.5
	16	148	F	CD-McB	5FU	Day 6	17	18	16.9	16.6	16.9	17.3	18	18.3
	17	149	F	CD	Saline	Day 6	20.7	21	21.3	20.5	20.6	21.4	20.9	21.4
	17	150	F	CD	Saline	Day 6	18.4	18.6	19.1	18.3	18.3	18.6	18.6	19
	17	151	F	CD	Saline	Day 6	17.3	17.8	18.1	17.9	18.6	19	19.2	19.2
	18	152	F	CD-McB	Saline	Day 6	17.4	18.7	18.7	18.2	18.4	18.3	18.5	18.9
	18	153	F	CD-McB	Saline	Day 6	20.5	20.4	21.8	21.6	21.8	20.9	20.6	21.3
	18	154	F	CD-McB	Saline	Day 6	18.7	18.4	18.9	19.1	19.6	18.7	18.8	19.2
	19	155	F	CD	5FU	Day 6	21.3	20.3	19.5	19.1	18	18.9	20.5	21.1
	19	156	F	CD	5FU	Day 6	18.6	18.6	17.6	17.3	16.5	17.5	17.9	19.3
	19	157	F	CD	5FU	Day 6	18.7	19.1	18.1	17.6	16.7	17.2	18.1	19
	20	158	F	CD-McB	5FU	Day 6	18.1	19.5	18.6	17.9	17.4	18.4	19.2	18.8
	20	159	F	CD-McB	5FU	Day 6	19.3	19.3	18.7	17.6	17.4	18.4	18.5	19.3
	20	160	F	CD-McB	5FU	Day 6	19.8	20.1	19.5	19.2	19.4	20	21	20.5
	21	161	F	CD	Saline	Day 6	20.2	20.4	21.3	20.9	20.5	19.7	20.4	20.6
	21	162	F	CD	Saline	Day 6	20	19.8	20.9	20	20	19.7	20.4	20.3
	21	163	F	CD	Saline	Day 6	19.6	20.6	21.4	21.5	21	20.7	21.7	22.2
	22	164	F	CD-McB	Saline	Day 6	20.2	20.7	21.1	21.3	21.2	21.2	21.5	22
	22	165	F	CD-McB	Saline	Day 6	18.5	20.1	21	21	21	21.1	20.9	20.9
	22	166	F	CD-McB	Saline	Day 6	19	19.3	20	20.2	19.9	19.7	20	20.6
	23	167	F	CD	5FU	Day 6	17.4	18.2	17.4	17.2	17.2	18.2	19	19.3
	23	168	F	CD	5FU	Day 6	17.3	18	17.5	16.8	16.4	16.8	17.9	17.7
	23	169	F	CD	5FU	Day 6	20	21.2	20.1	20.1	19.8	20.2	20.6	20.8
	24	170	F	CD-McB	5FU	Day 6	18.8	19	18	17.1	16.7	17.1	18.5	18.5
	24	171	F	CD-McB	5FU	Day 6	19.5	20	19.2	18.2	17.7	18.5	19.8	19.7
	24	172	F	CD-McB	5FU	Day 6	19.6	20.1	19.6	18.8	18.7	19.5	20.1	20.3

## Sheet: Weight gain (R)
Comments	Cage_ID	Mouse_ID	Sex	Diet	Treatment	Length	DAY 0	DAY 1 POST INJECTION	DAY 2 POST INJECTION	DAY 3 POST INJECTION	DAY 4 POST INJECTION	DAY 5 POST INJECTION	DAY 6 POST INJECTION
	1	101	F	CD	Saline	Day 3	0	0.6	0.1	0.4	-19.4	-19.4	-19.4
	1	102	F	CD	Saline	Day 3	0	1	0.4	0.4	-18.4	-18.4	-18.4
	1	103	F	CD	Saline	Day 3	0	0	-0.1	-0.9	-21.3	-21.3	-21.3
	2	104	F	CD-McB	Saline	Day 3	0	0.5	0.6	0.4	-20.2	-20.2	-20.2
	2	105	F	CD-McB	Saline	Day 3	0	0.9	0.3	0.2	-19.1	-19.1	-19.1
	2	106	F	CD-McB	Saline	Day 3	0	-0.8	-0.8	-1.1	-20.2	-20.2	-20.2
	3	107	F	CD	5FU	Day 3	0	-1.2	-1.7	-1.9	-18.8	-18.8	-18.8
	3	108	F	CD	5FU	Day 3	0	-0.4	-0.8	-0.7	-18.4	-18.4	-18.4
	3	109	F	CD	5FU	Day 3	0	-1.1	-1.3	-1.6	-18.7	-18.7	-18.7
	4	110	F	CD-McB	5FU	Day 3	0	-1.5	-2.1	-1.4	-21.6	-21.6	-21.6
	4	111	F	CD-McB	5FU	Day 3	0	-0.4	-1.1	-1.2	-19.3	-19.3	-19.3
	4	112	F	CD-McB	5FU	Day 3	0	-1.4	-1.9	-1.9	-19.6	-19.6	-19.6
	5	113	F	CD	Saline	Day 3	0	0	-0.4	-0.5	-22.4	-22.4	-22.4
	5	114	F	CD	Saline	Day 3	0	0.2	0.2	-0.6	-19.7	-19.7	-19.7
	5	115	F	CD	Saline	Day 3	0	0.5	0.4	0.1	-20.9	-20.9	-20.9
	6	116	F	CD-McB	Saline	Day 3	0	0.7	0.7	0.2	-19.2	-19.2	-19.2
	6	117	F	CD-McB	Saline	Day 3	0	0.4	0.4	0.2	-19.1	-19.1	-19.1
	6	118	F	CD-McB	Saline	Day 3	0	-0.4	-0.5	-0.2	-20.9	-20.9	-20.9
	7	119	F	CD	5FU	Day 3	0	-0.7	-1.4	-1.6	-19.8	-19.8	-19.8
	7	120	F	CD	5FU	Day 3	0	-0.9	-1.1	-1.5	-18.3	-18.3	-18.3
	7	121	F	CD	5FU	Day 3	0	-0.2	-0.5	-0.7	-19.6	-19.6	-19.6
	8	122	F	CD-McB	5FU	Day 3	0	-1.8	-2.2	-2.8	-19	-19	-19
	8	123	F	CD-McB	5FU	Day 3	0	-0.5	-1.7	-1.9	-19	-19	-19
	8	124	F	CD-McB	5FU	Day 3	0	-0.7	-0.9	-1.7	-18.6	-18.6	-18.6
	9	125	F	CD	Saline	Day 3	0	0.7	0.3	0.9	-17.5	-17.5	-17.5
	9	126	F	CD	Saline	Day 3	0	-0.1	-0.1	-0.1	-18.5	-18.5	-18.5
	9	127	F	CD	Saline	Day 3	0	-0.6	-0.4	-0.4	-20.2	-20.2	-20.2
	10	128	F	CD-McB	Saline	Day 3	0	0.3	0.1	0.1	-18.7	-18.7	-18.7
	10	129	F	CD-McB	Saline	Day 3	0	0.2	0.5	0.5	-18	-18	-18
	10	130	F	CD-McB	Saline	Day 3	0	0.5	0.4	0.4	-17.3	-17.3	-17.3
	11	131	F	CD	5FU	Day 3	0	-0.3	-0.5	-1.3	-17.9	-17.9	-17.9
	11	132	F	CD	5FU	Day 3	0	-0.7	-1	-1.6	-17.5	-17.5	-17.5
	11	133	F	CD	5FU	Day 3	0	-0.3	-0.8	-1.3	-16.8	-16.8	-16.8
	12	134	F	CD-McB	5FU	Day 3	0	-0.5	-0.9	-0.9	-19.4	-19.4	-19.4
	12	135	F	CD-McB	5FU	Day 3	0	-0.7	-1.3	-1.7	-19.3	-19.3	-19.3
	12	136	F	CD-McB	5FU	Day 3	0	-0.8	-1.4	-1.6	-19.3	-19.3	-19.3
	13	137	F	CD	Saline	Day 6	0	-0.7	-0.1	0.3	0.6	0.7	0.9
	13	138	F	CD	Saline	Day 6	0	-0.5	-0.9	-0.6	-0.7	-0.2	-0.4
	13	139	F	CD	Saline	Day 6	0	-0.4	0.8	1	0.6	0.7	0.7
	14	140	F	CD-McB	Saline	Day 6	0	-0.6	-0.3	0.1	0	0	0.1
	14	141	F	CD-McB	Saline	Day 6	0	-0.3	-0.5	-0.1	0.1	0.2	0.1
	14	142	F	CD-McB	Saline	Day 6	0	0	-0.1	0.3	0.3	0.8	0.6
	15	143	F	CD	5FU	Day 6	0	-1.2	-1.4	-1.6	-0.9	-0.1	-0.2
	15	144	F	CD	5FU	Day 6	0	-1.9	-2.6	-3.3	-3	-1.5	-2
	15	145	F	CD	5FU	Day 6	0	-1.4	-2.2	-2.4	-1.7	-0.8	-0.8
	16	146	F	CD-McB	5FU	Day 6	0	-0.8	-1.3	-1.8	-0.8	-0.2	0
	16	147	F	CD-McB	5FU	Day 6	0	-0.6	-0.9	-1.1	-0.4	0.3	0.1
	16	148	F	CD-McB	5FU	Day 6	0	-1.1	-1.4	-1.1	-0.7	0	0.3
	17	149	F	CD	Saline	Day 6	0	0.3	-0.5	-0.4	0.4	-0.1	0.4
	17	150	F	CD	Saline	Day 6	0	0.5	-0.3	-0.3	0	0	0.4
	17	151	F	CD	Saline	Day 6	0	0.3	0.1	0.8	1.2	1.4	1.4
	18	152	F	CD-McB	Saline	Day 6	0	0	-0.5	-0.3	-0.4	-0.2	0.2
	18	153	F	CD-McB	Saline	Day 6	0	1.4	1.2	1.4	0.5	0.2	0.9
	18	154	F	CD-McB	Saline	Day 6	0	0.5	0.7	1.2	0.3	0.4	0.8
	19	155	F	CD	5FU	Day 6	0	-0.8	-1.2	-2.3	-1.4	0.2	0.8
	19	156	F	CD	5FU	Day 6	0	-1	-1.3	-2.1	-1.1	-0.7	0.7
	19	157	F	CD	5FU	Day 6	0	-1	-1.5	-2.4	-1.9	-1	-0.1
	20	158	F	CD-McB	5FU	Day 6	0	-0.9	-1.6	-2.1	-1.1	-0.3	-0.7
	20	159	F	CD-McB	5FU	Day 6	0	-0.6	-1.7	-1.9	-0.9	-0.8	0
	20	160	F	CD-McB	5FU	Day 6	0	-0.6	-0.9	-0.7	-0.1	0.9	0.4
	21	161	F	CD	Saline	Day 6	0	0.9	0.5	0.1	-0.7	0	0.2
	21	162	F	CD	Saline	Day 6	0	1.1	0.2	0.2	-0.1	0.6	0.5
	21	163	F	CD	Saline	Day 6	0	0.8	0.9	0.4	0.1	1.1	1.6
	22	164	F	CD-McB	Saline	Day 6	0	0.4	0.6	0.5	0.5	0.8	1.3
	22	165	F	CD-McB	Saline	Day 6	0	0.9	0.9	0.9	1	0.8	0.8
	22	166	F	CD-McB	Saline	Day 6	0	0.7	0.9	0.6	0.4	0.7	1.3
	23	167	F	CD	5FU	Day 6	0	-0.8	-1	-1	0	0.8	1.1
	23	168	F	CD	5FU	Day 6	0	-0.5	-1.2	-1.6	-1.2	-0.1	-0.3
	23	169	F	CD	5FU	Day 6	0	-1.1	-1.1	-1.4	-1	-0.6	-0.4
	24	170	F	CD-McB	5FU	Day 6	0	-1	-1.9	-2.3	-1.9	-0.5	-0.5
	24	171	F	CD-McB	5FU	Day 6	0	-0.8	-1.8	-2.3	-1.5	-0.2	-0.3
	24	172	F	CD-McB	5FU	Day 6	0	-0.5	-1.3	-1.4	-0.6	0	0.2

## Sheet: WeightPct (R)
Comments	Cage_ID	Mouse_ID	Sex	Diet	Treatment	Length	DAY 0	DAY 1 POST INJECTION	DAY 2 POST INJECTION	DAY 3 POST INJECTION	DAY 4 POST INJECTION	DAY 5 POST INJECTION	DAY 6 POST INJECTION
	1	101	F	CD	Saline	Day 3	0	3.09278	0.515464	2.06186
	1	102	F	CD	Saline	Day 3	0	5.43478	2.17391	2.17391
	1	103	F	CD	Saline	Day 3	0	0	-0.469484	-4.22535
	2	104	F	CD-McB	Saline	Day 3	0	2.47525	2.9703	1.9802
	2	105	F	CD-McB	Saline	Day 3	0	4.71204	1.57068	1.04712
	2	106	F	CD-McB	Saline	Day 3	0	-3.9604	-3.9604	-5.44554
	3	107	F	CD	5FU	Day 3	0	-6.38298	-9.04255	-10.1064
	3	108	F	CD	5FU	Day 3	0	-2.17391	-4.34783	-3.80435
	3	109	F	CD	5FU	Day 3	0	-5.88235	-6.95187	-8.55615
	4	110	F	CD-McB	5FU	Day 3	0	-6.94444	-9.72222	-6.48148
	4	111	F	CD-McB	5FU	Day 3	0	-2.07254	-5.69948	-6.21762
	4	112	F	CD-McB	5FU	Day 3	0	-7.14286	-9.69388	-9.69388
	5	113	F	CD	Saline	Day 3	0	0	-1.78571	-2.23214
	5	114	F	CD	Saline	Day 3	0	1.01523	1.01523	-3.04569
	5	115	F	CD	Saline	Day 3	0	2.39234	1.91388	0.478469
	6	116	F	CD-McB	Saline	Day 3	0	3.64583	3.64583	1.04167
	6	117	F	CD-McB	Saline	Day 3	0	2.09424	2.09424	1.04712
	6	118	F	CD-McB	Saline	Day 3	0	-1.91388	-2.39234	-0.956938
	7	119	F	CD	5FU	Day 3	0	-3.53535	-7.07071	-8.08081
	7	120	F	CD	5FU	Day 3	0	-4.91803	-6.01093	-8.19672
	7	121	F	CD	5FU	Day 3	0	-1.02041	-2.55102	-3.57143
	8	122	F	CD-McB	5FU	Day 3	0	-9.47368	-11.5789	-14.7368
	8	123	F	CD-McB	5FU	Day 3	0	-2.63158	-8.94737	-10
	8	124	F	CD-McB	5FU	Day 3	0	-3.76344	-4.83871	-9.13978
	9	125	F	CD	Saline	Day 3	0	4	1.71429	5.14286
	9	126	F	CD	Saline	Day 3	0	-0.540541	-0.540541	-0.540541
	9	127	F	CD	Saline	Day 3	0	-2.9703	-1.9802	-1.9802
	10	128	F	CD-McB	Saline	Day 3	0	1.60428	0.534759	0.534759
	10	129	F	CD-McB	Saline	Day 3	0	1.11111	2.77778	2.77778
	10	130	F	CD-McB	Saline	Day 3	0	2.89017	2.31214	2.31214
	11	131	F	CD	5FU	Day 3	0	-1.67598	-2.7933	-7.26257
	11	132	F	CD	5FU	Day 3	0	-4	-5.71429	-9.14286
	11	133	F	CD	5FU	Day 3	0	-1.78571	-4.7619	-7.7381
	12	134	F	CD-McB	5FU	Day 3	0	-2.57732	-4.63918	-4.63918
	12	135	F	CD-McB	5FU	Day 3	0	-3.62694	-6.73575	-8.80829
	12	136	F	CD-McB	5FU	Day 3	0	-4.14508	-7.25389	-8.29016
	13	137	F	CD	Saline	Day 6	0	-3.93258	-0.561798	1.68539	3.37079	3.93258	5.05618
	13	138	F	CD	Saline	Day 6	0	-2.94118	-5.29412	-3.52941	-4.11765	-1.17647	-2.35294
	13	139	F	CD	Saline	Day 6	0	-2.09424	4.18848	5.2356	3.14136	3.66492	3.66492
	14	140	F	CD-McB	Saline	Day 6	0	-3.31492	-1.65746	0.552486	0	0	0.552486
	14	141	F	CD-McB	Saline	Day 6	0	-1.60428	-2.6738	-0.534759	0.534759	1.06952	0.534759
	14	142	F	CD-McB	Saline	Day 6	0	0	-0.552486	1.65746	1.65746	4.41989	3.31492
	15	143	F	CD	5FU	Day 6	0	-6.41711	-7.48663	-8.55615	-4.81283	-0.534759	-1.06952
	15	144	F	CD	5FU	Day 6	0	-8.6758	-11.8721	-15.0685	-13.6986	-6.84932	-9.13242
	15	145	F	CD	5FU	Day 6	0	-7.03518	-11.0553	-12.0603	-8.54271	-4.0201	-4.0201
	16	146	F	CD-McB	5FU	Day 6	0	-3.8835	-6.31068	-8.73786	-3.8835	-0.970874	0
	16	147	F	CD-McB	5FU	Day 6	0	-3.44828	-5.17241	-6.32184	-2.29885	1.72414	0.574713
	16	148	F	CD-McB	5FU	Day 6	0	-6.11111	-7.77778	-6.11111	-3.88889	0	1.66667
	17	149	F	CD	Saline	Day 6	0	1.42857	-2.38095	-1.90476	1.90476	-0.47619	1.90476
	17	150	F	CD	Saline	Day 6	0	2.68817	-1.6129	-1.6129	0	0	2.15054
	17	151	F	CD	Saline	Day 6	0	1.68539	0.561798	4.49438	6.74157	7.86517	7.86517
	18	152	F	CD-McB	Saline	Day 6	0	0	-2.6738	-1.60428	-2.13904	-1.06952	1.06952
	18	153	F	CD-McB	Saline	Day 6	0	6.86275	5.88235	6.86275	2.45098	0.980392	4.41176
	18	154	F	CD-McB	Saline	Day 6	0	2.71739	3.80435	6.52174	1.63043	2.17391	4.34783
	19	155	F	CD	5FU	Day 6	0	-3.94089	-5.91133	-11.33	-6.89655	0.985222	3.94089
	19	156	F	CD	5FU	Day 6	0	-5.37634	-6.98925	-11.2903	-5.91398	-3.76344	3.76344
	19	157	F	CD	5FU	Day 6	0	-5.2356	-7.8534	-12.5654	-9.94764	-5.2356	-0.52356
	20	158	F	CD-McB	5FU	Day 6	0	-4.61538	-8.20513	-10.7692	-5.64103	-1.53846	-3.58974
	20	159	F	CD-McB	5FU	Day 6	0	-3.10881	-8.80829	-9.84456	-4.66321	-4.14508	0
	20	160	F	CD-McB	5FU	Day 6	0	-2.98507	-4.47761	-3.48259	-0.497512	4.47761	1.99005
	21	161	F	CD	Saline	Day 6	0	4.41176	2.45098	0.490196	-3.43137	0	0.980392
	21	162	F	CD	Saline	Day 6	0	5.55556	1.0101	1.0101	-0.505051	3.0303	2.52525
	21	163	F	CD	Saline	Day 6	0	3.8835	4.36893	1.94175	0.485437	5.33981	7.76699
	22	164	F	CD-McB	Saline	Day 6	0	1.93237	2.89855	2.41546	2.41546	3.86473	6.28019
	22	165	F	CD-McB	Saline	Day 6	0	4.47761	4.47761	4.47761	4.97512	3.9801	3.9801
	22	166	F	CD-McB	Saline	Day 6	0	3.62694	4.66321	3.10881	2.07254	3.62694	6.73575
	23	167	F	CD	5FU	Day 6	0	-4.3956	-5.49451	-5.49451	0	4.3956	6.04396
	23	168	F	CD	5FU	Day 6	0	-2.77778	-6.66667	-8.88889	-6.66667	-0.555556	-1.66667
	23	169	F	CD	5FU	Day 6	0	-5.18868	-5.18868	-6.60377	-4.71698	-2.83019	-1.88679
	24	170	F	CD-McB	5FU	Day 6	0	-5.26316	-10	-12.1053	-10	-2.63158	-2.63158
	24	171	F	CD-McB	5FU	Day 6	0	-4	-9	-11.5	-7.5	-1	-1.5
	24	172	F	CD-McB	5FU	Day 6	0	-2.48756	-6.46766	-6.96517	-2.98507	0	0.995025

## Sheet: Necropsy (R)
Comments	Cage_ID	Mouse_ID	Sex	Diet	Treatment	Length	Spleen	Liver	Cecum	Small Intestine	Colon	Colon length	Colon length w/o carnoy	SpleenToBW	LiverToBW	CecumToBW	SmallToBW	ColonToBW	ColonIndex
	1	101	F	CD	Saline	Day 3	0.063	0.87	0.248	0.8	0.092	6.2	5.1	0.318182	4.39394	1.25253	4.0404	0.464646	18.0392
	1	102	F	CD	Saline	Day 3	0.082	0.827	0.199	0.683	0.079	5.2	4.1	0.43617	4.39894	1.05851	3.63298	0.420213	19.2683
	1	103	F	CD	Saline	Day 3	0.077	0.816	0.193	0.969	0.08	5.5	4.5	0.377451	4	0.946078	4.75	0.392157	17.7778
	2	104	F	CD-McB	Saline	Day 3	0.09	0.966	0.333	0.893	0.116	7.5	6.4	0.436893	4.68932	1.6165	4.33495	0.563107	18.125
	2	105	F	CD-McB	Saline	Day 3	0.107	0.711	0.257	0.793	0.096	6.3	5.2	0.554404	3.68394	1.33161	4.10881	0.497409	18.4615
	2	106	F	CD-McB	Saline	Day 3	0.086	0.855	0.271	0.926	0.099	6.2	5.1	0.450262	4.47644	1.41885	4.84817	0.518325	19.4118
	3	107	F	CD	5FU	Day 3	0.039	0.87	0.223	0.63	0.1	5.7	4.6	0.230769	5.14793	1.31953	3.72781	0.591716	21.7391
	3	108	F	CD	5FU	Day 3	0.039	0.865	0.144	0.563	0.102	4.7	3.8	0.220339	4.88701	0.813559	3.18079	0.576271	26.8421
	3	109	F	CD	5FU	Day 3	0.033	0.837	0.156	0.573	0.105	6	5	0.192982	4.89474	0.912281	3.35088	0.614035	21
	4	110	F	CD-McB	5FU	Day 3	0.047	0.982	0.355	0.728	0.111	6.2	5.1	0.232673	4.86139	1.75743	3.60396	0.549505	21.7647
	4	111	F	CD-McB	5FU	Day 3	0.045	0.857	0.25	0.678	0.132	6.8	5.7	0.248619	4.73481	1.38122	3.74586	0.729282	23.1579
	4	112	F	CD-McB	5FU	Day 3	0.049	0.894	0.367	0.721	0.116	6.7	5.7	0.276836	5.05085	2.07345	4.07345	0.655367	20.3509
	5	113	F	CD	Saline	Day 3	0.065	0.971	0.227	0.813	0.092	6.1	5.2	0.296804	4.43379	1.03653	3.71233	0.420091	17.6923
	5	114	F	CD	Saline	Day 3	0.068	0.873	0.233	0.713	0.09	6.2	5.1	0.356021	4.57068	1.2199	3.73298	0.471204	17.6471
	5	115	F	CD	Saline	Day 3	0.075	0.842	0.185	0.724	0.095	6	5	0.357143	4.00952	0.880952	3.44762	0.452381	19
	6	116	F	CD-McB	Saline	Day 3	0.097	0.867	0.309	0.83	0.092	6.5	5.5	0.5	4.46907	1.59278	4.27835	0.474227	16.7273
	6	117	F	CD-McB	Saline	Day 3	0.078	0.934	0.241	0.812	0.094	5.9	4.8	0.404145	4.83938	1.2487	4.20725	0.487047	19.5833
	6	118	F	CD-McB	Saline	Day 3	0.082	0.982	0.317	0.935	0.087	5.9	4.8	0.396135	4.74396	1.5314	4.51691	0.42029	18.125
	7	119	F	CD	5FU	Day 3	0.037	0.963	0.207	0.661	0.102	5.6	4.5	0.203297	5.29121	1.13736	3.63187	0.56044	22.6667
	7	120	F	CD	5FU	Day 3	0.033	0.793	0.204	0.57	0.091	4.8	3.8	0.196429	4.72024	1.21429	3.39286	0.541667	23.9474
	7	121	F	CD	5FU	Day 3	0.032	0.874	0.211	0.624	0.096	5.7	4.7	0.169312	4.62434	1.1164	3.30159	0.507937	20.4255
	8	122	F	CD-McB	5FU	Day 3	0.043	0.804	0.312	0.655	0.097	5.6	4.5	0.265432	4.96296	1.92593	4.04321	0.598765	21.5556
	8	123	F	CD-McB	5FU	Day 3	0.041	0.845	0.442	0.74	0.087	5.6	4.6	0.239766	4.94152	2.5848	4.32749	0.508772	18.913
	8	124	F	CD-McB	5FU	Day 3	0.044	0.812	0.245	0.693	0.109	6.2	5.1	0.260355	4.80473	1.4497	4.10059	0.64497	21.3725
	9	125	F	CD	Saline	Day 3	0.054	0.818	0.302	0.678	0.085	6.3	5.3	0.293478	4.44565	1.6413	3.68478	0.461957	16.0377
	9	126	F	CD	Saline	Day 3	0.076	0.794	0.247	0.695	0.103	6.3	5.2	0.413043	4.31522	1.34239	3.77717	0.559783	19.8077
	9	127	F	CD	Saline	Day 3	0.078	0.789	0.203	0.698	0.074	6.1	5	0.393939	3.98485	1.02525	3.52525	0.373737	14.8
	10	128	F	CD-McB	Saline	Day 3	0.069	0.746	0.277	0.865	0.087	6	5	0.367021	3.96809	1.4734	4.60106	0.462766	17.4
	10	129	F	CD-McB	Saline	Day 3	0.066	0.807	0.212	0.818	0.091	5.4	4.3	0.356757	4.36216	1.14595	4.42162	0.491892	21.1628
	10	130	F	CD-McB	Saline	Day 3	0.075	0.731	0.243	0.794	0.087	6.5	5.4	0.423729	4.12994	1.37288	4.48588	0.491525	16.1111
	11	131	F	CD	5FU	Day 3	0.036	0.812	0.209	0.525	0.087	5	4	0.216867	4.89157	1.25904	3.16265	0.524096	21.75
	11	132	F	CD	5FU	Day 3	0.031	0.676	0.156	0.514	0.09	5	4	0.194969	4.25157	0.981132	3.2327	0.566038	22.5
	11	133	F	CD	5FU	Day 3	0.031	0.665	0.18	0.515	0.092	5.2	4.2	0.2	4.29032	1.16129	3.32258	0.593548	21.9048
	12	134	F	CD-McB	5FU	Day 3	0.04	0.882	0.278	0.605	0.099	6	5	0.216216	4.76757	1.5027	3.27027	0.535135	19.8
	12	135	F	CD-McB	5FU	Day 3	0.061	0.762	0.212	0.622	0.111	5.4	4.3	0.346591	4.32955	1.20455	3.53409	0.630682	25.814
	12	136	F	CD-McB	5FU	Day 3	0.041	0.742	0.22	0.66	0.114	6.2	5.1	0.231638	4.19209	1.24294	3.72881	0.644068	22.3529
	13	137	F	CD	Saline	Day 6	0.064	0.797	0.269	0.694	0.077	5.8	4.8	0.353591	4.40331	1.48619	3.83425	0.425414	16.0417
	13	138	F	CD	Saline	Day 6	0.06	0.679	0.224	0.619	0.076	5.6	4.6	0.365854	4.14024	1.36585	3.77439	0.463415	16.5217
	13	139	F	CD	Saline	Day 6	0.056	0.815	0.206	0.677	0.086	6.4	5.3	0.278607	4.05473	1.02488	3.36816	0.427861	16.2264
	14	140	F	CD-McB	Saline	Day 6	0.075	0.842	0.248	0.798	0.075	5.6	4.5	0.412088	4.62637	1.36264	4.38462	0.412088	16.6667
	14	141	F	CD-McB	Saline	Day 6	0.077	0.846	0.23	0.745	0.084	6	4.9	0.413978	4.54839	1.23656	4.00538	0.451613	17.1429
	14	142	F	CD-McB	Saline	Day 6	0.083	0.839	0.243	0.826	0.085	5.8	4.7	0.451087	4.55978	1.32065	4.48913	0.461957	18.0851
	15	143	F	CD	5FU	Day 6	0.045	1.19	0.277	0.742	0.114	7	6	0.263158	6.95906	1.61988	4.33918	0.666667	19
	15	144	F	CD	5FU	Day 6	0.042	1.128	0.268	0.792	0.1	7.3	6.2	0.225806	6.06452	1.44086	4.25806	0.537634	16.129
	15	145	F	CD	5FU	Day 6	0.04	1.16	0.299	0.813	0.085	6.9	5.9	0.228571	6.62857	1.70857	4.64571	0.485714	14.4068
	16	146	F	CD-McB	5FU	Day 6	0.046	1.218	0.453	1.043	0.125	6.6	5.5	0.244681	6.47872	2.40957	5.54787	0.664894	22.7273
	16	147	F	CD-McB	5FU	Day 6	0.046	1.083	0.247	0.904	0.083	5.7	4.7	0.282209	6.64417	1.51534	5.54601	0.509202	17.6596
	16	148	F	CD-McB	5FU	Day 6	0.052	1.196	0.267	0.806	0.107	6.6	5.5	0.307692	7.07692	1.57988	4.76923	0.633136	19.4545
	17	149	F	CD	Saline	Day 6	0.076	0.836	0.202	0.722	0.088	6.8	5.7	0.368932	4.05825	0.980583	3.50485	0.427184	15.4386
	17	150	F	CD	Saline	Day 6	0.076	0.777	0.215	0.749	0.073	6.6	5.7	0.415301	4.2459	1.17486	4.0929	0.398907	12.807
	17	151	F	CD	Saline	Day 6	0.061	0.762	0.222	0.716	0.08	6.5	5.5	0.327957	4.09677	1.19355	3.84946	0.430108	14.5455
	18	152	F	CD-McB	Saline	Day 6	0.089	0.784	0.298	0.883	0.085	5.5	4.5	0.483696	4.26087	1.61957	4.79891	0.461957	18.8889
	18	153	F	CD-McB	Saline	Day 6	0.09	1.038	0.218		0.1	7.9	6.9	0.412844	4.76147	1		0.458716	14.4928
	18	154	F	CD-McB	Saline	Day 6	0.103	0.683	0.332	0.783	0.088	6.2	5.1	0.52551	3.48469	1.69388	3.9949	0.44898	17.2549
	19	155	F	CD	5FU	Day 6	0.042	1.428	0.306	0.918	0.116	7	6	0.233333	7.93333	1.7	5.1	0.644444	19.3333
	19	156	F	CD	5FU	Day 6	0.034	1.28	0.374	0.827	0.088	5.8	4.8	0.206061	7.75758	2.26667	5.01212	0.533333	18.3333
	19	157	F	CD	5FU	Day 6	0.032	1.242	0.312	0.84	0.099	6.2	5.1	0.191617	7.43713	1.86826	5.02994	0.592814	19.4118
	20	158	F	CD-McB	5FU	Day 6	0.052	1.155	0.351	1.099	0.098	5.8	4.8	0.298851	6.63793	2.01724	6.31609	0.563218	20.4167
	20	159	F	CD-McB	5FU	Day 6	0.046	1.245	0.38	0.982	0.09	6	5	0.264368	7.15517	2.18391	5.64368	0.517241	18
	20	160	F	CD-McB	5FU	Day 6	0.048	1.357	0.335	0.994	0.112	6.9	5.9	0.247423	6.99485	1.7268	5.12371	0.57732	18.9831
	21	161	F	CD	Saline	Day 6	0.083	0.991	0.279	0.701	0.072	7.3	6.3	0.404878	4.83415	1.36098	3.41951	0.35122	11.4286
	21	162	F	CD	Saline	Day 6	0.067	0.897	0.23	0.673	0.085	6.5	5.4	0.335	4.485	1.15	3.365	0.425	15.7407
	21	163	F	CD	Saline	Day 6	0.072	1.123	0.23	0.783	0.094	6.7	5.6	0.342857	5.34762	1.09524	3.72857	0.447619	16.7857
	22	164	F	CD-McB	Saline	Day 6	0.081	0.956	0.357	0.978	0.086	6.1	5	0.382075	4.50943	1.68396	4.61321	0.40566	17.2
	22	165	F	CD-McB	Saline	Day 6	0.112	0.782	0.372	1.087	0.1	6.7	5.6	0.533333	3.72381	1.77143	5.17619	0.47619	17.8571
	22	166	F	CD-McB	Saline	Day 6	0.083	0.905	0.375	0.852	0.091	6.8	5.7	0.417085	4.54774	1.88442	4.28141	0.457286	15.9649
	23	167	F	CD	5FU	Day 6	0.043	1.207	0.234	0.751	0.107	6	5	0.25	7.01744	1.36047	4.36628	0.622093	21.4
	23	168	F	CD	5FU	Day 6	0.038	1.037	0.177	0.723	0.087	6	4.9	0.231707	6.32317	1.07927	4.40854	0.530488	17.7551
	23	169	F	CD	5FU	Day 6	0.04	1.117	0.25	0.865	0.11	6.9	5.9	0.20202	5.64141	1.26263	4.36869	0.555556	18.6441
	24	170	F	CD-McB	5FU	Day 6	0.04	1.235	0.347	0.95	0.113	6.6	5.5	0.239521	7.39521	2.07784	5.68862	0.676647	20.5455
	24	171	F	CD-McB	5FU	Day 6	0.049	1.23	0.342	0.939	0.113	7.1	6	0.276836	6.94915	1.9322	5.30508	0.638418	18.8333
	24	172	F	CD-McB	5FU	Day 6	0.045	1.277	0.477	1.036	0.123	6.9	5.9	0.240642	6.82888	2.5508	5.54011	0.657754	20.8475

## Sheet: Histo
Comments	Cage_ID	Mouse_ID	Sex	Diet	Treatment	Length	Duo - villus	Duo - Crypt	Jej - Villus	Jej - Crypt	Ile - Villus	Ile - Crypt	Colon - Crypt
	1	101	F	CD	Saline	Day 3	574.764	102.555	369.26	102.658
	1	102	F	CD	Saline	Day 3	554.8	98.735	383.46	104.346
	1	103	F	CD	Saline	Day 3	535.275	102.853	343.941	101.691
	2	104	F	CD-McB	Saline	Day 3	624.059	139.466	369.524	113.99
	2	105	F	CD-McB	Saline	Day 3	731.705	128.867	407.812	107.936
	2	106	F	CD-McB	Saline	Day 3			417.864	131.881	287.988	125.419	161.705
	3	107	F	CD	5FU	Day 3	379.156	110.564	269.787	93.976	174.249	85.563	174.811
	3	108	F	CD	5FU	Day 3	374.772	104.197	245.533	100.252	167.798	90.103
	3	109	F	CD	5FU	Day 3	330.631	100.218	268.927	99.529	170.385	89.1087	135.602
	4	110	F	CD-McB	5FU	Day 3	428.313	144.947	300.577	134.836	231.108	121.683	152.229
	4	111	F	CD-McB	5FU	Day 3					207.274	110.601	177.052
	4	112	F	CD-McB	5FU	Day 3	446.657	134.51	289.976	127.125	225.745	120.15	184.668
	5	113	F	CD	Saline	Day 3	533.001	104.292	361.339	97.2133	248.794	96.7433	183.421
	5	114	F	CD	Saline	Day 3	522.79	102.522	370.126	99.5823	243.105	101.49	175.679
	5	115	F	CD	Saline	Day 3	599.069	99.6183	319.267	97.515	290.882	100.743	175.418
	6	116	F	CD-McB	Saline	Day 3	566.648	128.74	376.503	120.968	232.754	96.0997	173.014
	6	117	F	CD-McB	Saline	Day 3	754.674	129.028	400.32	127.396	276.025	124.142	183.193
	6	118	F	CD-McB	Saline	Day 3	767.811	133.16	472.124	127.611	290.826	121.919	185.277
	7	119	F	CD	5FU	Day 3	400.537	107.112	270.09	102.994	176.238	84.375	169.508
	7	120	F	CD	5FU	Day 3	341.842	98.7707	269.231	81.0583	160.44	98.0223	171.503
	7	121	F	CD	5FU	Day 3	402.075	112.554	247.686	102.149	160.972	76.6387	135.272
	8	122	F	CD-McB	5FU	Day 3					256.86	108.233	174.746
	8	123	F	CD-McB	5FU	Day 3	421.483	129.946	296.9	118.001	221.688	138.803	135.524
	8	124	F	CD-McB	5FU	Day 3	439.232	131.772	311.335	121.854	215.961		206.667
	9	125	F	CD	Saline	Day 3	532.649	92.285	383.564	95.6923	216.479	82.025	171.374
	9	126	F	CD	Saline	Day 3	441.053	106.665	436.357	106.834	276.204	100.82	161.544
	9	127	F	CD	Saline	Day 3	606.367	103.937	390.565	95.603	233.823	85.934	150.724
	10	128	F	CD-McB	Saline	Day 3	672.166	132.853	433.311	125.854
	10	129	F	CD-McB	Saline	Day 3	692.191	131.514	417.364	121.925			173.389
	10	130	F	CD-McB	Saline	Day 3	711.238	130.614	484.555	129.597	260.096	106.216	183.194
	11	131	F	CD	5FU	Day 3	335.839	98.8533	238.313	101.45	159.062	85.8373	165.447
	11	132	F	CD	5FU	Day 3	395.695	114.684	258.875	100.146	153.233	71.0997	157.562
	11	133	F	CD	5FU	Day 3	394.273	103.64	280.682	102.091	177.503	89.8977	161.71
	12	134	F	CD-McB	5FU	Day 3	435.992	139.493	335.91	132.412	193.749	107.509	159.804
	12	135	F	CD-McB	5FU	Day 3	474.979	133.697	319.091	138.689	214.859	105.159	194.289
	12	136	F	CD-McB	5FU	Day 3	419.007	138.313			199.489	118.48	169.291
	13	137	F	CD	Saline	Day 6	520.655	95.598	360.423	83.5313	266.487	98.2217	157.35
	13	138	F	CD	Saline	Day 6	507.651	88.511	346.99	101.513	239.345	99.5153	176.862
	13	139	F	CD	Saline	Day 6	567.142	83.652			246.99	90.2947	167.794
	14	140	F	CD-McB	Saline	Day 6	627.583	130.809	420.914	132.02	275.181	119.699	161.664
	14	141	F	CD-McB	Saline	Day 6	567.588	124.184	403.788	127.047	258.725	120.547	146.637
	14	142	F	CD-McB	Saline	Day 6	729.282	126.951	390.284	123.161	249.395	99.2557	163.373
	15	143	F	CD	5FU	Day 6	578.121	121.114	454.438	123.339	303.827	123.897	169.547
	15	144	F	CD	5FU	Day 6	694.771	124.818	379.13	129.355	257.351	145.68	169.905
	15	145	F	CD	5FU	Day 6	582.08	137.067	352.367	120.77	312.389	126.878	187.182
	16	146	F	CD-McB	5FU	Day 6	583.434	126.445	522.02	130.743	296.584	127.336	158.271
	16	147	F	CD-McB	5FU	Day 6	650.363	120.803	388.934	124.437	283.125	112.676	185.936
	16	148	F	CD-McB	5FU	Day 6	725.888	120.823	416.073	120.016	269.402	111.505	181.202
	17	149	F	CD	Saline	Day 6	661.329	104.509	343.416	111.298	236.411	87.207	182.73
	17	150	F	CD	Saline	Day 6	583.151	108.366	340.934	98.9693			162.054
	17	151	F	CD	Saline	Day 6	624.24	97.605	389.491	102.119	243.991	95.02	184.43
	18	152	F	CD-McB	Saline	Day 6	649.17	136.075	349.636	117.257	247.675	112.212	140.917
	18	153	F	CD-McB	Saline	Day 6	506.519	124.032	438.953	141.795	301.688	124.448
	18	154	F	CD-McB	Saline	Day 6	672.229	122.714	346.105	106.501	275.922	123.222	173.936
	19	155	F	CD	5FU	Day 6	637.366	122.61	410.419	135.059	270.061	108.959	169.967
	19	156	F	CD	5FU	Day 6	766.782	129.195	452.63	131.575	294.8	126.104	178.681
	19	157	F	CD	5FU	Day 6	620.536	136.931			284.057	121.624	179.332
	20	158	F	CD-McB	5FU	Day 6	807.871	159.079	435.929	134.047	264.919	131.569	169.274
	20	159	F	CD-McB	5FU	Day 6	656.522	134.981	434.245	141.007	302.228	124.488	166.709
	20	160	F	CD-McB	5FU	Day 6	720.833	126.751	404.882	132.742	263.933	132.999	187.106
	21	161	F	CD	Saline	Day 6	560.48	96.6663	345.531	95.3867	246.725	84.9627	163.376
	21	162	F	CD	Saline	Day 6			345.413	113.256	232.879	97.3777	166.174
	21	163	F	CD	Saline	Day 6	625.09	105.949	385.919	107.437	281.723	89.813	183.036
	22	164	F	CD-McB	Saline	Day 6	636.189	125.065	396.657	118.688	284.549	127.964	160.421
	22	165	F	CD-McB	Saline	Day 6	716.904	133.36	486.253	130.543	286.202	109.624	161.137
	22	166	F	CD-McB	Saline	Day 6	619.623	133.27			239.119	99.457	143.68
	23	167	F	CD	5FU	Day 6	572.391	109.228	391.363	132.889	277.511	120.711	215.38
	23	168	F	CD	5FU	Day 6	630.565	121.713	467.973	123.926	278.561	101.708	156.106
	23	169	F	CD	5FU	Day 6	579.802	113.856	426.966	136.622	283.738	129.711	183.927
	24	170	F	CD-McB	5FU	Day 6	673.847	147.403	433.29	126.859	265.197	117.867	167.215
	24	171	F	CD-McB	5FU	Day 6			436.685	133.039	193.862	121.462	188.266
	24	172	F	CD-McB	5FU	Day 6	744.244	144.736	450.194	137.045	262.545	121.251	157.267
