# Supplementary material for: Microbial Activation of the GLP-2R Mitigates Gastrointestinal Inflammation
Source: Research Square preprint supplement (doi:10.21203/rs.3.rs-6973437/v1), 2025-07-09
Supplement: Supplementary file 2 [file 2cdfcd64698d26631bca74cd.xlsx]

## Sheet: Sheet2
Mouse ID	Cage Number	Treatment	Hormone Inhibitor Time	Time point	Gavage Time	Blood Collection Time	GLP-2 [pmol/l]
1	1	None	00:00:00	T0	NA	00:30:00	15
2	1	None	00:02:00	T0	NA	00:32:00	11
4	2	None	00:04:00	T0	NA	00:34:00	14
5	2	None	00:06:00	T0	NA	00:36:00	12
7	3	None	00:08:00	T0	NA	00:38:00	15
8	3	None	00:10:00	T0	NA	00:40:00	12
13	5	McB	00:12:00	T5	00:43:00	00:48:00	11
14	5	McB	00:14:00	T5	00:45:00	00:50:00	14
15	5	McB	00:16:00	T5	00:47:00	00:52:00	14
16	6	BSA	00:18:00	T5	00:49:00	00:54:00	13
17	6	BSA	00:20:00	T5	00:51:00	00:56:00	14
18	6	BSA	00:22:00	T5	00:53:00	00:58:00	13
19	7	McB	00:24:00	T5	00:55:00	01:00:00	16
20	7	McB	00:26:00	T5	00:57:00	01:02:00	17
21	7	McB	00:28:00	T5	00:59:00	01:04:00	20
22	8	BSA	00:30:00	T5	01:01:00	01:06:00	11
23	8	BSA	00:32:00	T5	01:03:00	01:08:00	11
24	8	BSA	00:34:00	T5	01:05:00	01:10:00	14
3	1	Glucose	00:36:00	T5	01:07:00	01:12:00	16
6	2	Glucose	00:38:00	T5	01:09:00	01:14:00	21
25	9	McB	00:40:00	T10	01:11:00	01:21:00	20
26	9	McB	00:42:00	T10	01:13:00	01:23:00	14
27	9	McB	00:44:00	T10	01:15:00	01:25:00	14
28	10	BSA	00:46:00	T10	01:17:00	01:27:00	1
29	10	BSA	00:48:00	T10	01:19:00	01:29:00	16
30	10	BSA	00:50:00	T10	01:21:00	01:31:00	17
31	11	McB	00:52:00	T10	01:23:00	01:33:00	13
32	11	McB	00:54:00	T10	01:25:00	01:35:00	13
33	11	McB	00:56:00	T10	01:27:00	01:37:00	17
34	12	BSA	00:58:00	T10	01:29:00	01:39:00	18
35	12	BSA	01:00:00	T10	01:31:00	01:41:00	14
36	12	BSA	01:02:00	T10	01:33:00	01:43:00	14
9	3	Glucose	01:04:00	T10	01:35:00	01:45:00	20
12	4	Glucose	01:06:00	T10	01:37:00	01:47:00	23
37	13	McB	01:08:00	T20	01:39:00	01:59:00	14
38	13	McB	01:10:00	T20	01:41:00	02:01:00	18
39	13	McB	01:12:00	T20	01:43:00	02:03:00	15
40	14	BSA	01:14:00	T20	01:45:00	02:05:00	23
41	14	BSA	01:16:00	T20	01:47:00	02:07:00	11
42	14	BSA	01:18:00	T20	01:49:00	02:09:00	29
43	15	McB	01:20:00	T20	01:51:00	02:11:00	14
44	15	McB	01:22:00	T20	01:53:00	02:13:00	19
45	15	McB	01:24:00	T20	01:55:00	02:15:00	16
46	16	BSA	01:26:00	T20	01:57:00	02:17:00	17
47	16	BSA	01:28:00	T20	01:59:00	02:19:00	13
48	16	BSA	01:30:00	T20	02:01:00	02:21:00	25
10	4	Glucose	01:32:00	T20	02:03:00	02:23:00	13
11	4	Glucose	01:34:00	T20	02:05:00	02:25:00	16
