# Supplementary material for: Microbial Activation of the GLP-2R Mitigates Gastrointestinal Inflammation
Source: Research Square preprint supplement (doi:10.21203/rs.3.rs-6973437/v1), 2025-07-09
Supplement: Supplementary file 3 [file 46a0f1617ca5e481688ac312.xlsx]

## Sheet: Readme
THIS SHEET CONTAIN METADATA FOR FIGURE 3 REGARDING WT MICE USED IN COLITIS EXPERIMENT
Histological Scoring system
	Feature	Grade	Description
	Inflammation	0	None
		1	Slight
		2	Moderate
		3	Severe
	Extent	0	None
		1	Partial mucosa
		2	Full mucosa
		3	Muosa + submucosa
	Crypt damage	0	None
		1	1/3
		2	2/3
		3	Only surface epithelium remaining
		4	Entire epithelium lost
	Area involved	1	1-25%
		2	26-50%
		3	51-75%
		4	76-100%
Disease activiy index
Mouse # 17 died between D4 and D5. Body weight recorded the morning of D5, body too rigid for dissection.

## Sheet: Body parameters
Comments	Cage_ID	Mouse_ID	Sex	Arrival	Diet	Drink	D-7	D-2	D0	D1	D2	D3	D4	D5
	1	1	M	8 wks	CD	Water	24.2	24.6	23.8	24.8	24.8	24.6	25.1	25.1
	1	2	M	8 wks	CD	Water	23.6	24.2	24.6	24.7	24.8	24.5	25	24.7
	1	3	M	8 wks	CD	Water	23.2	23.3	23.2	23.7	24.4	23.7	24.2	24.1
	2	4	M	8 wks	CD	DSS 2.5%	24.5	24.8	24.8	25.3	25.4	24.4	25.2	21.4
	2	5	M	8 wks	CD	DSS 2.5%	22.6	22.8	22.2	23.2	22.6	22.8	22.9	22.1
	2	6	M	8 wks	CD	DSS 2.5%	23.8	25.3	26.1	25.2	25.6	25.7	25.7	25.8
	3	7	M	8 wks	CD	Water	24.1	25.1	24.5	25.2	25.7	25.6	24.7	25.7
	3	8	M	8 wks	CD	Water	24.9	25.8	25.5	25.7	25.9	26.2	26.7	26.5
	3	9	M	8 wks	CD	Water	23.6	23.9	24	24.2	24.8	24.9	25	24
	4	10	M	8 wks	CD	Water	22.7	22.6	23.2	23.5	22.7	22.5	23	22.5
	4	11	M	8 wks	CD	Water	25.1	24.9	25.2	26.5	25.6	26.6	26.7	26.3
	4	12	M	8 wks	CD	Water	24.2	24.2	24.2	24.7	24.5	25.1	25.2	24.8
	5	13	M	8 wks	CD-McB	DSS 2.5%	23.2	24.7	24.6	24.9	24.8	25.3	25.4	25.2
	5	14	M	8 wks	CD-McB	DSS 2.5%	24.7	25.5	24.8	25.4	25.1	25.8	25.8	25.3
	5	15	M	8 wks	CD-McB	DSS 2.5%	24.1	25	24.6	25.1	24.8	25.1	25.7	25.4
	6	16	M	8 wks	CD	DSS 2.5%	25.4	25.9	26.3	26.1	25.5	25.4	26.1	24.7
	6	17	M	8 wks	CD	DSS 2.5%	24.2	24.1	25	23.7	22.5	20.8	19	18.4
	6	18	M	8 wks	CD	DSS 2.5%	23.7	23.7	24	23.6	23.8	23.9	23.5	23.4
	7	19	M	8 wks	CD	DSS 2.5%	24.2	23.8	24.1	24.6	24.3	24.4	24.1	22.3
	7	20	M	8 wks	CD	DSS 2.5%	24.5	24.7	25.1	25.3	24.8	26.1	26.6	25.8
	7	21	M	8 wks	CD	DSS 2.5%	22.8	23	23.6	23.3	22.7	23.5	23.6	22.5
	8	22	M	8 wks	CD-McB	DSS 2.5%	23.8	25.8	25.1	26.5	26.3	26.1	26.1	25.6
	8	23	M	8 wks	CD-McB	DSS 2.5%	24.1	25.9	25.4	26.2	25.9	26	26.3	25.7
	8	24	M	8 wks	CD-McB	DSS 2.5%	22.3	23.2	22.7	23.2	22.9	23.3	24	23.6
	9	25	M	8 wks	CD-McB	DSS 2.5%	23.9	24	24.1	24.3	24.2	24	24.4	24.4
	9	26	M	8 wks	CD-McB	DSS 2.5%	24.5	25.4	25.6	26.2	26	25.7	26.3	26.2
	9	27	M	8 wks	CD-McB	DSS 2.5%	25	26	26.3	26.6	26.9	26.1	26.3	26.1
	10	28	M	8 wks	CD-McB	Water	22.3	23.7	23.5	23.9	23.5	23.6	23.9	23.6
	10	29	M	8 wks	CD-McB	Water	23.5	25.2	25	25.4	25.2	25.1	25.5	25.4
	10	30	M	8 wks	CD-McB	Water	21.5	22.5	22.2	22.6	22.3	22.7	22.6	22.4
	11	31	M	8 wks	CD-McB	Water	22.7	24.6	24.5	24.3	24.8	25	25.4	25.2
	11	32	M	8 wks	CD-McB	Water	24.7	25.5	26	26.2	26.2	26.4	26.5	26.5
	11	33	M	8 wks	CD-McB	Water	24.3	25.7	26.1	27	26.8	27.2	27.3	27.4
	12	34	M	8 wks	CD-McB	Water	24.6	26.3	25.9	26.4	26.6	26.9	26.9	27
	12	35	M	8 wks	CD-McB	Water	24.7	26	26.1	26.1	26.7	26.4	26.7	26.2
	12	36	M	8 wks	CD-McB	Water	25	26.3	26.2	27	26.8	26.5	27	27

## Sheet: Weight gain
Comments	Cage_ID	Mouse_ID	Sex	Arrival	Diet	Drink	D0	D1	D2	D3	D4	D5
	1	1	M	8 wks	CD	Water	0	1	1	0.8	1.3	1.3
	1	2	M	8 wks	CD	Water	0	0.1	0.2	-0.1	0.4	0.1
	1	3	M	8 wks	CD	Water	0	0.5	1.2	0.5	1	0.9
	2	4	M	8 wks	CD	DSS 2.5%	0	0.5	0.6	-0.4	0.4	-3.4
	2	5	M	8 wks	CD	DSS 2.5%	0	1	0.4	0.6	0.7	-0.1
	2	6	M	8 wks	CD	DSS 2.5%	0	-0.9	-0.5	-0.4	-0.4	-0.3
	3	7	M	8 wks	CD	Water	0	0.7	1.2	1.1	0.2	1.2
	3	8	M	8 wks	CD	Water	0	0.2	0.4	0.7	1.2	1
	3	9	M	8 wks	CD	Water	0	0.2	0.8	0.9	1	0
	4	10	M	8 wks	CD	Water	0	0.3	-0.5	-0.7	-0.2	-0.7
	4	11	M	8 wks	CD	Water	0	1.3	0.4	1.4	1.5	1.1
	4	12	M	8 wks	CD	Water	0	0.5	0.3	0.9	1	0.6
	5	13	M	8 wks	CD-McB	DSS 2.5%	0	0.3	0.2	0.7	0.8	0.6
	5	14	M	8 wks	CD-McB	DSS 2.5%	0	0.6	0.3	1	1	0.5
	5	15	M	8 wks	CD-McB	DSS 2.5%	0	0.5	0.2	0.5	1.1	0.8
	6	16	M	8 wks	CD	DSS 2.5%	0	-0.2	-0.8	-0.9	-0.2	-1.6
	6	17	M	8 wks	CD	DSS 2.5%	0	-1.3	-2.5	-4.2	-6	-6.6
	6	18	M	8 wks	CD	DSS 2.5%	0	-0.4	-0.2	-0.1	-0.5	-0.6
	7	19	M	8 wks	CD	DSS 2.5%	0	0.5	0.2	0.3	0	-1.8
	7	20	M	8 wks	CD	DSS 2.5%	0	0.2	-0.3	1	1.5	0.7
	7	21	M	8 wks	CD	DSS 2.5%	0	-0.3	-0.9	-0.1	0	-1.1
	8	22	M	8 wks	CD-McB	DSS 2.5%	0	1.4	1.2	1	1	0.5
	8	23	M	8 wks	CD-McB	DSS 2.5%	0	0.8	0.5	0.6	0.9	0.3
	8	24	M	8 wks	CD-McB	DSS 2.5%	0	0.5	0.2	0.6	1.3	0.9
	9	25	M	8 wks	CD-McB	DSS 2.5%	0	0.2	0.1	-0.1	0.3	0.3
	9	26	M	8 wks	CD-McB	DSS 2.5%	0	0.6	0.4	0.1	0.7	0.6
	9	27	M	8 wks	CD-McB	DSS 2.5%	0	0.3	0.6	-0.2	0	-0.2
	10	28	M	8 wks	CD-McB	Water	0	0.4	0	0.1	0.4	0.1
	10	29	M	8 wks	CD-McB	Water	0	0.4	0.2	0.1	0.5	0.4
	10	30	M	8 wks	CD-McB	Water	0	0.4	0.1	0.5	0.4	0.2
	11	31	M	8 wks	CD-McB	Water	0	-0.2	0.3	0.5	0.9	0.7
	11	32	M	8 wks	CD-McB	Water	0	0.2	0.2	0.4	0.5	0.5
	11	33	M	8 wks	CD-McB	Water	0	0.9	0.7	1.1	1.2	1.3
	12	34	M	8 wks	CD-McB	Water	0	0.5	0.7	1	1	1.1
	12	35	M	8 wks	CD-McB	Water	0	0	0.6	0.3	0.6	0.1
	12	36	M	8 wks	CD-McB	Water	0	0.8	0.6	0.3	0.8	0.8

## Sheet: WeightPct
Comments	Cage_ID	Mouse_ID	Sex	Arrival	Diet	Drink	D0	D1	D2	D3	D4	D5
	1	1	M	8 wks	CD	Water	0	4.20168	4.20168	3.36134	5.46218	5.46218
	1	2	M	8 wks	CD	Water	0	0.406504	0.813008	-0.406504	1.62602	0.406504
	1	3	M	8 wks	CD	Water	0	2.15517	5.17241	2.15517	4.31034	3.87931
	2	4	M	8 wks	CD	DSS 2.5%	0	2.01613	2.41935	-1.6129	1.6129	-13.7097
	2	5	M	8 wks	CD	DSS 2.5%	0	4.5045	1.8018	2.7027	3.15315	-0.45045
	2	6	M	8 wks	CD	DSS 2.5%	0	-3.44828	-1.91571	-1.53257	-1.53257	-1.14943
	3	7	M	8 wks	CD	Water	0	2.85714	4.89796	4.4898	0.816327	4.89796
	3	8	M	8 wks	CD	Water	0	0.784314	1.56863	2.7451	4.70588	3.92157
	3	9	M	8 wks	CD	Water	0	0.833333	3.33333	3.75	4.16667	0
	4	10	M	8 wks	CD	Water	0	1.2931	-2.15517	-3.01724	-0.862069	-3.01724
	4	11	M	8 wks	CD	Water	0	5.15873	1.5873	5.55556	5.95238	4.36508
	4	12	M	8 wks	CD	Water	0	2.06612	1.23967	3.71901	4.13223	2.47934
	5	13	M	8 wks	CD-McB	DSS 2.5%	0	1.21951	0.813008	2.84553	3.25203	2.43902
	5	14	M	8 wks	CD-McB	DSS 2.5%	0	2.41935	1.20968	4.03226	4.03226	2.01613
	5	15	M	8 wks	CD-McB	DSS 2.5%	0	2.03252	0.813008	2.03252	4.47154	3.25203
	6	16	M	8 wks	CD	DSS 2.5%	0	-0.760456	-3.04183	-3.42205	-0.760456	-6.08365
	6	17	M	8 wks	CD	DSS 2.5%	0	-5.2	-10	-16.8	-24	-26.4
	6	18	M	8 wks	CD	DSS 2.5%	0	-1.66667	-0.833333	-0.416667	-2.08333	-2.5
	7	19	M	8 wks	CD	DSS 2.5%	0	2.07469	0.829876	1.24481	0	-7.46888
	7	20	M	8 wks	CD	DSS 2.5%	0	0.796813	-1.19522	3.98406	5.9761	2.78884
	7	21	M	8 wks	CD	DSS 2.5%	0	-1.27119	-3.81356	-0.423729	0	-4.66102
	8	22	M	8 wks	CD-McB	DSS 2.5%	0	5.57769	4.78088	3.98406	3.98406	1.99203
	8	23	M	8 wks	CD-McB	DSS 2.5%	0	3.14961	1.9685	2.3622	3.54331	1.1811
	8	24	M	8 wks	CD-McB	DSS 2.5%	0	2.20264	0.881057	2.64317	5.72687	3.96476
	9	25	M	8 wks	CD-McB	DSS 2.5%	0	0.829876	0.414938	-0.414938	1.24481	1.24481
	9	26	M	8 wks	CD-McB	DSS 2.5%	0	2.34375	1.5625	0.390625	2.73437	2.34375
	9	27	M	8 wks	CD-McB	DSS 2.5%	0	1.14068	2.28137	-0.760456	0	-0.760456
	10	28	M	8 wks	CD-McB	Water	0	1.70213	0	0.425532	1.70213	0.425532
	10	29	M	8 wks	CD-McB	Water	0	1.6	0.8	0.4	2	1.6
	10	30	M	8 wks	CD-McB	Water	0	1.8018	0.45045	2.25225	1.8018	0.900901
	11	31	M	8 wks	CD-McB	Water	0	-0.816327	1.22449	2.04082	3.67347	2.85714
	11	32	M	8 wks	CD-McB	Water	0	0.769231	0.769231	1.53846	1.92308	1.92308
	11	33	M	8 wks	CD-McB	Water	0	3.44828	2.68199	4.21456	4.5977	4.98084
	12	34	M	8 wks	CD-McB	Water	0	1.9305	2.7027	3.861	3.861	4.2471
	12	35	M	8 wks	CD-McB	Water	0	0	2.29885	1.14943	2.29885	0.383142
	12	36	M	8 wks	CD-McB	Water	0	3.05344	2.29008	1.14504	3.05344	3.05344

## Sheet: DAS
Comments	Cage_ID	Mouse_ID	Sex	Arrival	Diet	Drink	D0	D1	D2	D3	D4	D5
	1	1	M	8 wks	CD	Water	0	0	0	0	0	0
	1	2	M	8 wks	CD	Water	0	0	0	0	0	0
	1	3	M	8 wks	CD	Water	0	0	0	0	0	0
	2	4	M	8 wks	CD	DSS 2.5%	0	1	2	4	4	7
	2	5	M	8 wks	CD	DSS 2.5%	0	1	1	3	4	8
	2	6	M	8 wks	CD	DSS 2.5%	0	3	3	4	5	5
	3	7	M	8 wks	CD	Water	0	0	0	0	0	0
	3	8	M	8 wks	CD	Water	0	0	0	0	0	0
	3	9	M	8 wks	CD	Water	0	0	0	0	0	0
	4	10	M	8 wks	CD	Water	0	0	1	1	0	1
	4	11	M	8 wks	CD	Water	0	0	0	0	0	0
	4	12	M	8 wks	CD	Water	0	0	0	0	0	0
	5	13	M	8 wks	CD-McB	DSS 2.5%	0	1	1	2	3	3
	5	14	M	8 wks	CD-McB	DSS 2.5%	0	1	1	1	1	2
	5	15	M	8 wks	CD-McB	DSS 2.5%	0	1	1	1	3	3
	6	16	M	8 wks	CD	DSS 2.5%	0	2	3	5	4	7
	6	17	M	8 wks	CD	DSS 2.5%	0	5	6	9	12	12
	6	18	M	8 wks	CD	DSS 2.5%	0	3	3	3	5	6
	7	19	M	8 wks	CD	DSS 2.5%	0	2	2	4	5	10
	7	20	M	8 wks	CD	DSS 2.5%	0	1	3	2	4	5
	7	21	M	8 wks	CD	DSS 2.5%	0	3	3	3	4	7
	8	22	M	8 wks	CD-McB	DSS 2.5%	0	1	1	1	3	3
	8	23	M	8 wks	CD-McB	DSS 2.5%	0	1	1	1	2	3
	8	24	M	8 wks	CD-McB	DSS 2.5%	0	1	1	1	3	3
	9	25	M	8 wks	CD-McB	DSS 2.5%	0	1	1	1	3	2
	9	26	M	8 wks	CD-McB	DSS 2.5%	0	1	1	1	2	3
	9	27	M	8 wks	CD-McB	DSS 2.5%	0	1	1	2	2	3
	10	28	M	8 wks	CD-McB	Water	0	0	0	0	0	0
	10	29	M	8 wks	CD-McB	Water	0	0	0	0	0	0
	10	30	M	8 wks	CD-McB	Water	0	0	0	0	0	0
	11	31	M	8 wks	CD-McB	Water	0	0	0	0	0	0
	11	32	M	8 wks	CD-McB	Water	0	0	0	0	0	0
	11	33	M	8 wks	CD-McB	Water	0	0	0	0	0	0
	12	34	M	8 wks	CD-McB	Water	0	0	0	0	0	0
	12	35	M	8 wks	CD-McB	Water	0	0	0	0	0	0
	12	36	M	8 wks	CD-McB	Water	0	0	0	0	0	0

## Sheet: DAS Calculation
							BW Score							Presence of blood in feces							Fecal consistency							Total
Comments	Cage_ID	Mouse_ID	Sex	Arrival	Diet	Drink	D0	D1	D2	D3	D4	D5		D0	D1	D2	D3	D4	D5		D0	D1	D2	D3	D4	D5		D0	D1	D2	D3	D4	D5
	1	1	M	8 wks	CD	Water	0	0	0	0	0	0		0	0	0	0	0	0		0	0	0	0	0	0		0	0	0	0	0	0
	1	2	M	8 wks	CD	Water	0	0	0	0	0	0		0	0	0	0	0	0		0	0	0	0	0	0		0	0	0	0	0	0
	1	3	M	8 wks	CD	Water	0	0	0	0	0	0		0	0	0	0	0	0		0	0	0	0	0	0		0	0	0	0	0	0
	2	4	M	8 wks	CD	DSS 2.5%	0	0	0	1	0	3		0	0	0	1	2	2		0	1	2	2	2	2		0	1	2	4	4	7
	2	5	M	8 wks	CD	DSS 2.5%	0	0	0	0	0	0		0	0	0	1	2	4		0	1	1	2	2	4		0	1	1	3	4	8
	2	6	M	8 wks	CD	DSS 2.5%	0	1	1	1	1	1		0	0	0	1	2	2		0	2	2	2	2	2		0	3	3	4	5	5
	3	7	M	8 wks	CD	Water	0	0	0	0	0	0		0	0	0	0	0	0		0	0	0	0	0	0		0	0	0	0	0	0
	3	8	M	8 wks	CD	Water	0	0	0	0	0	0		0	0	0	0	0	0		0	0	0	0	0	0		0	0	0	0	0	0
	3	9	M	8 wks	CD	Water	0	0	0	0	0	0		0	0	0	0	0	0		0	0	0	0	0	0		0	0	0	0	0	0
	4	10	M	8 wks	CD	Water	0	0	1	1	0	1		0	0	0	0	0	0		0	0	0	0	0	0		0	0	1	1	0	1
	4	11	M	8 wks	CD	Water	0	0	0	0	0	0		0	0	0	0	0	0		0	0	0	0	0	0		0	0	0	0	0	0
	4	12	M	8 wks	CD	Water	0	0	0	0	0	0		0	0	0	0	0	0		0	0	0	0	0	0		0	0	0	0	0	0
	5	13	M	8 wks	CD-McB	DSS 2.5%	0	0	0	0	0	0		0	0	0	0	2	2		0	1	1	2	1	1		0	1	1	2	3	3
	5	14	M	8 wks	CD-McB	DSS 2.5%	0	0	0	0	0	0		0	0	0	0	0	1		0	1	1	1	1	1		0	1	1	1	1	2
	5	15	M	8 wks	CD-McB	DSS 2.5%	0	0	0	0	0	0		0	0	0	0	2	1		0	1	1	1	1	2		0	1	1	1	3	3
	6	16	M	8 wks	CD	DSS 2.5%	0	0	1	1	0	2		0	0	0	2	2	3		0	2	2	2	2	2		0	2	3	5	4	7
	6	17	M	8 wks	CD	DSS 2.5%	0	2	2	4	4	4		0	1	2	3	4	4		0	2	2	2	4	4		0	5	6	9	12	12
	6	18	M	8 wks	CD	DSS 2.5%	0	1	0	0	1	1		0	0	1	1	2	3		0	2	2	2	2	2		0	3	3	3	5	6
	7	19	M	8 wks	CD	DSS 2.5%	0	0	0	0	0	2		0	0	0	2	3	4		0	2	2	2	2	4		0	2	2	4	5	10
	7	20	M	8 wks	CD	DSS 2.5%	0	0	1	0	0	0		0	0	0	0	2	3		0	1	2	2	2	2		0	1	3	2	4	5
	7	21	M	8 wks	CD	DSS 2.5%	0	1	1	0	0	2		0	0	0	1	2	3		0	2	2	2	2	2		0	3	3	3	4	7
	8	22	M	8 wks	CD-McB	DSS 2.5%	0	0	0	0	0	0		0	0	0	0	2	2		0	1	1	1	1	1		0	1	1	1	3	3
	8	23	M	8 wks	CD-McB	DSS 2.5%	0	0	0	0	0	0		0	0	0	0	1	1		0	1	1	1	1	2		0	1	1	1	2	3
	8	24	M	8 wks	CD-McB	DSS 2.5%	0	0	0	0	0	0		0	0	0	0	2	2		0	1	1	1	1	1		0	1	1	1	3	3
	9	25	M	8 wks	CD-McB	DSS 2.5%	0	0	0	0	0	0		0	0	0	0	2	1		0	1	1	1	1	1		0	1	1	1	3	2
	9	26	M	8 wks	CD-McB	DSS 2.5%	0	0	0	0	0	0		0	0	0	0	1	2		0	1	1	1	1	1		0	1	1	1	2	3
	9	27	M	8 wks	CD-McB	DSS 2.5%	0	0	0	0	0	0		0	0	0	0	1	2		0	1	1	2	1	1		0	1	1	2	2	3
	10	28	M	8 wks	CD-McB	Water	0	0	0	0	0	0		0	0	0	0	0	0		0	0	0	0	0	0		0	0	0	0	0	0
	10	29	M	8 wks	CD-McB	Water	0	0	0	0	0	0		0	0	0	0	0	0		0	0	0	0	0	0		0	0	0	0	0	0
	10	30	M	8 wks	CD-McB	Water	0	0	0	0	0	0		0	0	0	0	0	0		0	0	0	0	0	0		0	0	0	0	0	0
	11	31	M	8 wks	CD-McB	Water	0	0	0	0	0	0		0	0	0	0	0	0		0	0	0	0	0	0		0	0	0	0	0	0
	11	32	M	8 wks	CD-McB	Water	0	0	0	0	0	0		0	0	0	0	0	0		0	0	0	0	0	0		0	0	0	0	0	0
	11	33	M	8 wks	CD-McB	Water	0	0	0	0	0	0		0	0	0	0	0	0		0	0	0	0	0	0		0	0	0	0	0	0
	12	34	M	8 wks	CD-McB	Water	0	0	0	0	0	0		0	0	0	0	0	0		0	0	0	0	0	0		0	0	0	0	0	0
	12	35	M	8 wks	CD-McB	Water	0	0	0	0	0	0		0	0	0	0	0	0		0	0	0	0	0	0		0	0	0	0	0	0
	12	36	M	8 wks	CD-McB	Water	0	0	0	0	0	0		0	0	0	0	0	0		0	0	0	0	0	0		0	0	0	0	0	0

## Sheet: Necropsy
Comments	Cage_ID	Mouse_ID	Sex	Arrival	Diet	Drink	Spleen	Cecum	Colon	Colon length	Colon length w/o carnoy	SpleenToBW	CecumToBW	ColonToBW	ColonIndex
	1	1	M	8 wks	CD	Water	0.08	0.244	0.127	7.9	7.3	0.318725	0.972112	0.505976	17.3973
	1	2	M	8 wks	CD	Water	0.061	0.165	0.122	7	6.5	0.246964	0.668016	0.493927	18.7692
	1	3	M	8 wks	CD	Water	0.056	0.187	0.129	7.3	6.8	0.232365	0.775934	0.53527	18.9706
	2	4	M	8 wks	CD	DSS 2.5%	0.112	0.397	0.134	5.1	4.6	0.523364	1.85514	0.626168	29.1304
	2	5	M	8 wks	CD	DSS 2.5%	0.084	0.335	0.129	6	5.5	0.38009	1.51584	0.58371	23.4545
	2	6	M	8 wks	CD	DSS 2.5%	0.069	0.225	0.135	6	5.4	0.267442	0.872093	0.523256	25
	3	7	M	8 wks	CD	Water	0.055	0.254	0.159	7.8	7.3	0.214008	0.988327	0.618677	21.7808
	3	8	M	8 wks	CD	Water	0.079	0.189	0.121	7.6	7	0.298113	0.713208	0.456604	17.2857
	3	9	M	8 wks	CD	Water	0.053	0.204	0.133	8.6	8	0.220833	0.85	0.554167	16.625
	4	10	M	8 wks	CD	Water	0.072	0.259	0.111	7.2	6.7	0.32	1.15111	0.493333	16.5672
	4	11	M	8 wks	CD	Water	0.071	0.215	0.126	8.1	7.6	0.269962	0.81749	0.479087	16.5789
	4	12	M	8 wks	CD	Water	0.067	0.173	0.112	7.6	7	0.270161	0.697581	0.451613	16
	5	13	M	8 wks	CD-McB	DSS 2.5%	0.096	0.619	0.151	8	7.5	0.380952	2.45635	0.599206	20.1333
	5	14	M	8 wks	CD-McB	DSS 2.5%	0.088	0.476	0.13	8.1	7.6	0.347826	1.88142	0.513834	17.1053
	5	15	M	8 wks	CD-McB	DSS 2.5%	0.092	0.496	0.154	8.9	8.4	0.362205	1.95276	0.606299	18.3333
	6	16	M	8 wks	CD	DSS 2.5%	0.102	0.325	0.159	5.8	5.3	0.412955	1.31579	0.643725	30
	6	17	M	8 wks	CD	DSS 2.5%
	6	18	M	8 wks	CD	DSS 2.5%	0.073	0.284	0.136	5.8	5.3	0.311966	1.21368	0.581197	25.6604
	7	19	M	8 wks	CD	DSS 2.5%	0.096	0.263	0.154	6	5.5	0.430493	1.17937	0.690583	28
	7	20	M	8 wks	CD	DSS 2.5%	0.063	0.315	0.127	5.9	5.4	0.244186	1.22093	0.492248	23.5185
	7	21	M	8 wks	CD	DSS 2.5%	0.081	0.331	0.137	5.7	5.2	0.36	1.47111	0.608889	26.3462
	8	22	M	8 wks	CD-McB	DSS 2.5%	0.127	0.414	0.143	7.4	7	0.496094	1.61719	0.558594	20.4286
	8	23	M	8 wks	CD-McB	DSS 2.5%	0.085	0.557	0.159	7.6	7	0.330739	2.16732	0.618677	22.7143
	8	24	M	8 wks	CD-McB	DSS 2.5%	0.082	0.407	0.135	7.4	6.9	0.347458	1.72458	0.572034	19.5652
	9	25	M	8 wks	CD-McB	DSS 2.5%	0.079	0.417	0.126	7.2	6.7	0.32377	1.70902	0.516393	18.806
	9	26	M	8 wks	CD-McB	DSS 2.5%	0.088	0.459	0.155	7.3	6.7	0.335878	1.75191	0.591603	23.1343
	9	27	M	8 wks	CD-McB	DSS 2.5%	0.081	0.453	0.124	6.5	6	0.310345	1.73563	0.475096	20.6667
	10	28	M	8 wks	CD-McB	Water	0.07	0.238	0.128	8.9	8.4	0.29661	1.00847	0.542373	15.2381
	10	29	M	8 wks	CD-McB	Water	0.076	0.245	0.131	8.7	8.2	0.299213	0.964567	0.515748	15.9756
	10	30	M	8 wks	CD-McB	Water	0.06	0.282	0.137	9.1	8.5	0.267857	1.25893	0.611607	16.1176
	11	31	M	8 wks	CD-McB	Water	0.07	0.319	0.147	9.1	8.6	0.277778	1.26587	0.583333	17.093
	11	32	M	8 wks	CD-McB	Water	0.088	0.279	0.16	8.5	8	0.332075	1.05283	0.603774	20
	11	33	M	8 wks	CD-McB	Water	0.083	0.27	0.143	9.1	8.6	0.30292	0.985401	0.521898	16.6279
	12	34	M	8 wks	CD-McB	Water	0.091	0.315	0.135	9.3	8.8	0.337037	1.16667	0.5	15.3409
	12	35	M	8 wks	CD-McB	Water	0.083	0.259	0.151	9.2	8.7	0.316794	0.98855	0.576336	17.3563
	12	36	M	8 wks	CD-McB	Water	0.1	0.324	0.145	8.8	8.3	0.37037	1.2	0.537037	17.4699

## Sheet: Histology
Comments	Cage_ID	Mouse_ID	Sex	Arrival	Diet	Drink	Inflammation	Extent	Crypt damage	Area	Score
	1	1	M	8 wks	CD	Water	0	0	0	0	0
	1	2	M	8 wks	CD	Water	0	0	0	0	0
	1	3	M	8 wks	CD	Water	0	1	0	1	1
	2	4	M	8 wks	CD	DSS 2.5%	3	3	4	4	40
	2	5	M	8 wks	CD	DSS 2.5%	2	2	2	4	24
	2	6	M	8 wks	CD	DSS 2.5%	3	3	3	4	36
	3	7	M	8 wks	CD	Water	0	0	0	0	0
	3	8	M	8 wks	CD	Water	0	0	0	0	0
	3	9	M	8 wks	CD	Water	0	0	0	0	0
	4	10	M	8 wks	CD	Water	0	0	0	0	0
	4	11	M	8 wks	CD	Water	0	0	0	0	0
	4	12	M	8 wks	CD	Water	0	0	0	0	0
	5	13	M	8 wks	CD-McB	DSS 2.5%	2	2	2	3	18
	5	14	M	8 wks	CD-McB	DSS 2.5%	3	2	2	3	21
	5	15	M	8 wks	CD-McB	DSS 2.5%	1	2	2	2	10
	6	16	M	8 wks	CD	DSS 2.5%	3	3	4	4	40
	6	17	M	8 wks	CD	DSS 2.5%
	6	18	M	8 wks	CD	DSS 2.5%	3	2	2	3	21
	7	19	M	8 wks	CD	DSS 2.5%	3	3	3	4	36
	7	20	M	8 wks	CD	DSS 2.5%	2	3	3	4	32
	7	21	M	8 wks	CD	DSS 2.5%	3	3	3	4	36
	8	22	M	8 wks	CD-McB	DSS 2.5%	2	1	2	3	15
	8	23	M	8 wks	CD-McB	DSS 2.5%	1	2	1	3	12
	8	24	M	8 wks	CD-McB	DSS 2.5%	2	1	2	3	15
	9	25	M	8 wks	CD-McB	DSS 2.5%	2	1	2	2	10
	9	26	M	8 wks	CD-McB	DSS 2.5%	1	1	1	2	6
	9	27	M	8 wks	CD-McB	DSS 2.5%	1	1	1	2	6
	10	28	M	8 wks	CD-McB	Water	1	0	0	1	1
	10	29	M	8 wks	CD-McB	Water	0	0	0	0	0
	10	30	M	8 wks	CD-McB	Water	0	0	0	0	0
	11	31	M	8 wks	CD-McB	Water	0	0	0	0	0
	11	32	M	8 wks	CD-McB	Water	0	0	0	0	0
	11	33	M	8 wks	CD-McB	Water	0	0	0	0	0
	12	34	M	8 wks	CD-McB	Water	0	0	0	0	0
	12	35	M	8 wks	CD-McB	Water	0	0	0	0	0
	12	36	M	8 wks	CD-McB	Water	0	0	0	0	0
