# Supplementary material for: Microbial Activation of the GLP-2R Mitigates Gastrointestinal Inflammation
Source: Research Square preprint supplement (doi:10.21203/rs.3.rs-6973437/v1), 2025-07-09
Supplement: Supplementary file 4 [file 5bd62e619d583fc6b4036945.xlsx]

## Sheet: README
EACH SHEET CONTAINS RELATIVE QUANTIFICATIONS OF DESIGNATED LAMINA PROPRIA T-CELLS, AS INDICATED.
SD = SIMPLE DIET
SDmcb = SIMPLE DIET WITH MCB AS PROTEIN SOURCE
CD = COMPLEX DIET
CDmcb = COMPLEX DIET WITH MCB AS PROTEIN SOURCE

## Sheet: SMALL INTESTINE
	nTregs			pTregs			IL-17+ pTregs			Th17			IL-17+ Th17			IL-10+ Th17			IFNy+ Th17			Th1
	SD	SDMCB		SD	SDMCB		SD	SDMCB		SD	SDMCB		SD	SDMCB		SD	SDMCB		SD	SDMCB		SD	SDMCB
	18.6	19.9		3.33	14.7		1.14	12.3		13.7	26.5		46.1	48.8		0.83	1.44		16.6	6.51		17.1	18.7
	14.4	18.3		2.45	12		6.77	11.7		19.7	24.5		52.1	60		0.57	1.69		12.8	5.8		18.9	17.6
	20.6	21.7		2.33	8.21		2.64	10.8		14.6	26.4		51	47.1		0.87	1.77		15.3	5.42		25.9	8.11
		20.6			11			9.84			20			61.5			1.89			11			13.3
		14.7			8.67			11.1			27.5			62.4			1.73			5.88			20.8
		18.9			8.57			11.1			26.6			63.9			1.68			6.17			13.6
	CD	CDMCB		CD	CDMCB		CD	CDMCB		CD	CDMCB		CD	CDMCB		CD	CDMCB		CD	CDMCB		CD	CDMCB
	10.2	16.7		3.17	10.4		2.86	9.19		12.3	25.2		33.3	61.2		1.13	1.28		9.32	4.45		16.6	14.8
	12.4	9.8		3	11.2		2.92	4.56		11	34.1		51.7	41.6		1.01	1.79		14.8	3.57		16.9	15.7
	7.8	12		3.07	7.62		1.22	7.52		15.9	20.1		39.4	53.7		1.27	1.8		16.2	5.42		13.3	15.3
		13.6			12.6			10.2			19			50.4			2.7			7.35			16.7
		12.9			10.4			7.98			18.1			52.7			2.28			6.93			9

## Sheet: LARGE INTESTINE
	nTregs			pTregs			IL-17+ pTregs			Th17			IL-17+ Th17			IL-10+ Th17			IFNy+ Th17			Th1
	SD	SDMCB		SD	SDMCB		SD	SDMCB		SD	SDMCB		SD	SDMCB		SD	SDMCB		SD	SDMCB		SD	SDMCB
	15.7	16.9		8.87	27.3		1.24	5.58		4.83	12.1		45.2	40.3		0.25	1.63		16.5	9.72		9.31	9.8
	20.2	18.3		12.8	31.9		2.35	5.96		13.7	15		69.6	52.6		0.7	1.39		11.5	9.59		7.45	16.2
	20.2	20.7		11	23.3		2.37	5.97		11.5	10.6		59.8	56.5		0.88	2.24		18.7	9.69		19.2	15.6
		16.1			21.9			6.38			13.1			60.5			2.3			12.7			21.3
		18.7			23.3			5.4			14.5			57.5			3.01			7.92			18.6
	CD	CDMCB		CD	CDMCB		CD	CDMCB		CD	CDMCB		CD	CDMCB		CD	CDMCB		CD	CDMCB		CD	CDMCB
	21	16.6		16.1	20.6		4.52	6		11.5	14		49.8	45		1.18	1.6		15.8	12.7		17.5	20.9
	18.7	23.9		19.5	15.4		3.26	5.1		17	14.4		53	51.5		1.08	1.9		12.7	11.4		19.6	16.8
	17.3	15.4		15.4	19.8		1.81	5.54		19.3	16.6		35.2	50.6		0.65	2.16		7.78	7.11		10.4	11.9
		12.5			28.9			11			16.8			46.6			1.67			10.8			21.3
		16.5			29.1			6.99			11.4			50.5			2.07			8.42			15
		15.6			23.9			6.06			13.7			50.8			1.98			11.6			15.8
