# Supplementary material for: Microbial Activation of the GLP-2R Mitigates Gastrointestinal Inflammation
Source: Research Square preprint supplement (doi:10.21203/rs.3.rs-6973437/v1), 2025-07-09
Supplement: Supplementary file 5 [file 6727c2b092243323dedea65c.xlsx]

## Sheet: README
THIS SHEET CONTAINS METADATA FOR SUPPLEMENTARY FIGURE S5 REGARDING EXPERIMENTAL COLITIS IN WT AND KO GLP-1R MICE

## Sheet: Body parameters
Cage_ID	Mouse_ID	Sex	Genotype	Group	D-7	D0	D1	D2	D3	D4	D5
5	339	M	+/+	Reference-Water	34.1	31.2	32.2	32.1	31.8	31.4	32.6
6	359	M	-/-	Reference-Water	35.3	32.9	32.6	33.1	33.9	33.8	34.2
7	371	M	-/-	Reference-Water	30.7	29.3	29.4	29.8	29.5	29.7	30.5
8	363	M	-/-	Reference-DSS	26.8	26	25.8	24.5	24.5	23.6	21.9
8	361	M	+/+	Reference-DSS	26.3	25.6	24.5	22.8	22.3	21.2	19.7
9	351	M	+/+	Reference-DSS	23.5	22.4	22.1	21.3	20.3	19.8	18.8
10	325	M	-/-	Reference-DSS	36.5	35	35.1	34.8	34.5	32.5	30.6
11	331	M	-/-	McB-Water	36.7	36.7	36	36.4	37	36.9	37.9
12	373	M	-/-	McB-Water	28.8	29.2	28.2	27.8	28.8	28.5	28.9
13	341	M	+/+	McB-Water	32	31.3	30.8	30.6	30.4	30.4	30.4
14	357	M	+/+	McB-Water	31.9	30.8	31.3	31.1	30.4	30.5	30.4
19	345	M	-/-	McB-DSS	36.2	36.4	35.9	35.4	35.5	34.8	34.9
15	349	M	+/+	McB-DSS	34.9	32.8	33.5	33.6	33.2	32.1	29.7
16	375	M	-/-	McB-DSS	29.8	30.5	31	30.1	29.2	29	28.4
17	333	M	-/-	McB-DSS	33.4	32.7	32.7	31.1	30.3	30.1	29.5
18	353	M	+/+	McB-DSS	25.7	25.3	25.2	24.7	25.1	25.7	25
19	389	M	-/-	Reference-Water	28.2	27.9	28	28.4	28.7	28.2	28.7
20	419	M	-/-	Reference-Water	24.5	25.8	27	26.9	27.4	27.7	27.8
20	423	M	+/+	Reference-Water	26.6	27.7	28.3	28.6	28.5	28.2	28.3
21	381	M	+/+	Reference-DSS	31.4	31.4	31.4	31	32.9	31.9	31.9
21	385	M	-/-	Reference-DSS	35.6	35	34.2	34.3	34.3	33.9	31.8
22	413	M	-/-	Reference-DSS	26.6	26.7	26.2	25.5	23.6	21.9
23	401	M	-/-	McB-Water	31.5	31.5	30.7	30.5	31.4	31.3	31.7
24	409	M	+/+	McB-Water	28.4	29.6	29.1	28.9	28.6	28.9	28.6
25	379	M	+/+	McB-DSS	31.9	31.9	31.3	31	31.3	30.7	30.7
26	393	M	-/-	McB-DSS	29.5	30.2	30.3	29.9	29.1	27.5	25
26	395	M	-/-	McB-DSS	28.4	29.9	29.7	29	29.8	29.9	29.1
27	431	M	-/-	McB-DSS	30.8	29	29.6	30.4	29.9	29.2	30.2
28	435	M	-/-	Reference-DSS	33.6	32.6	33.3	32.5	31.4	30.6	28.99
29	437	M	-/-	Reference-DSS	34.7	34.2	34.5	33.8	32.1	30	27.6
30	441	M	-/-	McB-Water	27.5	28.5	28.9	29	28.6	29.6	29.7
30	445	M	-/-	McB-Water	28.4	29.1	29.1	28.6	28.3	28.6	28.5
30	447	M	-/-	McB-Water	28.2	29.5	29.5	29.3	29.1	29.1	29.4
31	459	M	+/+	Reference-Water	26.3	26.7	27.6	27	26.4	26.5	26.6
32	467	M	-/-	Reference-Water	31	30.9	31.5	30.6	30	30	30.9
33	475	M	-/-	Reference-DSS	31.8	33.8	34.1	34.5	33.9	31.9	28.6
33	477	M	-/-	Reference-DSS	31.1	31.5	32.1	32.1	31	29.7	27.1
33	479	M	+/+	Reference-DSS	31.5	32.2	31.2	31.3	29.1	28.1	25.1
33	483	M	+/+	Reference-DSS	31.3	32.4	33.3	32.3	31.6	31.8	30.7
33	485	M	-/-	Reference-DSS	32.2	32.5	33	32.3	32	30.5	28.1
34	487	M	-/-	McB-DSS	28.7	30.9	30.7	31.2	30.6	29.8	29.3
34	489	M	+/+	McB-DSS	29.6	31.4	31.4	32.4	31.9	31	30.6
34	491	M	-/-	McB-DSS	28	29.5	29.6	30.1	30	29.5	28.6
34	493	M	+/+	McB-DSS	29	30.1	30.1	30.8	30.2	30.2	29.8
34	495	M	+/+	McB-DSS	29.6	30.4	30.6	30.1	30	29.7	28.6
35	529	M	+/+	Reference-DSS	31.4	32		32.1	31.9	32	31.2
36	533	M	+/+	McB-DSS	33.4	31.4	31.6	31.6	30.4	31.5	30.9
37	527	M	-/-	Reference-Water	35.1	34	34.8	34.2	34.6	34.7	34.8
38	551	M	-/-	Reference-Water	26.1	25.7	25.4	25.3	26.1	26.3	25.8
39	563	M	-/-	McB-Water	25.5	26.6	26	26.6	27.1	27	27.1
39	567	M	-/-	McB-Water	27.9	28.5	28.3	27.9	28.2	28.3	28.3
40	517	M	+/+	Reference-Water	28.2	27.7	28.4	28.4	28	27.7	27.5
40	519	M	+/+	Reference-Water	31.4	32.1	32.8	33.2	33	33.1	32.9
40	521	M	+/+	Reference-Water	22.4	18.3	20.2	21.2	22.2	22.3	23.7
41	561	M	+/+	McB-Water	24.6	25.1	24.9	24.6	24.8	25.6	25.1
42	535	M	+/+	McB-Water	33.6	33.6	34.7	34	33.7	34.1	33.8
42	537	M	+/+	McB-Water	33.1	33.1	33.8	33.8	33.6	34.2	33.8

## Sheet: Weight gain
Cage_ID	Mouse_ID	Sex	Genotype	Group	D0	D1	D2	D3	D4	D5
5	339	M	+/+	Reference-Water	0	1	0.9	0.6	0.2	1.4
6	359	M	-/-	Reference-Water	0	-0.3	0.2	1	0.9	1.3
7	371	M	-/-	Reference-Water	0	0.1	0.5	0.2	0.4	1.2
8	363	M	-/-	Reference-DSS	0	-0.2	-1.5	-1.5	-2.4	-4.1
8	361	M	+/+	Reference-DSS	0	-1.1	-2.8	-3.3	-4.4	-5.9
9	351	M	+/+	Reference-DSS	0	-0.3	-1.1	-2.1	-2.6	-3.6
10	325	M	-/-	Reference-DSS	0	0.1	-0.2	-0.5	-2.5	-4.4
11	331	M	-/-	McB-Water	0	-0.7	-0.3	0.3	0.2	1.2
12	373	M	-/-	McB-Water	0	-1	-1.4	-0.4	-0.7	-0.3
13	341	M	+/+	McB-Water	0	-0.5	-0.7	-0.9	-0.9	-0.9
14	357	M	+/+	McB-Water	0	0.5	0.3	-0.4	-0.3	-0.4
19	345	M	-/-	McB-DSS	0	-0.5	-1	-0.9	-1.6	-1.5
15	349	M	+/+	McB-DSS	0	0.7	0.8	0.4	-0.7	-3.1
16	375	M	-/-	McB-DSS	0	0.5	-0.4	-1.3	-1.5	-2.1
17	333	M	-/-	McB-DSS	0	0	-1.6	-2.4	-2.6	-3.2
18	353	M	+/+	McB-DSS	0	-0.1	-0.6	-0.2	0.4	-0.3
19	389	M	-/-	Reference-Water	0	0.1	0.5	0.8	0.3	0.8
20	419	M	-/-	Reference-Water	0	1.2	1.1	1.6	1.9	2
20	423	M	+/+	Reference-Water	0	0.6	0.9	0.8	0.5	0.6
21	381	M	+/+	Reference-DSS	0	0	-0.4	1.5	0.5	0.5
21	385	M	-/-	Reference-DSS	0	-0.8	-0.7	-0.7	-1.1	-3.2
22	413	M	-/-	Reference-DSS	0	-0.5	-1.2	-3.1	-4.8
23	401	M	-/-	McB-Water	0	-0.8	-1	-0.1	-0.2	0.2
24	409	M	+/+	McB-Water	0	-0.5	-0.7	-1	-0.7	-1
25	379	M	+/+	McB-DSS	0	-0.6	-0.9	-0.6	-1.2	-1.2
26	393	M	-/-	McB-DSS	0	0.1	-0.3	-1.1	-2.7	-5.2
26	395	M	-/-	McB-DSS	0	-0.2	-0.9	-0.1	0	-0.8
27	431	M	-/-	McB-DSS	0	0.6	1.4	0.9	0.2	1.2
28	435	M	-/-	Reference-DSS	0	0.7	-0.1	-1.2	-2	-3.61
29	437	M	-/-	Reference-DSS	0	0.3	-0.4	-2.1	-4.2	-6.6
30	441	M	-/-	McB-Water	0	0.4	0.5	0.1	1.1	1.2
30	445	M	-/-	McB-Water	0	0	-0.5	-0.8	-0.5	-0.6
30	447	M	-/-	McB-Water	0	0	-0.2	-0.4	-0.4	-0.1
31	459	M	+/+	Reference-Water	0	0.9	0.3	-0.3	-0.2	-0.1
32	467	M	-/-	Reference-Water	0	0.6	-0.3	-0.9	-0.9	0
33	475	M	-/-	Reference-DSS	0	0.3	0.7	0.1	-1.9	-5.2
33	477	M	-/-	Reference-DSS	0	0.6	0.6	-0.5	-1.8	-4.4
33	479	M	+/+	Reference-DSS	0	-1	-0.9	-3.1	-4.1	-7.1
33	483	M	+/+	Reference-DSS	0	0.9	-0.1	-0.8	-0.6	-1.7
33	485	M	-/-	Reference-DSS	0	0.5	-0.2	-0.5	-2	-4.4
34	487	M	-/-	McB-DSS	0	-0.2	0.3	-0.3	-1.1	-1.6
34	489	M	+/+	McB-DSS	0	0	1	0.5	-0.4	-0.8
34	491	M	-/-	McB-DSS	0	0.1	0.6	0.5	0	-0.9
34	493	M	+/+	McB-DSS	0	0	0.7	0.1	0.1	-0.3
34	495	M	+/+	McB-DSS	0	0.2	-0.3	-0.4	-0.7	-1.8
35	529	M	+/+	Reference-DSS	0		0.1	-0.1	0	-0.8
36	533	M	+/+	McB-DSS	0	0.2	0.2	-1	0.1	-0.5
37	527	M	-/-	Reference-Water	0	0.8	0.2	0.6	0.7	0.8
38	551	M	-/-	Reference-Water	0	-0.3	-0.4	0.4	0.6	0.1
39	563	M	-/-	McB-Water	0	-0.6	0	0.5	0.4	0.5
39	567	M	-/-	McB-Water	0	-0.2	-0.6	-0.3	-0.2	-0.2
40	517	M	+/+	Reference-Water	0	0.7	0.7	0.3	0	-0.2
40	519	M	+/+	Reference-Water	0	0.7	1.1	0.9	1	0.8
40	521	M	+/+	Reference-Water	0	1.9	2.9	3.9	4	5.4
41	561	M	+/+	McB-Water	0	-0.2	-0.5	-0.3	0.5	0
42	535	M	+/+	McB-Water	0	1.1	0.4	0.1	0.5	0.2
42	537	M	+/+	McB-Water	0	0.7	0.7	0.5	1.1	0.7

## Sheet: WeightPct
Cage_ID	Mouse_ID	Sex	Genotype	Group	D0	D1	D2	D3	D4	D5
5	339	M	+/+	Reference-Water	0	3.20513	2.88462	1.92308	0.641026	4.48718
6	359	M	-/-	Reference-Water	0	-0.911854	0.607903	3.03951	2.73556	3.95137
7	371	M	-/-	Reference-Water	0	0.341297	1.70648	0.682594	1.36519	4.09556
8	363	M	-/-	Reference-DSS	0	-0.769231	-5.76923	-5.76923	-9.23077	-15.7692
8	361	M	+/+	Reference-DSS	0	-4.29688	-10.9375	-12.8906	-17.1875	-23.0469
9	351	M	+/+	Reference-DSS	0	-1.33929	-4.91071	-9.375	-11.6071	-16.0714
10	325	M	-/-	Reference-DSS	0	0.285714	-0.571429	-1.42857	-7.14286	-12.5714
11	331	M	-/-	McB-Water	0	-1.90736	-0.817439	0.817439	0.544959	3.26975
12	373	M	-/-	McB-Water	0	-3.42466	-4.79452	-1.36986	-2.39726	-1.0274
13	341	M	+/+	McB-Water	0	-1.59744	-2.23642	-2.8754	-2.8754	-2.8754
14	357	M	+/+	McB-Water	0	1.62338	0.974026	-1.2987	-0.974026	-1.2987
19	345	M	-/-	McB-DSS	0	-1.37363	-2.74725	-2.47253	-4.3956	-4.12088
15	349	M	+/+	McB-DSS	0	2.13415	2.43902	1.21951	-2.13415	-9.45122
16	375	M	-/-	McB-DSS	0	1.63934	-1.31148	-4.2623	-4.91803	-6.88525
17	333	M	-/-	McB-DSS	0	0	-4.89297	-7.33945	-7.95107	-9.78593
18	353	M	+/+	McB-DSS	0	-0.395257	-2.37154	-0.790514	1.58103	-1.18577
19	389	M	-/-	Reference-Water	0	0.358423	1.79211	2.86738	1.07527	2.86738
20	419	M	-/-	Reference-Water	0	4.65116	4.26357	6.20155	7.36434	7.75194
20	423	M	+/+	Reference-Water	0	2.16606	3.2491	2.88809	1.80505	2.16606
21	381	M	+/+	Reference-DSS	0	0	-1.27389	4.77707	1.59236	1.59236
21	385	M	-/-	Reference-DSS	0	-2.28571	-2	-2	-3.14286	-9.14286
22	413	M	-/-	Reference-DSS	0	-1.87266	-4.49438	-11.6105	-17.9775
23	401	M	-/-	McB-Water	0	-2.53968	-3.1746	-0.31746	-0.634921	0.634921
24	409	M	+/+	McB-Water	0	-1.68919	-2.36486	-3.37838	-2.36486	-3.37838
25	379	M	+/+	McB-DSS	0	-1.88088	-2.82132	-1.88088	-3.76176	-3.76176
26	393	M	-/-	McB-DSS	0	0.331126	-0.993377	-3.64238	-8.9404	-17.2185
26	395	M	-/-	McB-DSS	0	-0.668896	-3.01003	-0.334448	0	-2.67559
27	431	M	-/-	McB-DSS	0	2.06897	4.82759	3.10345	0.689655	4.13793
28	435	M	-/-	Reference-DSS	0	2.14724	-0.306748	-3.68098	-6.13497	-11.0736
29	437	M	-/-	Reference-DSS	0	0.877193	-1.16959	-6.14035	-12.2807	-19.2982
30	441	M	-/-	McB-Water	0	1.40351	1.75439	0.350877	3.85965	4.21053
30	445	M	-/-	McB-Water	0	0	-1.71821	-2.74914	-1.71821	-2.06186
30	447	M	-/-	McB-Water	0	0	-0.677966	-1.35593	-1.35593	-0.338983
31	459	M	+/+	Reference-Water	0	3.37079	1.1236	-1.1236	-0.749064	-0.374532
32	467	M	-/-	Reference-Water	0	1.94175	-0.970874	-2.91262	-2.91262	0
33	475	M	-/-	Reference-DSS	0	0.887574	2.07101	0.295858	-5.6213	-15.3846
33	477	M	-/-	Reference-DSS	0	1.90476	1.90476	-1.5873	-5.71429	-13.9683
33	479	M	+/+	Reference-DSS	0	-3.10559	-2.79503	-9.62733	-12.7329	-22.0497
33	483	M	+/+	Reference-DSS	0	2.77778	-0.308642	-2.46914	-1.85185	-5.24691
33	485	M	-/-	Reference-DSS	0	1.53846	-0.615385	-1.53846	-6.15385	-13.5385
34	487	M	-/-	McB-DSS	0	-0.647249	0.970874	-0.970874	-3.55987	-5.17799
34	489	M	+/+	McB-DSS	0	0	3.18471	1.59236	-1.27389	-2.54777
34	491	M	-/-	McB-DSS	0	0.338983	2.0339	1.69492	0	-3.05085
34	493	M	+/+	McB-DSS	0	0	2.32558	0.332226	0.332226	-0.996678
34	495	M	+/+	McB-DSS	0	0.657895	-0.986842	-1.31579	-2.30263	-5.92105
35	529	M	+/+	Reference-DSS	0		0.3125	-0.3125	0	-2.5
36	533	M	+/+	McB-DSS	0	0.636943	0.636943	-3.18471	0.318471	-1.59236
37	527	M	-/-	Reference-Water	0	2.35294	0.588235	1.76471	2.05882	2.35294
38	551	M	-/-	Reference-Water	0	-1.16732	-1.55642	1.55642	2.33463	0.389105
39	563	M	-/-	McB-Water	0	-2.25564	0	1.8797	1.50376	1.8797
39	567	M	-/-	McB-Water	0	-0.701754	-2.10526	-1.05263	-0.701754	-0.701754
40	517	M	+/+	Reference-Water	0	2.52708	2.52708	1.08303	0	-0.722022
40	519	M	+/+	Reference-Water	0	2.18069	3.42679	2.80374	3.11526	2.49221
40	521	M	+/+	Reference-Water	0	10.3825	15.847	21.3115	21.8579	29.5082
41	561	M	+/+	McB-Water	0	-0.796813	-1.99203	-1.19522	1.99203	0
42	535	M	+/+	McB-Water	0	3.27381	1.19048	0.297619	1.4881	0.595238
42	537	M	+/+	McB-Water	0	2.1148	2.1148	1.51057	3.32326	2.1148

## Sheet: DAS
Cage_ID	Mouse_ID	Sex	Genotype	Group	D0	D1	D2	D3	D4	D5
5	339	M	+/+	Reference-Water	0	0	0	0	0	0
6	359	M	-/-	Reference-Water	0	0	0	0	0	0
7	371	M	-/-	Reference-Water	0	0	0	0	0	0
8	363	M	-/-	Reference-DSS	0	0	4	7	9	12
8	361	M	+/+	Reference-DSS	0	4	8	8	11	12
9	351	M	+/+	Reference-DSS	0	2	5	6	7	12
10	325	M	-/-	Reference-DSS	0	1	3	5	7	10
11	331	M	-/-	McB-Water	0	1	0	0	0	0
12	373	M	-/-	McB-Water	0	1	2	1	1	1
13	341	M	+/+	McB-Water	0	1	1	1	1	1
14	357	M	+/+	McB-Water	0	0	0	1	0	1
19	345	M	-/-	McB-DSS	0	2	2	4	4	5
15	349	M	+/+	McB-DSS	0	1	2	3	5	6
16	375	M	-/-	McB-DSS	0	1	2	5	7	7
17	333	M	-/-	McB-DSS	0	0	3	5	5	6
18	353	M	+/+	McB-DSS	0	0	1	2	3	4
19	389	M	-/-	Reference-Water	0	0	0	0	0	0
20	419	M	-/-	Reference-Water	0	0	1	0	0	0
20	423	M	+/+	Reference-Water	0	0	0	1	1	0
21	381	M	+/+	Reference-DSS	0	4	2	1	2	2
21	385	M	-/-	Reference-DSS	0	3	3	3	4	10
22	413	M	-/-	Reference-DSS	0	3	8	11	12	12
23	401	M	-/-	McB-Water	0	1	1	0	1	0
24	409	M	+/+	McB-Water	0	1	1	1	1	1
25	379	M	+/+	McB-DSS	0	2	2	2	3	3
26	393	M	-/-	McB-DSS	0	2	2	5	6	11
26	395	M	-/-	McB-DSS	0	2	2	4	2	7
27	431	M	-/-	McB-DSS	0	1	1	2	3	2
28	435	M	-/-	Reference-DSS	0	2	2	4	6	9
29	437	M	-/-	Reference-DSS	0	2	4	5	10	12
30	441	M	-/-	McB-Water	0	0	0	1	0	0
30	445	M	-/-	McB-Water	0	0	2	2	1	1
30	447	M	-/-	McB-Water	0	0	0	2	1	0
31	459	M	+/+	Reference-Water	0	0	0	1	0	0
32	467	M	-/-	Reference-Water	0	0	0	1	1	0
33	475	M	-/-	Reference-DSS	0	2	2	3	10	12
33	477	M	-/-	Reference-DSS	0	3	2	4	8	11
33	479	M	+/+	Reference-DSS	0	3	4	7	9	12
33	483	M	+/+	Reference-DSS	0	3	2	4	5	7
33	485	M	-/-	Reference-DSS	0	2	3	4	7	9
34	487	M	-/-	McB-DSS	0	1	2	3	5	6
34	489	M	+/+	McB-DSS	0	1	1	3	3	3
34	491	M	-/-	McB-DSS	0	1	1	2	3	4
34	493	M	+/+	McB-DSS	0	1	1	1	2	2
34	495	M	+/+	McB-DSS	0	1	1	3	5	5
35	529	M	+/+	Reference-DSS	0	2	2	2	2	5
36	533	M	+/+	McB-DSS	0	1	2	3	2	3
37	527	M	-/-	Reference-Water	0	0	0	0	0	0
38	551	M	-/-	Reference-Water	0	1	1	0	0	0
39	563	M	-/-	McB-Water	0	1	0	0	0	0
39	567	M	-/-	McB-Water	0	1	2	1	0	0
40	517	M	+/+	Reference-Water	0	1	0	0	0	0
40	519	M	+/+	Reference-Water	0	0	0	0	0	0
40	521	M	+/+	Reference-Water	0	0	0	0	0	0
41	561	M	+/+	McB-Water	0	0	1	1	0	0
42	535	M	+/+	McB-Water	0	0	1	1	0	0
42	537	M	+/+	McB-Water	0	0	0	1	1	1

## Sheet: Necropsy
Cage_ID	Mouse_ID	Sex	Genotype	Group	Spleen	Cecum	Colon	Colon length	Colon length w/o carnoy	SpleenToBW	CecumToBW	ColonToBW	ColonIndex
5	339	M	+/+	Reference-Water	0.075	0.349	0.14	8.4	7.8	0.230061	1.07055	0.429448	17.9487
6	359	M	-/-	Reference-Water	0.08	0.331	0.163	8.1	7.5	0.233918	0.967836	0.476608	21.7333
7	371	M	-/-	Reference-Water	0.071	0.291	0.127	8.2	7.5	0.232787	0.954098	0.416393	16.9333
8	363	M	-/-	Reference-DSS	0.088	0.241	0.101	5.1	4.6	0.401826	1.10046	0.461187	21.9565
8	361	M	+/+	Reference-DSS	0.135	0.096	0.128	5.2	4.6	0.685279	0.48731	0.649746	27.8261
9	351	M	+/+	Reference-DSS	0.077	0.2	0.108	5.8	5.1	0.409574	1.06383	0.574468	21.1765
10	325	M	-/-	Reference-DSS	0.1	0.17	0.136	6.5	5.9	0.326797	0.555556	0.444444	23.0508
11	331	M	-/-	McB-Water	0.106	0.612	0.165	8.3	7.6	0.279683	1.61478	0.435356	21.7105
12	373	M	-/-	McB-Water	0.08	0.45	0.13	7.2	6.6	0.276817	1.55709	0.449827	19.697
13	341	M	+/+	McB-Water	0.11	0.449	0.15	9	8.2	0.361842	1.47697	0.493421	18.2927
14	357	M	+/+	McB-Water	0.084	0.375	0.132	8.1	7.4	0.276316	1.23355	0.434211	17.8378
19	345	M	-/-	McB-DSS	0.105	0.509	0.165	7.4	6.7	0.30086	1.45845	0.472779	24.6269
15	349	M	+/+	McB-DSS	0.108	0.619	0.171	6.6	5.8	0.363636	2.08418	0.575758	29.4828
16	375	M	-/-	McB-DSS	0.106	0.429	0.186	6.9	6.2	0.373239	1.51056	0.65493	30
17	333	M	-/-	McB-DSS	0.118	0.945	0.172	7.1	6.5	0.4	3.20339	0.583051	26.4615
18	353	M	+/+	McB-DSS	0.081	0.497	0.123	6.9	6.4	0.324	1.988	0.492	19.2188
19	389	M	-/-	Reference-Water	0.074	0.313	0.14	9.3	8.4	0.25784	1.09059	0.487805	16.6667
20	419	M	-/-	Reference-Water	0.115	0.29	0.153	7.4	6.9	0.413669	1.04317	0.55036	22.1739
20	423	M	+/+	Reference-Water	0.085	0.262	0.137	8.1	7.4	0.300353	0.925795	0.484099	18.5135
21	381	M	+/+	Reference-DSS	0.077	0.294	0.158	7	6.5	0.241379	0.92163	0.495298	24.3077
21	385	M	-/-	Reference-DSS	0.103	0.37	0.176	5.8	4.6	0.323899	1.16352	0.553459	38.2609
22	413	M	-/-	Reference-DSS	0.063		0.153	6.9	6	0.287671		0.69863	25.5
23	401	M	-/-	McB-Water	0.088	0.516	0.161	9.7	8.8	0.277603	1.62776	0.507886	18.2955
24	409	M	+/+	McB-Water	0.083	0.445	0.166	7.8	7.3	0.29021	1.55594	0.58042	22.7397
25	379	M	+/+	McB-DSS	0.089	0.457	0.154	8	6.7	0.289902	1.4886	0.501629	22.9851
26	393	M	-/-	McB-DSS	0.163	0.128	0.171	5.9	5.4	0.652	0.512	0.684	31.6667
26	395	M	-/-	McB-DSS	0.133	0.445	0.192	6	5.5	0.457045	1.52921	0.659794	34.9091
27	431	M	-/-	McB-DSS	0.116	0.553	0.173	7.3	6.7	0.384106	1.83113	0.572848	25.8209
28	435	M	-/-	Reference-DSS	0.136	0.242	0.16	6.5	6	0.469127	0.834771	0.551914	26.6667
29	437	M	-/-	Reference-DSS	0.159	0.201	0.11	5.5	5	0.576087	0.728261	0.398551	22
30	441	M	-/-	McB-Water	0.129	0.456	0.155	9	8.5	0.434343	1.53535	0.521886	18.2353
30	445	M	-/-	McB-Water	0.11	0.286	0.152	9.3	8.8	0.385965	1.00351	0.533333	17.2727
30	447	M	-/-	McB-Water	0.107	0.355	0.167	8.5	8	0.363946	1.20748	0.568027	20.875
31	459	M	+/+	Reference-Water	0.073	0.216	0.109	7.4	6.9	0.274436	0.81203	0.409774	15.7971
32	467	M	-/-	Reference-Water	0.079	0.333	0.134	7.6	7.1	0.255663	1.07767	0.433657	18.8732
33	475	M	-/-	Reference-DSS	0.106	0.178	0.144	5.5	5	0.370629	0.622378	0.503497	28.8
33	477	M	-/-	Reference-DSS	0.209	0.18	0.157	5.6	5.1	0.771218	0.664207	0.579336	30.7843
33	479	M	+/+	Reference-DSS	0.222	0.28	0.159	5.4	4.9	0.884462	1.11554	0.633466	32.449
33	483	M	+/+	Reference-DSS	0.126	0.407	0.163	5.9	5.4	0.410423	1.32573	0.530945	30.1852
33	485	M	-/-	Reference-DSS	0.134	0.283	0.156	6.2	5.7	0.476868	1.00712	0.55516	27.3684
34	487	M	-/-	McB-DSS	0.105	0.339	0.174	7.6	7.1	0.358362	1.157	0.593857	24.507
34	489	M	+/+	McB-DSS	0.102	0.394	0.182	7.9	7.4	0.333333	1.28758	0.594771	24.5946
34	491	M	-/-	McB-DSS	0.13	0.347	0.154	6.8	6.3	0.454545	1.21329	0.538462	24.4444
34	493	M	+/+	McB-DSS	0.113	0.45	0.192	8.1	7.6	0.379195	1.51007	0.644295	25.2632
34	495	M	+/+	McB-DSS	0.108	0.426	0.201	7.2	6.7	0.377622	1.48951	0.702797	30
35	529	M	+/+	Reference-DSS	0.098	0.484	0.149	5.8	5.3	0.314103	1.55128	0.477564	28.1132
36	533	M	+/+	McB-DSS	0.106	0.609	0.195	8.3	7.8	0.343042	1.97087	0.631068	25
37	527	M	-/-	Reference-Water	0.083	0.35	0.169	7.6	7	0.238506	1.00575	0.485632	24.1429
38	551	M	-/-	Reference-Water	0.065	0.336	0.149	7.7	7.2	0.251938	1.30233	0.577519	20.6944
39	563	M	-/-	McB-Water	0.151	0.494	0.141	10.2	9.7	0.557196	1.82288	0.520295	14.5361
39	567	M	-/-	McB-Water	0.095	0.501	0.182	9.8	9.3	0.335689	1.77032	0.64311	19.5699
40	517	M	+/+	Reference-Water	0.085	0.167	0.129	8.1	7.7	0.309091	0.607273	0.469091	16.7532
40	519	M	+/+	Reference-Water	0.092	0.259	0.119	7.8	7.2	0.279635	0.787234	0.361702	16.5278
40	521	M	+/+	Reference-Water	0.06	0.311	0.114	7.7	7.2	0.253165	1.31224	0.481013	15.8333
41	561	M	+/+	McB-Water	0.082	0.416	0.143	9.2	8.7	0.326693	1.65737	0.569721	16.4368
42	535	M	+/+	McB-Water	0.152	0.36	0.194	9.8	9.2	0.449704	1.06509	0.573964	21.087
42	537	M	+/+	McB-Water	0.0201	0.325	0.171	8.4	7.9	0.0594675	0.961538	0.505917	21.6456

## Sheet: Histology
Cage_ID	Mouse_ID	Sex	Genotype	Group	Inflammation	Extent	Crypt damage	Area	Score
5	339	M	+/+	Reference-Water	1	1	0	1	2
6	359	M	-/-	Reference-Water	0	0	0	1	0
7	371	M	-/-	Reference-Water	1	1	0	1	2
8	363	M	-/-	Reference-DSS	3	3	3	4	36
8	361	M	+/+	Reference-DSS	3	3	4	4	40
9	351	M	+/+	Reference-DSS	3	3	3	4	36
10	325	M	-/-	Reference-DSS	3	3	2	4	32
11	331	M	-/-	McB-Water	1	0	0	1	1
12	373	M	-/-	McB-Water	0	0	0	1	0
13	341	M	+/+	McB-Water	0	0	0	1	0
14	357	M	+/+	McB-Water	0	0	0	1	0
19	345	M	-/-	McB-DSS	2	2	1	4	20
15	349	M	+/+	McB-DSS	3	3	2	3	24
16	375	M	-/-	McB-DSS	3	2	2	3	21
17	333	M	-/-	McB-DSS	3	2	2	3	21
18	353	M	+/+	McB-DSS	2	2	1	3	15
19	389	M	-/-	Reference-Water	1	1	0	1	2
20	419	M	-/-	Reference-Water	0	0	0	1	0
20	423	M	+/+	Reference-Water	1	1	0	1	2
21	381	M	+/+	Reference-DSS	3	3	3	4	36
21	385	M	-/-	Reference-DSS	3	3	4	4	40
22	413	M	-/-	Reference-DSS	3	3	3	4	36
23	401	M	-/-	McB-Water	1	1	0	1	2
24	409	M	+/+	McB-Water	0	0	0	1	0
25	379	M	+/+	McB-DSS	2	3	1	3	18
26	393	M	-/-	McB-DSS	3	3	2	4	32
26	395	M	-/-	McB-DSS	3	3	3	3	27
27	431	M	-/-	McB-DSS	2	1	1	3	12
28	435	M	-/-	Reference-DSS	3	3	3	4	36
29	437	M	-/-	Reference-DSS	3	2	2	4	28
30	441	M	-/-	McB-Water	1	1	0	1	2
30	445	M	-/-	McB-Water	1	1	0	1	2
30	447	M	-/-	McB-Water	0	0	0	1	0
31	459	M	+/+	Reference-Water	1	1	0	1	2
32	467	M	-/-	Reference-Water	0	0	0	1	0
33	475	M	-/-	Reference-DSS	3	3	4	4	40
33	477	M	-/-	Reference-DSS	3	3	4	4	40
33	479	M	+/+	Reference-DSS	3	3	2	4	32
33	483	M	+/+	Reference-DSS	3	3	2	4	32
33	485	M	-/-	Reference-DSS	3	3	3	4	36
34	487	M	-/-	McB-DSS	2	2	2	3	18
34	489	M	+/+	McB-DSS	1	1	1	3	9
34	491	M	-/-	McB-DSS	2	2	2	4	24
34	493	M	+/+	McB-DSS	2	1	2	3	15
34	495	M	+/+	McB-DSS	3	2	2	3	21
35	529	M	+/+	Reference-DSS	3	2	3	4	32
36	533	M	+/+	McB-DSS	3	2	2	4	28
37	527	M	-/-	Reference-Water	0	0	0	1	0
38	551	M	-/-	Reference-Water	0	0	0	1	0
39	563	M	-/-	McB-Water	0	0	0	1	0
39	567	M	-/-	McB-Water	1	1	0	1	2
40	517	M	+/+	Reference-Water	0	0	0	1	0
40	519	M	+/+	Reference-Water	1	1	0	1	2
40	521	M	+/+	Reference-Water	1	1	0	1	2
41	561	M	+/+	McB-Water	1	1	0	1	2
42	535	M	+/+	McB-Water	0	0	0	1	0
42	537	M	+/+	McB-Water	0	0	0	1	0

## Sheet: DAS calculation
					D0						D1						D2						D3						D4						D5
Cage_ID	Mouse_ID	Sex	Genotype	Group	%BW loss	Stool consistency	Blood	BW score	Stool Score	Total	%BW loss	Stool consistency	Blood	BW score	Stool Score	Total	%BW loss	Stool consistency	Blood	BW score	Stool Score	Total	%BW loss	Stool consistency	Blood	BW score	Stool Score	Total	%BW loss	Stool consistency	Blood	BW score	Stool Score	Total	%BW loss	Stool consistency	Blood	BW score	Stool Score	Total
5	339	M	+/+	Reference-Water	0	N	0	0	0	0	3.20513	N	0	0	0	0	2.88462	N	0	0	0	0	1.92308	N	0	0	0	0	0.641026	N	0	0	0	0	4.48718	N	0	0	0	0
6	359	M	-/-	Reference-Water	0	N	0	0	0	0	-0.911854	N	0	0	0	0	0.607903	N	0	0	0	0	3.03951	N	0	0	0	0	2.73556	N	0	0	0	0	3.95137	N	0	0	0	0
7	371	M	-/-	Reference-Water	0	N	0	0	0	0	0.341297	N	0	0	0	0	1.70648	N	0	0	0	0	0.682594	N	0	0	0	0	1.36519	N	0	0	0	0	4.09556	N	0	0	0	0
8	363	M	-/-	Reference-DSS	0	N	0	0	0	0	-0.769231			0	0	0	-5.76923	M	1	2	1	4	-5.76923	L	3	2	2	7	-9.23077	D	3	2	4	9	-15.7692	D	4	4	4	12
8	361	M	+/+	Reference-DSS	0	N	0	0	0	0	-4.29688	M	1	2	1	4	-10.9375	L	3	3	2	8	-12.8906	L	3	3	2	8	-17.1875	D	3	4	4	11	-23.0469	D	4	4	4	12
9	351	M	+/+	Reference-DSS	0	N	0	0	0	0	-1.33929	M	0	1	1	2	-4.91071	L	1	2	2	5	-9.375	M	3	2	1	6	-11.6071	L	2	3	2	7	-16.0714	D	4	4	4	12
10	325	M	-/-	Reference-DSS	0	N	0	0	0	0	0.285714	M	0	0	1	1	-0.571429	L	1	0	2	3	-1.42857	L	2	1	2	5	-7.14286	L	3	2	2	7	-12.5714	D	3	3	4	10
11	331	M	-/-	McB-Water	0	N	0	0	0	0	-1.90736	N	0	1	0	1	-0.817439	N	0	0	0	0	0.817439	N	0	0	0	0	0.544959	N	0	0	0	0	3.26975	N	0	0	0	0
12	373	M	-/-	McB-Water	0	N	0	0	0	0	-3.42466	N	0	1	0	1	-4.79452	N	0	2	0	2	-1.36986	N	0	1	0	1	-2.39726	N	0	1	0	1	-1.0274	N	0	1	0	1
13	341	M	+/+	McB-Water	0	N	0	0	0	0	-1.59744	N	0	1	0	1	-2.23642	N	0	1	0	1	-2.8754	N	0	1	0	1	-2.8754	N	0	1	0	1	-2.8754	N	0	1	0	1
14	357	M	+/+	McB-Water	0	N	0	0	0	0	1.62338	N	0	0	0	0	0.974026	N	0	0	0	0	-1.2987	N	0	1	0	1	-0.974026	N	0	0	0	0	-1.2987	N	0	1	0	1
19	345	M	-/-	McB-DSS	0	N	0	0	0	0	-1.37363	M	0	1	1	2	-2.74725	M	0	1	1	2	-2.47253	L	1	1	2	4	-4.3956	L	0	2	2	4	-4.12088	L	1	2	2	5
15	349	M	+/+	McB-DSS	0	N	0	0	0	0	2.13415	M	0	0	1	1	2.43902	L	0	0	2	2	1.21951	M	2	0	1	3	-2.13415	L	2	1	2	5	-9.45122	L	2	2	2	6
16	375	M	-/-	McB-DSS	0	N	0	0	0	0	1.63934	M	0	0	1	1	-1.31148	M	0	1	1	2	-4.2623	L	1	2	2	5	-4.91803	L	3	2	2	7	-6.88525	L	3	2	2	7
17	333	M	-/-	McB-DSS	0	N	0	0	0	0	0	N	0	0	0	0	-4.89297	M	0	2	1	3	-7.33945	L	1	2	2	5	-7.95107	L	1	2	2	5	-9.78593	L	2	2	2	6
18	353	M	+/+	McB-DSS	0	N	0	0	0	0	-0.395257	N	0	0	0	0	-2.37154	N	0	1	0	1	-0.790514	M	1	0	1	2	1.58103	M	2	0	1	3	-1.18577	M	2	1	1	4
19	389	M	-/-	Reference-Water	0	N	0	0	0	0	0.358423	N	0	0	0	0	1.79211	N	0	0	0	0	2.86738	N	0	0	0	0	1.07527	N	0	0	0	0	2.86738	N	0	0	0	0
20	419	M	-/-	Reference-Water	0	N	0	0	0	0	4.65116	N	0	0	0	0	4.26357	M	0	0	1	1	6.20155	N	0	0	0	0	7.36434	N	0	0	0	0	7.75194	N	0	0	0	0
20	423	M	+/+	Reference-Water	0	N	0	0	0	0	2.16606	N	0	0	0	0	3.2491	N	0	0	0	0	2.88809	M	0	0	1	1	1.80505	M	0	0	1	1	2.16606	N	0	0	0	0
21	381	M	+/+	Reference-DSS	0	N	0	0	0	0	0	D	0	0	4	4	-1.27389	M	0	1	1	2	4.77707	M	0	0	1	1	1.59236	M	1	0	1	2	1.59236	M	1	0	1	2
21	385	M	-/-	Reference-DSS	0	N	0	0	0	0	-2.28571	L	0	1	2	3	-2	L	0	1	2	3	-2	L	0	1	2	3	-3.14286	M	2	1	1	4	-9.14286	D	4	2	4	10
22	413	M	-/-	Reference-DSS	0	N	0	0	0	0	-1.87266	L	0	1	2	3	-4.49438	D	2	2	4	8	-11.6105	D	4	3	4	11	-17.9775					12	0			0	0	12
23	401	M	-/-	McB-Water	0	N	0	0	0	0	-2.53968	N	0	1	0	1	-3.1746	N	0	1	0	1	-0.31746	N	0	0	0	0	-0.634921	M	0	0	1	1	0.634921	N	0	0	0	0
24	409	M	+/+	McB-Water	0	N	0	0	0	0	-1.68919	N	0	1	0	1	-2.36486	N	0	1	0	1	-3.37838	N	0	1	0	1	-2.36486	N	0	1	0	1	-3.37838	N	0	1	0	1
25	379	M	+/+	McB-DSS	0	N	0	0	0	0	-1.88088	M	0	1	1	2	-2.82132	M	0	1	1	2	-1.88088	M	0	1	1	2	-3.76176	M	1	1	1	3	-3.76176	M	1	1	1	3
26	393	M	-/-	McB-DSS	0	N	0	0	0	0	0.331126	L	0	0	2	2	-0.993377	L´	2	0	0	2	-3.64238	L	2	1	2	5	-8.9404	L	2	2	2	6	-17.2185	D	3	4	4	11
26	395	M	-/-	McB-DSS	0	N	0	0	0	0	-0.668896	L	0	0	2	2	-3.01003	M	0	1	1	2	-0.334448	L	2	0	2	4	0	M	1	0	1	2	-2.67559	D	2	1	4	7
27	431	M	-/-	McB-DSS	0	N	0	0	0	0	2.06897	M	0	0	1	1	4.82759	M	0	0	1	1	3.10345	M	1	0	1	2	0.689655	M	2	0	1	3	4.13793	M	1	0	1	2
28	435	M	-/-	Reference-DSS	0	N	0	0	0	0	2.14724	L	0	0	2	2	-0.306748	L	0	0	2	2	-3.68098	L	1	1	2	4	-6.13497	L	2	2	2	6	-11.0736	L	4	3	2	9
29	437	M	-/-	Reference-DSS	0	N	0	0	0	0	0.877193	L	0	0	2	2	-1.16959	L	1	1	2	4	-6.14035	L	1	2	2	5	-12.2807	D	3	3	4	10	-19.2982	D	4	4	4	12
30	441	M	-/-	McB-Water	0	N	0	0	0	0	1.40351	N	0	0	0	0	1.75439	N	0	0	0	0	0.350877	M	0	0	1	1	3.85965	N	0	0	0	0	4.21053	N	0	0	0	0
30	445	M	-/-	McB-Water	0	N	0	0	0	0	0	N	0	0	0	0	-1.71821	M	0	1	1	2	-2.74914	M	0	1	1	2	-1.71821	N	0	1	0	1	-2.06186	N	0	1	0	1
30	447	M	-/-	McB-Water	0	N	0	0	0	0	0	N	0	0	0	0	-0.677966	N	0	0	0	0	-1.35593	M	0	1	1	2	-1.35593	N	0	1	0	1	-0.338983	N	0	0	0	0
31	459	M	+/+	Reference-Water	0	N	0	0	0	0	3.37079	N	0	0	0	0	1.1236	N	0	0	0	0	-1.1236	N	0	1	0	1	-0.749064	N	0	0	0	0	-0.374532	N	0	0	0	0
32	467	M	-/-	Reference-Water	0	N	0	0	0	0	1.94175	N	0	0	0	0	-0.970874	N	0	0	0	0	-2.91262	N	0	1	0	1	-2.91262	N	0	1	0	1	0	N	0	0	0	0
33	475	M	-/-	Reference-DSS	0	N	0	0	0	0	0.887574	L	0	0	2	2	2.07101	L	0	0	2	2	0.295858	L	1	0	2	3	-5.6213	D	4	2	4	10	-15.3846	D	4	4	4	12
33	477	M	-/-	Reference-DSS	0	N	0	0	0	0	1.90476	L	1	0	2	3	1.90476	L	0	0	2	2	-1.5873	L	1	1	2	4	-5.71429	L	4	2	2	8	-13.9683	D	4	3	4	11
33	479	M	+/+	Reference-DSS	0	N	0	0	0	0	-3.10559	L	0	1	2	3	-2.79503	L	1	1	2	4	-9.62733	L	3	2	2	7	-12.7329	L	4	3	2	9	-22.0497	D	4	4	4	12
33	483	M	+/+	Reference-DSS	0	N	0	0	0	0	2.77778	L	1	0	2	3	-0.308642	L	0	0	2	2	-2.46914	L	1	1	2	4	-1.85185	L	2	1	2	5	-5.24691	L	3	2	2	7
33	485	M	-/-	Reference-DSS	0	N	0	0	0	0	1.53846	L	0	0	2	2	-0.615385	L	1	0	2	3	-1.53846	L	1	1	2	4	-6.15385	L	3	2	2	7	-13.5385	L	4	3	2	9
34	487	M	-/-	McB-DSS	0	N	0	0	0	0	-0.647249	M	0	0	1	1	0.970874	L	0	0	2	2	-0.970874	L	1	0	2	3	-3.55987	L	2	1	2	5	-5.17799	L	2	2	2	6
34	489	M	+/+	McB-DSS	0	N	0	0	0	0	0	M	0	0	1	1	3.18471	M	0	0	1	1	1.59236	L	1	0	2	3	-1.27389	M	1	1	1	3	-2.54777	N	2	1	0	3
34	491	M	-/-	McB-DSS	0	N	0	0	0	0	0.338983	M	0	0	1	1	2.0339	M	0	0	1	1	1.69492	M	1	0	1	2	0	L	1	0	2	3	-3.05085	M	2	1	1	4
34	493	M	+/+	McB-DSS	0	N	0	0	0	0	0	M	0	0	1	1	2.32558	M	0	0	1	1	0.332226	M	0	0	1	1	0.332226	L	0	0	2	2	-0.996678	M	1	0	1	2
34	495	M	+/+	McB-DSS	0	N	0	0	0	0	0.657895	M	0	0	1	1	-0.986842	M	0	0	1	1	-1.31579	L	0	1	2	3	-2.30263	L	2	1	2	5	-5.92105	M	2	2	1	5
35	529	M	+/+	Reference-DSS	0	N	0	0	0	0	0	M	1	0	1	2	0.3125	M	1	0	1	2	-0.3125	M	1	0	1	2	0	M	1	0	1	2	-2.5	L	2	1	2	5
36	533	M	+/+	McB-DSS	0	N	0	0	0	0	0.636943	M	0	0	1	1	0.636943	M	1	0	1	2	-3.18471	M	1	1	1	3	0.318471	M	1	0	1	2	-1.59236	M	1	1	1	3
37	527	M	-/-	Reference-Water	0	N	0	0	0	0	2.35294	N	0	0	0	0	0.588235	N	0	0	0	0	1.76471	N	0	0	0	0	2.05882	N	0	0	0	0	2.35294	N	0	0	0	0
38	551	M	-/-	Reference-Water	0	N	0	0	0	0	-1.16732	N	0	1	0	1	-1.55642	N	0	1	0	1	1.55642	N	0	0	0	0	2.33463	N	0	0	0	0	0.389105	N	0	0	0	0
39	563	M	-/-	McB-Water	0	N	0	0	0	0	-2.25564	N	0	1	0	1	0	N	0	0	0	0	1.8797	N	0	0	0	0	1.50376	N	0	0	0	0	1.8797	N	0	0	0	0
39	567	M	-/-	McB-Water	0	N	0	0	0	0	-0.701754	M	0	0	1	1	-2.10526	M	0	1	1	2	-1.05263	N	0	1	0	1	-0.701754	N	0	0	0	0	-0.701754	N	0	0	0	0
40	517	M	+/+	Reference-Water	0	N	0	0	0	0	2.52708	M	0	0	1	1	2.52708	N	0	0	0	0	1.08303	N	0	0	0	0	0	N	0	0	0	0	-0.722022	N	0	0	0	0
40	519	M	+/+	Reference-Water	0	N	0	0	0	0	2.18069	N	0	0	0	0	3.42679	N	0	0	0	0	2.80374	N	0	0	0	0	3.11526	N	0	0	0	0	2.49221	N	0	0	0	0
40	521	M	+/+	Reference-Water	0	N	0	0	0	0	10.3825	N	0	0	0	0	15.847	N	0	0	0	0	21.3115	N	0	0	0	0	21.8579	N	0	0	0	0	29.5082	N	0	0	0	0
41	561	M	+/+	McB-Water	0	N	0	0	0	0	-0.796813	N	0	0	0	0	-1.99203	N	0	1	0	1	-1.19522	N	0	1	0	1	1.99203	N	0	0	0	0	0	N	0	0	0	0
42	535	M	+/+	McB-Water	0	N	0	0	0	0	3.27381	N	0	0	0	0	1.19048	M	0	0	1	1	0.297619	M	0	0	1	1	1.4881	N	0	0	0	0	0.595238	N	0	0	0	0
42	537	M	+/+	McB-Water	0	N	0	0	0	0	2.1148	N	0	0	0	0	2.1148	N	0	0	0	0	1.51057	N	1	0	0	1	3.32326	N	1	0	0	1	2.1148	N	1	0	0	1
