# Supplementary material for: Microbial Activation of the GLP-2R Mitigates Gastrointestinal Inflammation
Source: Research Square preprint supplement (doi:10.21203/rs.3.rs-6973437/v1), 2025-07-09
Supplement: Supplementary file 6 [file 840259e773eb2cedeabbcc02.xlsx]

## Sheet: Readme
THIS SHEET CONTAIN METADATA FROM MICE USED IN FIGURE 5 REGARDING GLP-2R WT AND KO MICE IN EXPERIMENTAL COLITIS
Histological Scoring system
	Feature	Grade	Description
	Inflammation	0	None
		1	Slight
		2	Moderate
		3	Severe
	Extent	0	None
		1	Partial mucosa
		2	Full mucosa
		3	Muosa + submucosa
	Crypt damage	0	None
		1	1/3
		2	2/3
		3	Only surface epithelium remaining
		4	Entire epithelium lost
	Area involved	1	1-25%
		2	26-50%
		3	51-75%
		4	76-100%
Disease activity index

## Sheet: Body parameters
	Cage_ID	Mouse_ID	Sex	Genotype	Group	D-7	D0	D1	D2	D3	D4	D5
	1	305	M	-/-	CD-Water	22.5	23.8	23.7	24.1	23.8	24.2	24.4
	2	315	M	-/-	CD-Water	24.6	24.9	25.8	25.6	25.3	25.6	25.8
	3	261	M	+/+	CD-Water	32.6	31.4	31.3	31.3	32	31.3	31.7
	4	283	M	-/-	CD-DSS	28.6	29.3	28.7	27.8	27.8	23.8
	4	285	M	-/-	CD-DSS	26.3	27.3	26.8	25.9	26.6	26.3	23.5
	4	287	M	+/+	CD-DSS	30.3	31.8	31.4	31.2	30.9	30.2	28.4
	5	265	M	-/-	CDmcb-Water	33.4	33.7	33.5	33.6	33.2	33.3	33.2
	5	267	M	+/+	CDmcb-Water	32.1	33	32.8	33.3	32.9	32.5	32.8
	5	269	M	+/+	CDmcb-Water	33.7	34.6	34.8	34.6	34.8	34.3	34.6
	6	291	M	+/+	CDmcb-DSS	26.4	28.4	28.3	28.6	28.8	28.1	27.6
	6	293	M	+/+	CDmcb-DSS	28.5	29.7	29.7	29.7	30.1	29.1	27.3
	7	299	M	-/-	CDmcb-DSS	26.9	28.5	27.9	27.9	28.1	25.6	23.2
	7	303	M	-/-	CDmcb-DSS	24.6	27.1	27	27.3	27.8	28.7	27.1
	8	335	M	-/-	CDmcb-DSS	31.4	30.7	30.5	31	30.7	29.4	27.8
	8	337	M	+/+	CDmcb-DSS	31.3	30.9	31.3	31.4	31.1	30.7	30.2
	9	359	M	-/-	CDmcb-DSS	29	28.7	29.2	29	29.1	29	25.4
	9	361	M	-/-	CDmcb-DSS	30.7	31.5	32.2	31.6	30.7	30.2	27.4
	9	363	M	+/+	CDmcb-DSS	33.4	33.7	34	33.8	32.8	30.2	26.3
	10	341	M	+/+	CDmcb-Water	25.9	25.5	25.5	25	24.9	24.8	24.9
	11	343	M	+/+	CDmcb-Water	26.6	27.4	28.2	28.2	27.7	27.7	26.9
	11	347	M	-/-	CDmcb-Water	28.3	29.5	29	28.8	28.8	28.6	28.7
	11	349	M	-/-	CDmcb-Water	28.3	29	29.3	29.7	29	29.3	29.3
	12	345	M	-/-	CD-DSS	26.5	25.4	25.5	25.9	25.3	25.1	24.8
	13	367	M	+/+	CD-DSS	29.9	30.5	30	30.3	30.1	29.6	26.9
	13	369	M	+/+	CD-DSS	29	29.4	28.6	29.3	29.9	28.9	27.1
	13	371	M	+/+	CD-DSS	30.5	30.5	30.5	31	30.8	30.3	29.3
	13	373	M	+/+	CD-DSS	27.4	25.7	25.5	26	26.5	25.8	24.6
	14	481	M	-/-	CD-DSS	28.7	29.6	29.3	28.9	28.7	26.8	24.7
	14	483	M	-/-	CD-DSS	31.1	30.2	29.5	29.1	24.3	24.3	24.3
	15	485	M	-/-	CDmcb-DSS	25.2	25.6	25.3	25.1	24.4	24.7	25.1
	16	487	M	+/+	CD-Water	28.7	28.9	28.3	28.2	28	28.5	28.9
	16	491	M	+/+	CD-Water	29.2	29	28.4	29	28.6	28.7	28.9
	17	493	M	+/+	CDmcb-Water	30.9	31.1	31.2	31	31.1	30.8	31.5
	17	495	M	-/-	CDmcb-Water	27.8	28.7	28.7	28.4	28.1	28	27.7
	17	499	M	-/-	CDmcb-Water	27.9	27.3	27.6	27.5	27.4	27.8	27.6
	18	503	M	-/-	CD-Water	26.6	26.2	25.6	25.2	24.7	24.7	24.8
	19	509	M	-/-	CD-Water	27.7	27.2	26.8	27.2	28.3	28.5	28.6
	19	511	M	+/+	CD-Water	30.6	30.1	29.4	28.9	29.5	29.8	29.9
	20	515	M	+/+	CD-Water	26.6	27.4	27	26.8	26.9	27.2	27.4
	20	519	M	+/+	CD-Water	23.4	24.6	23.7	24.2	24.4	24.1	24.2
	20	521	M	-/-	CD-Water	25	26.2	26.1	26	26.3	26.8	26.8
	21	45	M	-/-	CDmcb-DSS	26.7	25.9	25.3	25.1	24.8	23.4	21.9
	22	46	M	+/+	CDmcb-DSS	23.7	24.6	25.2	24.6	24.7	24.8	25
	23	14	M	-/-	CD-DSS	30.4	28.4	29.2	29	29.1	29.5	27.5
	24	25	M	+/+	CD-DSS	27.6	25.7	25.6	25	25	24.6	23.9
	25	75	M	-/-	CDmcb-DSS	27.9	27.7	28.1	27.5	27.4	26.8	25.2
	26	83	M	+/+	CDmcb-DSS	30.9	31.2	31.8	31.1	31.1	30.5	30.6
	27	114	M	+/+	CDmcb-Water	23.2	23.9	24.1	24.4	24.3	24.1	24.5
	27	115	M	+/+	CDmcb-Water	23.6	24.8	25.4	25.2	25.4	25.3	25.4
	27	116	M	+/+	CDmcb-Water	22.2	22.9	23.5	23.6	24	23.3	24
	27	117	M	-/-	CDmcb-Water	24.8	25.1	25.2	26	26.6	26.8	26.6
	27	118	M	-/-	CDmcb-Water	25.7	27.3	27	27.1	27	27	27.7
	28	87	M	+/+	CDmcb-DSS	29.4	30.2	29.6	29.8	29.5	29.8	29.5
	29	121	M	+/+	CDmcb-DSS	27.1	26.8	26.9	26.6	26.8	26.3	26.2
	30	96	M	+/+	CD-DSS	25.3	26.8	26.8	26.4	25.8	24.9	23.6
	31	120	M	+/+	CD-Water	23.1	23.5	25.1	24.7	25.4	25.5	25.7
	31	122	M	+/+	CD-Water	23.7	23.7	23.6	24	24.5	24.8	24.7
	32	88	M	-/-	CD-Water	23.5	23.9	24.2	24.7	25.6	24.9	25.3
	33	84	M	-/-	CD-Water	24.6	24	23.8	24.1	24.4	24.4	24.8
	34	104	M	-/-	CD-DSS	24	23.5	24.2	23.5	23	23.3	22.8
	35	128	M	-/-	CD-DSS	24.7	25.7	26.1	26.1	25.7	25.4	23.8
	36	91	M	+/+	CD-DSS	30.8	29.7	29.4	29.5	28.3	26	23.4
	36	92	M	+/+	CD-DSS	28.1	28.2	27.3	27.5	27.2	24.3	24.3

## Sheet: Weight gain
Cage_ID	Mouse_ID	Sex	Genotype	Group	D0	D1	D2	D3	D4	D5
1	305	M	-/-	CD-Water	0	-0.1	0.3	0	0.4	0.6
2	315	M	-/-	CD-Water	0	0.9	0.7	0.4	0.7	0.9
3	261	M	+/+	CD-Water	0	-0.1	-0.1	0.6	-0.1	0.3
4	283	M	-/-	CD-DSS	0	-0.6	-1.5	-1.5	-5.5
4	285	M	-/-	CD-DSS	0	-0.5	-1.4	-0.7	-1	-3.8
4	287	M	+/+	CD-DSS	0	-0.4	-0.6	-0.9	-1.6	-3.4
5	265	M	-/-	CDmcb-Water	0	-0.2	-0.1	-0.5	-0.4	-0.5
5	267	M	+/+	CDmcb-Water	0	-0.2	0.3	-0.1	-0.5	-0.2
5	269	M	+/+	CDmcb-Water	0	0.2	0	0.2	-0.3	0
6	291	M	+/+	CDmcb-DSS	0	-0.1	0.2	0.4	-0.3	-0.8
6	293	M	+/+	CDmcb-DSS	0	0	0	0.4	-0.6	-2.4
7	299	M	-/-	CDmcb-DSS	0	-0.6	-0.6	-0.4	-2.9	-5.3
7	303	M	-/-	CDmcb-DSS	0	-0.1	0.2	0.7	1.6	0
8	335	M	-/-	CDmcb-DSS	0	-0.2	0.3	0	-1.3	-2.9
8	337	M	+/+	CDmcb-DSS	0	0.4	0.5	0.2	-0.2	-0.7
9	359	M	-/-	CDmcb-DSS	0	0.5	0.3	0.4	0.3	-3.3
9	361	M	-/-	CDmcb-DSS	0	0.7	0.1	-0.8	-1.3	-4.1
9	363	M	+/+	CDmcb-DSS	0	0.3	0.1	-0.9	-3.5	-7.4
10	341	M	+/+	CDmcb-Water	0	0	-0.5	-0.6	-0.7	-0.6
11	343	M	+/+	CDmcb-Water	0	0.8	0.8	0.3	0.3	-0.5
11	347	M	-/-	CDmcb-Water	0	-0.5	-0.7	-0.7	-0.9	-0.8
11	349	M	-/-	CDmcb-Water	0	0.3	0.7	0	0.3	0.3
12	345	M	-/-	CD-DSS	0	0.1	0.5	-0.1	-0.3	-0.6
13	367	M	+/+	CD-DSS	0	-0.5	-0.2	-0.4	-0.9	-3.6
13	369	M	+/+	CD-DSS	0	-0.8	-0.1	0.5	-0.5	-2.3
13	371	M	+/+	CD-DSS	0	0	0.5	0.3	-0.2	-1.2
13	373	M	+/+	CD-DSS	0	-0.2	0.3	0.8	0.1	-1.1
14	481	M	-/-	CD-DSS	0	-0.3	-0.7	-0.9	-2.8	-4.9
14	483	M	-/-	CD-DSS	0	-0.7	-1.1	-5.9	-5.9	-5.9
15	485	M	-/-	CDmcb-DSS	0	-0.3	-0.5	-1.2	-0.9	-0.5
16	487	M	+/+	CD-Water	0	-0.6	-0.7	-0.9	-0.4	0
16	491	M	+/+	CD-Water	0	-0.6	0	-0.4	-0.3	-0.1
17	493	M	+/+	CDmcb-Water	0	0.1	-0.1	0	-0.3	0.4
17	495	M	-/-	CDmcb-Water	0	0	-0.3	-0.6	-0.7	-1
17	499	M	-/-	CDmcb-Water	0	0.3	0.2	0.1	0.5	0.3
18	503	M	-/-	CD-Water	0	-0.6	-1	-1.5	-1.5	-1.4
19	509	M	-/-	CD-Water	0	-0.4	0	1.1	1.3	1.4
19	511	M	+/+	CD-Water	0	-0.7	-1.2	-0.6	-0.3	-0.2
20	515	M	+/+	CD-Water	0	-0.4	-0.6	-0.5	-0.2	0
20	519	M	+/+	CD-Water	0	-0.9	-0.4	-0.2	-0.5	-0.4
20	521	M	-/-	CD-Water	0	-0.1	-0.2	0.1	0.6	0.6
21	45	M	-/-	CDmcb-DSS	0	-0.6	-0.8	-1.1	-2.5	-4
22	46	M	+/+	CDmcb-DSS	0	0.6	0	0.1	0.2	0.4
23	14	M	-/-	CD-DSS	0	0.8	0.6	0.7	1.1	-0.9
24	25	M	+/+	CD-DSS	0	-0.1	-0.7	-0.7	-1.1	-1.8
25	75	M	-/-	CDmcb-DSS	0	0.4	-0.2	-0.3	-0.9	-2.5
26	83	M	+/+	CDmcb-DSS	0	0.6	-0.1	-0.1	-0.7	-0.6
27	114	M	+/+	CDmcb-Water	0	0.2	0.5	0.4	0.2	0.6
27	115	M	+/+	CDmcb-Water	0	0.6	0.4	0.6	0.5	0.6
27	116	M	+/+	CDmcb-Water	0	0.6	0.7	1.1	0.4	1.1
27	117	M	-/-	CDmcb-Water	0	0.1	0.9	1.5	1.7	1.5
27	118	M	-/-	CDmcb-Water	0	-0.3	-0.2	-0.3	-0.3	0.4
28	87	M	+/+	CDmcb-DSS	0	-0.6	-0.4	-0.7	-0.4	-0.7
29	121	M	+/+	CDmcb-DSS	0	0.1	-0.2	0	-0.5	-0.6
30	96	M	+/+	CD-DSS	0	0	-0.4	-1	-1.9	-3.2
31	120	M	+/+	CD-Water	0	1.6	1.2	1.9	2	2.2
31	122	M	+/+	CD-Water	0	-0.1	0.3	0.8	1.1	1
32	88	M	-/-	CD-Water	0	0.3	0.8	1.7	1	1.4
33	84	M	-/-	CD-Water	0	-0.2	0.1	0.4	0.4	0.8
34	104	M	-/-	CD-DSS	0	0.7	0	-0.5	-0.2	-0.7
35	128	M	-/-	CD-DSS	0	0.4	0.4	0	-0.3	-1.9
36	91	M	+/+	CD-DSS	0	-0.3	-0.2	-1.4	-3.7	-6.3
36	92	M	+/+	CD-DSS	0	-0.9	-0.7	-1	-3.9	-3.9

## Sheet: WeightPct
Cage_ID	Mouse_ID	Sex	Genotype	Group	D0	D1	D2	D3	D4	D5
1	305	M	-/-	CD-Water	0	-0.420168	1.2605	0	1.68067	2.52101
2	315	M	-/-	CD-Water	0	3.61446	2.81124	1.60643	2.81124	3.61446
3	261	M	+/+	CD-Water	0	-0.318471	-0.318471	1.91083	-0.318471	0.955414
4	283	M	-/-	CD-DSS	0	-2.04778	-5.11945	-5.11945	-18.7713
4	285	M	-/-	CD-DSS	0	-1.8315	-5.12821	-2.5641	-3.663	-13.9194
4	287	M	+/+	CD-DSS	0	-1.25786	-1.88679	-2.83019	-5.03145	-10.6918
5	265	M	-/-	CDmcb-Water	0	-0.593472	-0.296736	-1.48368	-1.18694	-1.48368
5	267	M	+/+	CDmcb-Water	0	-0.606061	0.909091	-0.30303	-1.51515	-0.606061
5	269	M	+/+	CDmcb-Water	0	0.578035	0	0.578035	-0.867052	0
6	291	M	+/+	CDmcb-DSS	0	-0.352113	0.704225	1.40845	-1.05634	-2.8169
6	293	M	+/+	CDmcb-DSS	0	0	0	1.3468	-2.0202	-8.08081
7	299	M	-/-	CDmcb-DSS	0	-2.10526	-2.10526	-1.40351	-10.1754	-18.5965
7	303	M	-/-	CDmcb-DSS	0	-0.369004	0.738007	2.58303	5.90406	0
8	335	M	-/-	CDmcb-DSS	0	-0.651466	0.977199	0	-4.23453	-9.44625
8	337	M	+/+	CDmcb-DSS	0	1.2945	1.61812	0.647249	-0.647249	-2.26537
9	359	M	-/-	CDmcb-DSS	0	1.74216	1.0453	1.39373	1.0453	-11.4983
9	361	M	-/-	CDmcb-DSS	0	2.22222	0.31746	-2.53968	-4.12698	-13.0159
9	363	M	+/+	CDmcb-DSS	0	0.890208	0.296736	-2.67062	-10.3858	-21.9585
10	341	M	+/+	CDmcb-Water	0	0	-1.96078	-2.35294	-2.7451	-2.35294
11	343	M	+/+	CDmcb-Water	0	2.91971	2.91971	1.09489	1.09489	-1.82482
11	347	M	-/-	CDmcb-Water	0	-1.69492	-2.37288	-2.37288	-3.05085	-2.71186
11	349	M	-/-	CDmcb-Water	0	1.03448	2.41379	0	1.03448	1.03448
12	345	M	-/-	CD-DSS	0	0.393701	1.9685	-0.393701	-1.1811	-2.3622
13	367	M	+/+	CD-DSS	0	-1.63934	-0.655738	-1.31148	-2.95082	-11.8033
13	369	M	+/+	CD-DSS	0	-2.72109	-0.340136	1.70068	-1.70068	-7.82313
13	371	M	+/+	CD-DSS	0	0	1.63934	0.983607	-0.655738	-3.93443
13	373	M	+/+	CD-DSS	0	-0.77821	1.16732	3.11284	0.389105	-4.28016
14	481	M	-/-	CD-DSS	0	-1.01351	-2.36486	-3.04054	-9.45946	-16.5541
14	483	M	-/-	CD-DSS	0	-2.31788	-3.64238	-19.5364	-19.5364	-19.5364
15	485	M	-/-	CDmcb-DSS	0	-1.17188	-1.95312	-4.6875	-3.51563	-1.95312
16	487	M	+/+	CD-Water	0	-2.07612	-2.42215	-3.11419	-1.38408	0
16	491	M	+/+	CD-Water	0	-2.06897	0	-1.37931	-1.03448	-0.344828
17	493	M	+/+	CDmcb-Water	0	0.321543	-0.321543	0	-0.96463	1.28617
17	495	M	-/-	CDmcb-Water	0	0	-1.0453	-2.09059	-2.43902	-3.48432
17	499	M	-/-	CDmcb-Water	0	1.0989	0.732601	0.3663	1.8315	1.0989
18	503	M	-/-	CD-Water	0	-2.29008	-3.81679	-5.72519	-5.72519	-5.34351
19	509	M	-/-	CD-Water	0	-1.47059	0	4.04412	4.77941	5.14706
19	511	M	+/+	CD-Water	0	-2.32558	-3.98671	-1.99336	-0.996678	-0.664452
20	515	M	+/+	CD-Water	0	-1.45985	-2.18978	-1.82482	-0.729927	0
20	519	M	+/+	CD-Water	0	-3.65854	-1.62602	-0.813008	-2.03252	-1.62602
20	521	M	-/-	CD-Water	0	-0.381679	-0.763359	0.381679	2.29008	2.29008
21	45	M	-/-	CDmcb-DSS	0	-2.3166	-3.0888	-4.2471	-9.65251	-15.444
22	46	M	+/+	CDmcb-DSS	0	2.43902	0	0.406504	0.813008	1.62602
23	14	M	-/-	CD-DSS	0	2.8169	2.11268	2.46479	3.87324	-3.16901
24	25	M	+/+	CD-DSS	0	-0.389105	-2.72374	-2.72374	-4.28016	-7.00389
25	75	M	-/-	CDmcb-DSS	0	1.44404	-0.722022	-1.08303	-3.2491	-9.02527
26	83	M	+/+	CDmcb-DSS	0	1.92308	-0.320513	-0.320513	-2.24359	-1.92308
27	114	M	+/+	CDmcb-Water	0	0.83682	2.09205	1.67364	0.83682	2.51046
27	115	M	+/+	CDmcb-Water	0	2.41935	1.6129	2.41935	2.01613	2.41935
27	116	M	+/+	CDmcb-Water	0	2.62009	3.05677	4.80349	1.74672	4.80349
27	117	M	-/-	CDmcb-Water	0	0.398406	3.58566	5.9761	6.77291	5.9761
27	118	M	-/-	CDmcb-Water	0	-1.0989	-0.732601	-1.0989	-1.0989	1.4652
28	87	M	+/+	CDmcb-DSS	0	-1.98675	-1.3245	-2.31788	-1.3245	-2.31788
29	121	M	+/+	CDmcb-DSS	0	0.373134	-0.746269	0	-1.86567	-2.23881
30	96	M	+/+	CD-DSS	0	0	-1.49254	-3.73134	-7.08955	-11.9403
31	120	M	+/+	CD-Water	0	6.80851	5.10638	8.08511	8.51064	9.3617
31	122	M	+/+	CD-Water	0	-0.421941	1.26582	3.37553	4.64135	4.21941
32	88	M	-/-	CD-Water	0	1.25523	3.34728	7.11297	4.1841	5.85774
33	84	M	-/-	CD-Water	0	-0.833333	0.416667	1.66667	1.66667	3.33333
34	104	M	-/-	CD-DSS	0	2.97872	0	-2.12766	-0.851064	-2.97872
35	128	M	-/-	CD-DSS	0	1.55642	1.55642	0	-1.16732	-7.393
36	91	M	+/+	CD-DSS	0	-1.0101	-0.673401	-4.7138	-12.4579	-21.2121
36	92	M	+/+	CD-DSS	0	-3.19149	-2.48227	-3.5461	-13.8298	-13.8298

## Sheet: DAS
Cage_ID	Mouse_ID	Sex	Genotype	Group	D0	D1	D2	D3	D4	D5
1	305	M	-/-	CD-Water	0	0	0	0	0	0
2	315	M	-/-	CD-Water	0	1	0	0	0	0
3	261	M	+/+	CD-Water	0	0	0	0	0	0
4	283	M	-/-	CD-DSS	0	5	4	2	12	12
4	285	M	-/-	CD-DSS	0	3	4	4	4	11
4	287	M	+/+	CD-DSS	1	5	3	3	5	11
5	265	M	-/-	CDmcb-Water	0	0	0	1	1	1
5	267	M	+/+	CDmcb-Water	0	0	0	0	1	1
5	269	M	+/+	CDmcb-Water	0	0	0	0	0	0
6	291	M	+/+	CDmcb-DSS	1	2	2	3	3	4
6	293	M	+/+	CDmcb-DSS	0	2	2	3	5	6
7	299	M	-/-	CDmcb-DSS	0	2	3	4	7	9
7	303	M	-/-	CDmcb-DSS	0	1	1	3	4	4
8	335	M	-/-	CDmcb-DSS	0	2	1	3	6	9
8	337	M	+/+	CDmcb-DSS	0	0	1	2	4	7
9	359	M	-/-	CDmcb-DSS	0	3	1	2	4	10
9	361	M	-/-	CDmcb-DSS	0	2	2	3	6	8
9	363	M	+/+	CDmcb-DSS	0	1	2	3	10	12
10	341	M	+/+	CDmcb-Water	0	0	1	1	1	1
11	343	M	+/+	CDmcb-Water	0	0	0	0	0	1
11	347	M	-/-	CDmcb-Water	0	1	1	1	1	1
11	349	M	-/-	CDmcb-Water	0	0	0	0	0	0
12	345	M	-/-	CD-DSS	0	2	1	3	5	8
13	367	M	+/+	CD-DSS	0	3	1	4	5	11
13	369	M	+/+	CD-DSS	0	2	1	4	8	10
13	371	M	+/+	CD-DSS	0	1	3	3	4	6
13	373	M	+/+	CD-DSS	0	1	3	3	4	10
14	481	M	-/-	CD-DSS	1	3	3	4	9	11
14	483	M	-/-	CD-DSS	0	3	5	12	12	12
15	485	M	-/-	CDmcb-DSS	0	3	3	5	4	5
16	487	M	+/+	CD-Water	0	1	1	1	1	0
16	491	M	+/+	CD-Water	0	1	0	1	1	0
17	493	M	+/+	CDmcb-Water	1	0	0	0	0	0
17	495	M	-/-	CDmcb-Water	0	2	3	1	1	1
17	499	M	-/-	CDmcb-Water	0	0	0	0	0	0
18	503	M	-/-	CD-Water	0	1	1	2	2	2
19	509	M	-/-	CD-Water	0	2	1	1	0	0
19	511	M	+/+	CD-Water	0	2	2	1	0	0
20	515	M	+/+	CD-Water	0	1	1	1	0	0
20	519	M	+/+	CD-Water	0	1	1	0	1	1
20	521	M	-/-	CD-Water	1	0	0	0	0	0
21	45	M	-/-	CDmcb-DSS	0	2	2	4	6	11
22	46	M	+/+	CDmcb-DSS	0	1	1	1	1	5
23	14	M	-/-	CD-DSS	0	2	2	3	5	8
24	25	M	+/+	CD-DSS	0	2	3	4	6	8
25	75	M	-/-	CDmcb-DSS	0	1	2	3	2	6
26	83	M	+/+	CDmcb-DSS	0	0	1	0	2	3
27	114	M	+/+	CDmcb-Water	0	0	0	0	0	0
27	115	M	+/+	CDmcb-Water	0	0	0	0	0	0
27	116	M	+/+	CDmcb-Water	0	0	0	0	0	0
27	117	M	-/-	CDmcb-Water	0	0	0	0	0	0
27	118	M	-/-	CDmcb-Water	0	1	0	1	1	0
28	87	M	+/+	CDmcb-DSS	0	2	2	2	2	3
29	121	M	+/+	CDmcb-DSS	0	0	1	2	3	6
30	96	M	+/+	CD-DSS	0	2	4	5	7	11
31	120	M	+/+	CD-Water	0	0	0	0	0	0
31	122	M	+/+	CD-Water	0	0	0	0	0	0
32	88	M	-/-	CD-Water	0	0	0	0	0	0
33	84	M	-/-	CD-Water	0	0	0	0	0	1
34	104	M	-/-	CD-DSS	0	3	3	5	4	6
35	128	M	-/-	CD-DSS	0	3	4	4	6	10
36	91	M	+/+	CD-DSS	0	3	3	6	8	12
36	92	M	+/+	CD-DSS	0	3	7	7	11	11

## Sheet: Necropsy
Cage_ID	Mouse_ID	Sex	Genotype	Group	Spleen	Cecum	Colon	Colon length	Colon length w/o carnoy	SpleenToBW	CecumToBW	ColonToBW	ColonIndex
1	305	M	-/-	CD-Water	0.054	0.166	0.145	7.7	6.6	0.221311	0.680328	0.594262	21.9697
2	315	M	-/-	CD-Water	0.072	0.271	0.133	7.8	7.1	0.27907	1.05039	0.515504	18.7324
3	261	M	+/+	CD-Water	0.098	0.211	0.159	8.4	7.8	0.309148	0.665615	0.501577	20.3846
4	283	M	-/-	CD-DSS	0.099	0.142	0.424	6.7	5.9	0.415966	0.596639	1.78151	71.8644
4	285	M	-/-	CD-DSS	0.091	0.227	0.123	5	4.5	0.387234	0.965957	0.523404	27.3333
4	287	M	+/+	CD-DSS	0.119	0.249	0.135	5.7	4.6	0.419014	0.876761	0.475352	29.3478
5	265	M	-/-	CDmcb-Water	0.101	0.399	0.188	8.9	8.4	0.304217	1.20181	0.566265	22.381
5	267	M	+/+	CDmcb-Water	0.132	0.499	0.18	8.9	8.4	0.402439	1.52134	0.54878	21.4286
5	269	M	+/+	CDmcb-Water	0.12	0.502	0.178	8	7.5	0.346821	1.45087	0.514451	23.7333
6	291	M	+/+	CDmcb-DSS	0.14	0.379	0.18	7.9	7	0.507246	1.37319	0.652174	25.7143
6	293	M	+/+	CDmcb-DSS	0.112	0.318	0.133	6.5	6	0.410256	1.16484	0.487179	22.1667
7	299	M	-/-	CDmcb-DSS	0.075	0.098	0.132	5.4	4.9	0.323276	0.422414	0.568966	26.9388
7	303	M	-/-	CDmcb-DSS	0.126	0.272	0.176	6.9	6.4	0.464945	1.00369	0.649446	27.5
8	335	M	-/-	CDmcb-DSS	0.133	0.273	0.152	5.5	5	0.478417	0.982014	0.546763	30.4
8	337	M	+/+	CDmcb-DSS	0.125	0.458	0.144	8.3	7.8	0.413907	1.51656	0.476821	18.4615
9	359	M	-/-	CDmcb-DSS	0.124	0.153	0.143	4.4	3.9	0.488189	0.602362	0.562992	36.6667
9	361	M	-/-	CDmcb-DSS	0.166	0.254	0.153	5.5	5.1	0.605839	0.927007	0.558394	30
9	363	M	+/+	CDmcb-DSS	0.132	0.251	0.15	5	4.6	0.501901	0.954373	0.570342	32.6087
10	341	M	+/+	CDmcb-Water	0.072	0.345	0.146	9.4	8.9	0.289157	1.38554	0.586345	16.4045
11	343	M	+/+	CDmcb-Water	0.096	0.45	0.122	8.2	7.7	0.356877	1.67286	0.453532	15.8442
11	347	M	-/-	CDmcb-Water	0.1	0.359	0.15	9.9	9.4	0.348432	1.25087	0.522648	15.9574
11	349	M	-/-	CDmcb-Water	0.101	0.464	0.192	9.3	8.8	0.34471	1.58362	0.65529	21.8182
12	345	M	-/-	CD-DSS	0.082	0.27	0.154	6.3	5.8	0.330645	1.08871	0.620968	26.5517
13	367	M	+/+	CD-DSS	0.116	0.378	0.168	4.7	4.2	0.431227	1.4052	0.624535	40
13	369	M	+/+	CD-DSS	0.115	0.16	0.133	4.6	4.1	0.424354	0.590406	0.490775	32.439
13	371	M	+/+	CD-DSS	0.111	0.373	0.148	6	5.4	0.37884	1.27304	0.505119	27.4074
13	373	M	+/+	CD-DSS	0.078	0.174	0.115	5.5	5	0.317073	0.707317	0.46748	23
14	481	M	-/-	CD-DSS	0.102	0.121	0.131	5.1	4.7	0.412955	0.489879	0.530364	27.8723
14	483	M	-/-	CD-DSS	0.168	0.28	0.12	4.4	3.8	0.691358	1.15226	0.493827	31.5789
15	485	M	-/-	CDmcb-DSS	0.082	0.485	0.182	6.8	6.3	0.326693	1.93227	0.7251	28.8889
16	487	M	+/+	CD-Water	0.102	0.187	0.111	7.8	7.3	0.352941	0.647059	0.384083	15.2055
16	491	M	+/+	CD-Water	0.078	0.252	0.118	7.6	7	0.269896	0.871972	0.408304	16.8571
17	493	M	+/+	CDmcb-Water	0.105	0.551	0.146	8.9	8.5	0.333333	1.74921	0.463492	17.1765
17	495	M	-/-	CDmcb-Water	0.102	0.312	0.13	8.1	7.7	0.368231	1.12635	0.469314	16.8831
17	499	M	-/-	CDmcb-Water	0.045	0.244	0.134	7.8	7.3	0.163043	0.884058	0.485507	18.3562
18	503	M	-/-	CD-Water	0.085	0.251	0.12	7.5	7.1	0.342742	1.0121	0.483871	16.9014
19	509	M	-/-	CD-Water	0.1	0.276	0.131	7.4	6.9	0.34965	0.965035	0.458042	18.9855
19	511	M	+/+	CD-Water	0.092	0.321	0.122	7.6	7	0.307692	1.07358	0.408027	17.4286
20	515	M	+/+	CD-Water	0.078	0.292	0.108	7.1	6.7	0.284672	1.06569	0.394161	16.1194
20	519	M	+/+	CD-Water	0.075	0.207	0.116	7.5	6.8	0.309917	0.855372	0.479339	17.0588
20	521	M	-/-	CD-Water	0.079	0.219	0.124	7.6	7	0.294776	0.817164	0.462687	17.7143
21	45	M	-/-	CDmcb-DSS	0.073	0.24	0.151	4.5	4	0.333333	1.09589	0.689498	37.75
22	46	M	+/+	CDmcb-DSS	0.101	0.475	0.159	7.3	6.8	0.404	1.9	0.636	23.3824
23	14	M	-/-	CD-DSS	0.088	0.299	0.155	5.7	5.3	0.32	1.08727	0.563636	29.2453
24	25	M	+/+	CD-DSS	0.063	0.403	0.129	5.9	5.4	0.263598	1.68619	0.539749	23.8889
25	75	M	-/-	CDmcb-DSS	0.082	0.393	0.146	6.1	5.5	0.325397	1.55952	0.579365	26.5455
26	83	M	+/+	CDmcb-DSS	0.095	0.598	0.16	8.1	7.1	0.310458	1.95425	0.522876	22.5352
27	114	M	+/+	CDmcb-Water	0.074	0.325	0.0128	9	8.6	0.302041	1.32653	0.0522449	1.48837
27	115	M	+/+	CDmcb-Water	0.091	0.286	0.132	9.1	8.6	0.358268	1.12598	0.519685	15.3488
27	116	M	+/+	CDmcb-Water	0.072	0.282	0.129	8.9	8.4	0.3	1.175	0.5375	15.3571
27	117	M	-/-	CDmcb-Water	0.074	0.281	0.164	9.4	8.9	0.278195	1.05639	0.616541	18.427
27	118	M	-/-	CDmcb-Water	0.096	0.27	0.177	10.2	9.6	0.34657	0.974729	0.638989	18.4375
28	87	M	+/+	CDmcb-DSS	0.092	0.508	0.164	8.9	8.4	0.311864	1.72203	0.555932	19.5238
29	121	M	+/+	CDmcb-DSS	0.089	0.344	0.148	7.8	7.3	0.339695	1.31298	0.564885	20.274
30	96	M	+/+	CD-DSS	0.092	0.551	0.121	5.5	5	0.389831	2.33475	0.512712	24.2
31	120	M	+/+	CD-Water	0.066	0.23	0.104	7.3	6.8	0.256809	0.894942	0.404669	15.2941
31	122	M	+/+	CD-Water	0.068	0.249	0.126	8.4	7.9	0.275304	1.0081	0.510121	15.9494
32	88	M	-/-	CD-Water	0.062	0.288	0.132	8.1	7.5	0.245059	1.13834	0.521739	17.6
33	84	M	-/-	CD-Water	0.063	0.357	0.116	8.2	7.7	0.254032	1.43952	0.467742	15.0649
34	104	M	-/-	CD-DSS	0.087	0.244	0.153	5.3	4.8	0.381579	1.07018	0.671053	31.875
35	128	M	-/-	CD-DSS	0.072	0.243	0.133	5.7	5.2	0.302521	1.02101	0.558824	25.5769
36	91	M	+/+	CD-DSS	0.194	0.766	0.145	5.6	5.1	0.82906	3.2735	0.619658	28.4314
36	92	M	+/+	CD-DSS	0.159	0.589	0.144	5.3	4.9	0.654321	2.42387	0.592593	29.3878

## Sheet: Histology
Comments	Cage_ID	Mouse_ID	Sex	Genotype	Birthweek	Group	Inflammation	Extent	Crypt damage	Area	Score
MCB14a	1	305	M	-/-	16-24	CD-Water	1	1	0	1	2
MCB14a	2	315	M	-/-	16+17-24	CD-Water	1	1	0	1	2
MCB14a	3	261	M	+/+	08-24	CD-Water	1	1	0	1	2
MCB14a	4	283	M	-/-	14-24	CD-DSS	3	3	4	4	40
MCB14a	4	285	M	-/-	14-24	CD-DSS	3	3	4	3	30
MCB14a	4	287	M	+/+	14-24	CD-DSS	3	2	4	4	36
MCB14a	5	265	M	-/-	09-24	CDmcb-Water	0	0	0	1	0
MCB14a	5	267	M	+/+	09-24	CDmcb-Water	1	1	0	1	2
MCB14a	5	269	M	+/+	09-24	CDmcb-Water	0	0	0	1	0
MCB14a	6	291	M	+/+	14-24	CDmcb-DSS	2	2	2	3	18
MCB14a	6	293	M	+/+	14-24	CDmcb-DSS	2	2	3	3	21
MCB14a	7	299	M	-/-	15-24	CDmcb-DSS	3	3	4	4	40
MCB14a	7	303	M	-/-	15-24	CDmcb-DSS	3	2	3	4	32
MCB14b	8	335	M	-/-	22-24	CDmcb-DSS	3	3	4	4	40
MCB14b	8	337	M	+/+	22-24	CDmcb-DSS	3	2	2	4	28
MCB14b	9	359	M	-/-	23-24	CDmcb-DSS	3	3	4	4	40
MCB14b	9	361	M	-/-	23-24	CDmcb-DSS	3	3	4	4	40
MCB14b	9	363	M	+/+	23-24	CDmcb-DSS	3	2	4	4	36
MCB14b	10	341	M	+/+	23-24	CDmcb-Water	0	0	0	1	0
MCB14b	11	343	M	+/+	23-24	CDmcb-Water	1	1	0	1	2
MCB14b	11	347	M	-/-	23-24	CDmcb-Water	0	0	0	1	0
MCB14b	11	349	M	-/-	23-24	CDmcb-Water	0	0	0	1	0
MCB14b	12	345	M	-/-	23-24	CD-DSS	2	2	2	4	24
MCB14b	13	367	M	+/+	24-24	CD-DSS	3	3	4	4	40
MCB14b	13	369	M	+/+	24-24	CD-DSS	3	3	3	4	36
MCB14b	13	371	M	+/+	24-24	CD-DSS	3	3	2	4	32
MCB14b	13	373	M	+/+	24-24	CD-DSS	3	3	4	4	40
MCB14c	14	481	M	-/-	40-24	CD-DSS	3	3	3	4	36
MCB14c	14	483	M	-/-	40-24	CD-DSS	3	2	3	4	32
MCB14c	15	485	M	-/-	41-24	CDmcb-DSS	3	2	3	4	32
MCB14c	16	487	M	+/+	41-24	CD-Water	1	0	0	1	1
MCB14c	16	491	M	+/+	41-24	CD-Water	1	1	0	1	2
MCB14c	17	493	M	+/+	41-24	CDmcb-Water	0	0	0	1	0
MCB14c	17	495	M	-/-	41-24	CDmcb-Water	0	0	0	1	0
MCB14c	17	499	M	-/-	41-24	CDmcb-Water	1	1	0	1	2
MCB14c	18	503	M	-/-	41-24	CD-Water	1	1	0	1	2
MCB14c	19	509	M	-/-	41-24	CD-Water	0	0	0	1	0
MCB14c	19	511	M	+/+	41-24	CD-Water	0	0	0	1	0
MCB14c	20	515	M	+/+	42-24	CD-Water	1	0	0	1	1
MCB14c	20	519	M	+/+	42-24	CD-Water	1	1	0	1	2
MCB14c	20	521	M	-/-	42-24	CD-Water	0	0	0	1	0
MCB14d	21	45	M	-/-		CDmcb-DSS	3	3	4	4	40
MCB14d	22	46	M	+/+		CDmcb-DSS	2	2	2	3	18
MCB14d	23	14	M	-/-		CD-DSS	3	2	3	4	32
MCB14d	24	25	M	+/+		CD-DSS	3	2	3	4	32

## Sheet: DAS calculation
					D0						D1						D2						D3						D4						D5
Cage_ID	Mouse_ID	Sex	Genotype	Group	%BW loss	Stool consistency	Blood	BW score	Stool Score	Total	%BW loss	Stool consistency	Blood	BW score	Stool Score	Total	%BW loss	Stool consistency	Blood	BW score	Stool Score	Total	%BW loss	Stool consistency	Blood	BW score	Stool Score	Total	%BW loss	Stool consistency	Blood	BW score	Stool Score	Total	%BW loss	Stool consistency	Blood	BW score	Stool Score	Total
1	305	M	-/-	CD-Water	0	N	0	0	0	0	-0.420168	N	0	0	0	0	1.2605	N	0	0	0	0	0	N	0	0	0	0	1.68067	N	0	0	0	0	2.52101	N	0	0	0	0
2	315	M	-/-	CD-Water	0	N	0	0	0	0	3.61446	M	0	0	1	1	2.81124	N	0	0	0	0	1.60643	N	0	0	0	0	2.81124	N	0	0	0	0	3.61446	N	0	0	0	0
3	261	M	+/+	CD-Water	0	N	0	0	0	0	-0.318471	N	0	0	0	0	-0.318471	N	0	0	0	0	1.91083	N	0	0	0	0	-0.318471	N	0	0	0	0	0.955414	N	0	0	0	0
4	283	M	-/-	CD-DSS	0	N	0	0	0	0	-2.04778	D	0	1	4	5	-5.11945	L	0	2	2	4	-5.11945			2	0	2	-18.7713	D	4	4	4	12	0			0	0	12
4	285	M	-/-	CD-DSS	0	N	0	0	0	0	-1.8315	L	0	1	2	3	-5.12821	L	0	2	2	4	-2.5641	L	1	1	2	4	-3.663	L	1	1	2	4	-13.9194	D	4	3	4	11
4	287	M	+/+	CD-DSS	0	M	0	0	1	1	-1.25786	D	0	1	4	5	-1.88679	L	0	1	2	3	-2.83019	L	0	1	2	3	-5.03145	L	1	2	2	5	-10.6918	D	4	3	4	11
5	265	M	-/-	CDmcb-Water	0	N	0	0	0	0	-0.593472	N	0	0	0	0	-0.296736	N	0	0	0	0	-1.48368	N	0	1	0	1	-1.18694	N	0	1	0	1	-1.48368	N	0	1	0	1
5	267	M	+/+	CDmcb-Water	0	N	0	0	0	0	-0.606061	N	0	0	0	0	0.909091	N	0	0	0	0	-0.30303	N	0	0	0	0	-1.51515	N	0	1	0	1	-0.606061	N	1	0	0	1
5	269	M	+/+	CDmcb-Water	0	N	0	0	0	0	0.578035	N	0	0	0	0	0	N	0	0	0	0	0.578035	N	0	0	0	0	-0.867052	N	0	0	0	0	0	N	0	0	0	0
6	291	M	+/+	CDmcb-DSS	0	M	0	0	1	1	-0.352113	L	0	0	2	2	0.704225	L	0	0	2	2	1.40845	L	1	0	2	3	-1.05634	L	0	1	2	3	-2.8169	L	1	1	2	4
6	293	M	+/+	CDmcb-DSS	0	N	0	0	0	0	0	L	0	0	2	2	0	L	0	0	2	2	1.3468	L	1	0	2	3	-2.0202	L	2	1	2	5	-8.08081	L	2	2	2	6
7	299	M	-/-	CDmcb-DSS	0	N	0	0	0	0	-2.10526	M	0	1	1	2	-2.10526	L	0	1	2	3	-1.40351	L	1	1	2	4	-10.1754	L	2	3	2	7	-18.5965	D	1	4	4	9
7	303	M	-/-	CDmcb-DSS	0	N	0	0	0	0	-0.369004	M	0	0	1	1	0.738007	M	0	0	1	1	2.58303	L	1	0	2	3	5.90406	L	2	0	2	4	0	L	2	0	2	4
8	335	M	-/-	CDmcb-DSS	0	N	0	0	0	0	-0.651466	L	0	0	2	2	0.977199	M	0	0	1	1	0	L	1	0	2	3	-4.23453	L	2	2	2	6	-9.44625	D	3	2	4	9
8	337	M	+/+	CDmcb-DSS	0	N	0	0	0	0	1.2945	N	0	0	0	0	1.61812	M	0	0	1	1	0.647249	L	0	0	2	2	-0.647249	L	2	0	2	4	-2.26537	D	2	1	4	7
9	359	M	-/-	CDmcb-DSS	0	N	0	0	0	0	1.74216	L	1	0	2	3	1.0453	M	0	0	1	1	1.39373	L	0	0	2	2	1.0453	L	2	0	2	4	-11.4983	D	3	3	4	10
9	361	M	-/-	CDmcb-DSS	0	N	0	0	0	0	2.22222	M	1	0	1	2	0.31746	L	0	0	2	2	-2.53968	L	0	1	2	3	-4.12698	L	2	2	2	6	-13.0159	L	3	3	2	8
9	363	M	+/+	CDmcb-DSS	0	N	0	0	0	0	0.890208	M	0	0	1	1	0.296736	L	0	0	2	2	-2.67062	M	1	1	1	3	-10.3858	D	3	3	4	10	-21.9585	D	4	4	4	12
10	341	M	+/+	CDmcb-Water	0	N	0	0	0	0	0	N	0	0	0	0	-1.96078	N	0	1	0	1	-2.35294	N	0	1	0	1	-2.7451	N	0	1	0	1	-2.35294	N	0	1	0	1
11	343	M	+/+	CDmcb-Water	0	N	0	0	0	0	2.91971	N	0	0	0	0	2.91971	N	0	0	0	0	1.09489	N	0	0	0	0	1.09489	N	0	0	0	0	-1.82482	N	0	1	0	1
11	347	M	-/-	CDmcb-Water	0	N	0	0	0	0	-1.69492	N	0	1	0	1	-2.37288	N	0	1	0	1	-2.37288	N	0	1	0	1	-3.05085	N	0	1	0	1	-2.71186	N	0	1	0	1
11	349	M	-/-	CDmcb-Water	0	N	0	0	0	0	1.03448	N	0	0	0	0	2.41379	N	0	0	0	0	0	N	0	0	0	0	1.03448	N	0	0	0	0	1.03448	N	0	0	0	0
12	345	M	-/-	CD-DSS	0	N	0	0	0	0	0.393701	L	0	0	2	2	1.9685	M	0	0	1	1	-0.393701	M	2	0	1	3	-1.1811	L	2	1	2	5	-2.3622	D	3	1	4	8
13	367	M	+/+	CD-DSS	0	N	0	0	0	0	-1.63934	L	0	1	2	3	-0.655738	M	0	0	1	1	-1.31148	L	1	1	2	4	-2.95082	L	2	1	2	5	-11.8033	D	4	3	4	11
13	369	M	+/+	CD-DSS	0	N	0	0	0	0	-2.72109	M	0	1	1	2	-0.340136	M	0	0	1	1	1.70068	L	2	0	2	4	-1.70068	D	3	1	4	8	-7.82313	D	4	2	4	10
13	371	M	+/+	CD-DSS	0	N	0	0	0	0	0	M	0	0	1	1	1.63934	L	1	0	2	3	0.983607	L	1	0	2	3	-0.655738	L	2	0	2	4	-3.93443	L	3	1	2	6
13	373	M	+/+	CD-DSS	0	N	0	0	0	0	-0.77821	M	0	0	1	1	1.16732	L	1	0	2	3	3.11284	M	2	0	1	3	0.389105	L	2	0	2	4	-4.28016	D	4	2	4	10
14	481	M	-/-	CD-DSS	0	M	0	0	1	1	-1.01351	L	0	1	2	3	-2.36486	L	0	1	2	3	-3.04054	L	1	1	2	4	-9.45946	D	3	2	4	9	-16.5541	D	3	4	4	11
14	483	M	-/-	CD-DSS	0	N	0	0	0	0	-2.31788	L	0	1	2	3	-3.64238	L	2	1	2	5	-19.5364	D	4	4	4	12	-19.5364			4	0	12	-19.5364			4	0	12
15	485	M	-/-	CDmcb-DSS	0	N	0	0	0	0	-1.17188	L	0	1	2	3	-1.95312	L	0	1	2	3	-4.6875	L	1	2	2	5	-3.51563	L	1	1	2	4	-1.95312	L	2	1	2	5
16	487	M	+/+	CD-Water	0	N	0	0	0	0	-2.07612	N	0	1	0	1	-2.42215	N	0	1	0	1	-3.11419	N	0	1	0	1	-1.38408	N	0	1	0	1	0	N	0	0	0	0
16	491	M	+/+	CD-Water	0	N	0	0	0	0	-2.06897	N	0	1	0	1	0	N	0	0	0	0	-1.37931	N	0	1	0	1	-1.03448	N	0	1	0	1	-0.344828	N	0	0	0	0
17	493	M	+/+	CDmcb-Water	0	M	0	0	1	1	0.321543	N	0	0	0	0	-0.321543	N	0	0	0	0	0	N	0	0	0	0	-0.96463	N	0	0	0	0	1.28617	N	0	0	0	0
17	495	M	-/-	CDmcb-Water	0	N	0	0	0	0	0	L	0	0	2	2	-1.0453	L	0	1	2	3	-2.09059	N	0	1	0	1	-2.43902	N	0	1	0	1	-3.48432	N	0	1	0	1
17	499	M	-/-	CDmcb-Water	0	N	0	0	0	0	1.0989	N	0	0	0	0	0.732601	N	0	0	0	0	0.3663	N	0	0	0	0	1.8315	N	0	0	0	0	1.0989	N	0	0	0	0
18	503	M	-/-	CD-Water	0	N	0	0	0	0	-2.29008	N	0	1	0	1	-3.81679	N	0	1	0	1	-5.72519	N	0	2	0	2	-5.72519	N	0	2	0	2	-5.34351	N	0	2	0	2
19	509	M	-/-	CD-Water	0	N	0	0	0	0	-1.47059	M	0	1	1	2	0	M	0	0	1	1	4.04412	M	0	0	1	1	4.77941	N	0	0	0	0	5.14706	N	0	0	0	0
19	511	M	+/+	CD-Water	0	N	0	0	0	0	-2.32558	M	0	1	1	2	-3.98671	M	0	1	1	2	-1.99336	N	0	1	0	1	-0.996678	N	0	0	0	0	-0.664452	N	0	0	0	0
20	515	M	+/+	CD-Water	0	N	0	0	0	0	-1.45985	N	0	1	0	1	-2.18978	N	0	1	0	1	-1.82482	N	0	1	0	1	-0.729927	N	0	0	0	0	0	N	0	0	0	0
20	519	M	+/+	CD-Water	0	N	0	0	0	0	-3.65854	N	0	1	0	1	-1.62602	N	0	1	0	1	-0.813008	N	0	0	0	0	-2.03252	N	0	1	0	1	-1.62602	N	0	1	0	1
20	521	M	-/-	CD-Water	0	M	0	0	1	1	-0.381679	N	0	0	0	0	-0.763359	N	0	0	0	0	0.381679	N	0	0	0	0	2.29008	N	0	0	0	0	2.29008	N	0	0	0	0
21	45	M	-/-	CDmcb-DSS	0	N	0	0	0	0	-2.3166	M	0	1	1	2	-3.0888	M	0	1	1	2	-4.2471	L	0	2	2	4	-9.65251	L	2	2	2	6	-15.444	D	3	4	4	11
22	46	M	+/+	CDmcb-DSS	0	N	0	0	0	0	2.43902	M	0	0	1	1	0	M	0	0	1	1	0.406504	M	0	0	1	1	0.813008	M	0	0	1	1	1.62602	D	1	0	4	5
23	14	M	-/-	CD-DSS	0	N	0	0	0	0	2.8169	L	0	0	2	2	2.11268	L	0	0	2	2	2.46479	L	1	0	2	3	3.87324	L	3	0	2	5	-3.16901	D	3	1	4	8
24	25	M	+/+	CD-DSS	0	N	0	0	0	0	-0.389105	L	0	0	2	2	-2.72374	L	0	1	2	3	-2.72374	L	1	1	2	4	-4.28016	L	2	2	2	6	-7.00389	D	2	2	4	8
25	75	M	-/-	CDmcb-DSS	0	N	0	0	0	0	1.44404	M	0	0	1	1	-0.722022	M	1	0	1	2	-1.08303	M	1	1	1	3	-3.2491	M	0	1	1	2	-9.02527	L	2	2	2	6
26	83	M	+/+	CDmcb-DSS	0	N	0	0	0	0	1.92308	N	0	0	0	0	-0.320513	M	0	0	1	1	-0.320513	N	0	0	0	0	-2.24359	M	0	1	1	2	-1.92308	M	1	1	1	3
27	114	M	+/+	CDmcb-Water	0	N	0	0	0	0	0.83682	N	0	0	0	0	2.09205	N	0	0	0	0	1.67364	N	0	0	0	0	0.83682	N	0	0	0	0	2.51046	N	0	0	0	0
27	115	M	+/+	CDmcb-Water	0	N	0	0	0	0	2.41935	N	0	0	0	0	1.6129	N	0	0	0	0	2.41935	N	0	0	0	0	2.01613	N	0	0	0	0	2.41935	N	0	0	0	0
27	116	M	+/+	CDmcb-Water	0	N	0	0	0	0	2.62009	N	0	0	0	0	3.05677	N	0	0	0	0	4.80349	N	0	0	0	0	1.74672	N	0	0	0	0	4.80349	N	0	0	0	0
27	117	M	-/-	CDmcb-Water	0	N	0	0	0	0	0.398406	N	0	0	0	0	3.58566	N	0	0	0	0	5.9761	N	0	0	0	0	6.77291	N	0	0	0	0	5.9761	N	0	0	0	0
27	118	M	-/-	CDmcb-Water	0	N	0	0	0	0	-1.0989	N	0	1	0	1	-0.732601	N	0	0	0	0	-1.0989	N	0	1	0	1	-1.0989	N	0	1	0	1	1.4652	N	0	0	0	0
28	87	M	+/+	CDmcb-DSS	0	N	0	0	0	0	-1.98675	M	0	1	1	2	-1.3245	M	0	1	1	2	-2.31788	M	0	1	1	2	-1.3245	M	0	1	1	2	-2.31788	M	1	1	1	3
29	121	M	+/+	CDmcb-DSS	0	N	0	0	0	0	0.373134	N	0	0	0	0	-0.746269	M	0	0	1	1	0	M	1	0	1	2	-1.86567	M	1	1	1	3	-2.23881	L	3	1	2	6
30	96	M	+/+	CD-DSS	0	N	0	0	0	0	0	L	0	0	2	2	-1.49254	L	1	1	2	4	-3.73134	L	2	1	2	5	-7.08955	L	3	2	2	7	-11.9403	D	4	3	4	11
31	120	M	+/+	CD-Water	0	N	0	0	0	0	6.80851	N	0	0	0	0	5.10638	N	0	0	0	0	8.08511	N	0	0	0	0	8.51064	N	0	0	0	0	9.3617	N	0	0	0	0
31	122	M	+/+	CD-Water	0	N	0	0	0	0	-0.421941	N	0	0	0	0	1.26582	N	0	0	0	0	3.37553	N	0	0	0	0	4.64135	N	0	0	0	0	4.21941	N	0	0	0	0
32	88	M	-/-	CD-Water	0	N	0	0	0	0	1.25523	N	0	0	0	0	3.34728	N	0	0	0	0	7.11297	N	0	0	0	0	4.1841	N	0	0	0	0	5.85774	N	0	0	0	0
33	84	M	-/-	CD-Water	0	N	0	0	0	0	-0.833333	N	0	0	0	0	0.416667	N	0	0	0	0	1.66667	N	0	0	0	0	1.66667	N	0	0	0	0	3.33333	M	0	0	1	1
34	104	M	-/-	CD-DSS	0	N	0	0	0	0	2.97872	L	1	0	2	3	0	L	1	0	2	3	-2.12766	L	2	1	2	5	-0.851064	L	2	0	2	4	-2.97872	L	3	1	2	6
35	128	M	-/-	CD-DSS	0	N	0	0	0	0	1.55642	L	1	0	2	3	1.55642	L	2	0	2	4	0	L	2	0	2	4	-1.16732	L	3	1	2	6	-7.393	D	4	2	4	10
36	91	M	+/+	CD-DSS	0	N	0	0	0	0	-1.0101	L	0	1	2	3	-0.673401	L	1	0	2	3	-4.7138	L	2	2	2	6	-12.4579	L	3	3	2	8	-21.2121	D	4	4	4	12
36	92	M	+/+	CD-DSS	0	N	0	0	0	0	-3.19149	L	0	1	2	3	-2.48227	D	2	1	4	7	-3.5461	L	4	1	2	7	-13.8298	D	4	3	4	11	-13.8298	D	4	3	4	11
