# Supplementary material for: Microbial Activation of the GLP-2R Mitigates Gastrointestinal Inflammation
Source: Research Square preprint supplement (doi:10.21203/rs.3.rs-6973437/v1), 2025-07-09
Supplement: Supplementary file 7 [file 921dffbb5e2dd77785075e1a.xlsx]

## Sheet: README
THIS SHEET CONTAIN METADATA FROM MICE USED IN FIGURE 4 REGARDING GLP2R WT AND KO MICE CHALLENGED WITH 5FU
DPI = DAYS POST INJECTION

## Sheet: Body parameters (R)
	Cage_ID	Mouse_ID	Sex	Genotype	Group	DPI-7	DPI-1	DPI01	DPI02	DPI03	DPI04
	1	GLKA572	F	+/+	CD-Saline	23.4	22.7	21.7	21.8	22.3	22.3
	1	GLKA556	F	-/-	CD-Saline	29.3	30	31.5	31	30.9	29.8
	1	GLKA594	F	-/-	CD-Saline	23.6	22.8	23.8	22.7	23.1	22.8
	2	GLKA586	F	+/+	CDmcb-Saline	27.8	25.4	25.6	25	25.2	25.5
	2	GLKA608	F	-/-	CDmcb-Saline	19.9	20.1	20.3	20.6	20.8	20.9
	2	GLKA620	F	-/-	CDmcb-Saline	22	20.7	21.2	21.4	21	21.3
	2	GLKA558	F	+/+	CDmcb-Saline	23.1	22.1	21.8	22.2	22.6	22.6
	2	GLKA560	F	-/-	CDmcb-Saline	24.3	24	23.8	24	24.3	24.3
	3	GLKA550	F	+/+	CD-5FU	24.2	23.3	22.6	22.7	22.5	22.1
	3	GLKA528	F	-/-	CD-5FU	25.1	23.4	22.2	22	21.8	20.5
	3	GLKA610	F	-/-	CD-5FU	20.4	19.8	19.6	19.2	19.2	18.9
	3	GLKA562	F	+/+	CD-5FU	20.6	20.4	19.8	19.6	18.5	17.8
	3	GLKA568	F	-/-	CD-5FU	22.1	20.7	19.6	19.4	18.6	17.9
	4	GLKA570	F	-/-	CDmcb-5FU	26.6	24.9	24.3	23.4	23	23.4
	4	GLKA542	F	-/-	CDmcb-5FU	23.4	23.2	22.4	21.3	21.3	21.3
	4	GLKA612	F	-/-	CDmcb-5FU	21.8	22	21.3	20.6	20.2	20.7
	4	GLKA554	F	+/+	CDmcb-5FU	24.3	24	23	22.3	21.7	21.8
	4	GLKA548	F	+/+	CDmcb-5FU	25	25.5	25.2	24.8	24.2	24
	5	618	F	+/+	CD-Saline	23.1	23	23.9	24.4	24.7	25
	5	628	F	-/-	CD-Saline	24.2	23.5	25.5	25.5	25.2	28.3
	5	632	F	+/+	CD-Saline	24.9	25.1	27.3	27	27	26.8
	5	640	F	-/-	CD-Saline	22.5	22.2	23.5	23.6	23.9	23.2
	6	642	F	-/-	CD-5FU	25.1	24.2	24.3	24.8	23.5	23.1
	6	648	F	+/+	CD-5FU	21.9	21.8	21.3	20.9	20.1	20.7
	6	654	F	-/-	CD-5FU	23.8	21.9	22.1	21.8	20.6	20.3
	6	656	F	+/+	CD-5FU	22	21.4	21	21	20.5	20.8
	7	668	F	+/+	CD-5FU	20.5	19.6	19.7	20	19.3	19
	7	670	F	-/-	CD-5FU	20.9	21.3	22	22	21.3	21.3
	8	662	F	+/+	CDmcb-5FU	20	19.8	19.2	18.5	18.1	19.3
	8	664	F	+/+	CDmcb-5FU	22.5	22.1	21.8	21.2	20.6	21.3
	8	666	F	-/-	CDmcb-5FU	21	20.6	20.2	19	19.1	19.7
	9	676	F	+/+	CDmcb-5FU	22.1	21.8	21.3	20.6	20.7	21
	9	678	F	-/-	CDmcb-5FU	20.4	20.4	20.3	19.8	19	19
	9	682	F	-/-	CDmcb-5FU	13.6	14.6	14.9	14.6	13.6	12.9
	9	684	F	+/+	CDmcb-5FU	16	17	15.8	16.1	16.1	16.8
	10	686	F	+/+	CDmcb-Saline	15.5	16.6	16.4	16.7	16.8	17.2
	10	688	F	-/-	CDmcb-Saline	17	18.7	18.8	18.6	19.1	19.2
	10	694	F	-/-	CDmcb-Saline	16.6	17.6	17.3	18	18.3	18.1
	11	696	F	-/-	CDmcb-Saline	16.3	16.7	17.3	17.1	17.2	17.7
	11	702	F	+/+	CDmcb-Saline	16.7	17.5	17.2	17.2	17.6	17.8
	11	706	F	+/+	CDmcb-Saline	18	18.4	18.9	18.6	18.4	18.8
	12	714	F	-/-	CD-Saline	16	16.5	16.4	16.2	17.5	17.3
	12	716	F	+/+	CD-Saline	16.4	16.5	16.2	16.1	17.2	17.5
	13	734	F	-/-	CD-Saline	21.7	22.2	23.8	23.8	23.5	23.1
	13	772	F	+/+	CD-Saline	18.1	19.6	20.2	20.2	20	20.3
	14	756	F	-/-	CD-5FU	20.2	20.6	20.4	19.6	18.8	18.3
	14	762	F	+/+	CD-5FU	20	20.4	20.5	20	19.3	19.2
	14	766	F	-/-	CD-5FU	19.5	20.3	19.3	18.5	17.7	18.9
	14	750	F	+/+	CD-5FU	23	24.5	23.8	23.2	21.7	22.4
	14	776	F	+/+	CD-5FU	20	19.3	19.9	19.9	18.9	18.9
	15	730	F	+/+	CDmcb-Saline	19.5	20.4	21	20.9	20.9	20.8
	15	732	F	-/-	CDmcb-Saline	20.6	21.3	21.7	21.6	21.6	21.5
	15	722	F	+/+	CDmcb-Saline	24	24.4	24.3	24.6	24.3	24.7
	16	736	F	-/-	CDmcb-5FU	21.2	22.5	21.1	19.9	19	19.1
	16	768	F	+/+	CDmcb-5FU	20.9	21	20.3	19.5	19.6	19.9
	16	752	F	+/+	CDmcb-5FU	24	24.4	23.9	23	21.8	22.4
	16	780	F	-/-	CDmcb-5FU	17.8	19.1	19.1	17.9	16.9	16.8
	16	784	F	+/+	CDmcb-5FU	17.4	19.3	18.5	17.2	16.6	16.4
	17	774	F	+/+	CD-Saline	17.5	18.1	18.2	19.3	20.5	19.9
	18	786	F	+/+	CDmcb-5FU	25.6	25.7	24.1	23.2	22.5	22.6
	18	790	F	-/-	CDmcb-5FU	29.7	30.5	29	27.9	25.9	25
	19	794	F	-/-	CDmcb-Saline	24.3	23.2	23.2	23	22.8	23.3
	19	796	F	+/+	CDmcb-Saline	25.3	24.4	24	23.3	23.6	23.4
	19	808	F	-/-	CDmcb-Saline	23.2	23.7	23.3	23.3	23.5	23
	19	812	F	-/-	CDmcb-Saline	22.5	22	22.2	21.8	21.9	22.1
	20	802	F	-/-	CD-5FU	23.5	22.2	21.4	21.6	20.6	20.8
	20	806	F	-/-	CD-5FU	24.7	22.6	22.3	22.5	21.8	21.1
	20	824	F	+/+	CD-5FU	24.6	24.6	23.7	23.3	21.9	21.7
	21	814	F	-/-	CD-Saline	22.3	21.5	21.5	21.2	21.6	22.1
	21	816	F	+/+	CD-Saline	23.2	22.5	22.2	21.8	22.1	22.7
	21	818	F	-/-	CD-Saline	24.9	24.3	24.7	24.6	24.9	24.5
	21	820	F	-/-	CD-Saline	25.4	23.7	23.9	23.3	23.1	24.1

## Sheet: Weight gain (R)
	Cage_ID	Mouse_ID	Sex	Genotype	Group	DPI0	DPI01	DPI02	DPI03	DPI04
	1	GLKA572	F	+/+	CD-Saline	0	-1	-0.9	-0.4	-0.4
	1	GLKA556	F	-/-	CD-Saline	0	1.5	1	0.9	-0.2
	1	GLKA594	F	-/-	CD-Saline	0	1	-0.1	0.3	0
	2	GLKA586	F	+/+	CDmcb-Saline	0	0.2	-0.4	-0.2	0.1
	2	GLKA608	F	-/-	CDmcb-Saline	0	0.2	0.5	0.7	0.8
	2	GLKA620	F	-/-	CDmcb-Saline	0	0.5	0.7	0.3	0.6
	2	GLKA558	F	+/+	CDmcb-Saline	0	-0.3	0.1	0.5	0.5
	2	GLKA560	F	-/-	CDmcb-Saline	0	-0.2	0	0.3	0.3
	3	GLKA550	F	+/+	CD-5FU	0	-0.7	-0.6	-0.8	-1.2
	3	GLKA528	F	-/-	CD-5FU	0	-1.2	-1.4	-1.6	-2.9
	3	GLKA610	F	-/-	CD-5FU	0	-0.2	-0.6	-0.6	-0.9
	3	GLKA562	F	+/+	CD-5FU	0	-0.6	-0.8	-1.9	-2.6
	3	GLKA568	F	-/-	CD-5FU	0	-1.1	-1.3	-2.1	-2.8
	4	GLKA570	F	-/-	CDmcb-5FU	0	-0.6	-1.5	-1.9	-1.5
	4	GLKA542	F	-/-	CDmcb-5FU	0	-0.8	-1.9	-1.9	-1.9
	4	GLKA612	F	-/-	CDmcb-5FU	0	-0.7	-1.4	-1.8	-1.3
	4	GLKA554	F	+/+	CDmcb-5FU	0	-1	-1.7	-2.3	-2.2
	4	GLKA548	F	+/+	CDmcb-5FU	0	-0.3	-0.7	-1.3	-1.5
	5	618	F	+/+	CD-Saline	0	0.9	1.4	1.7	2
	5	628	F	-/-	CD-Saline	0	2	2	1.7	4.8
	5	632	F	+/+	CD-Saline	0	2.2	1.9	1.9	1.7
	5	640	F	-/-	CD-Saline	0	1.3	1.4	1.7	1
	6	642	F	-/-	CD-5FU	0	0.1	0.6	-0.7	-1.1
	6	648	F	+/+	CD-5FU	0	-0.5	-0.9	-1.7	-1.1
	6	654	F	-/-	CD-5FU	0	0.2	-0.1	-1.3	-1.6
	6	656	F	+/+	CD-5FU	0	-0.4	-0.4	-0.9	-0.6
	7	668	F	+/+	CD-5FU	0	0.1	0.4	-0.3	-0.6
	7	670	F	-/-	CD-5FU	0	0.7	0.7	0	0
	8	662	F	+/+	CDmcb-5FU	0	-0.6	-1.3	-1.7	-0.5
	8	664	F	+/+	CDmcb-5FU	0	-0.3	-0.9	-1.5	-0.8
	8	666	F	-/-	CDmcb-5FU	0	-0.4	-1.6	-1.5	-0.9
	9	676	F	+/+	CDmcb-5FU	0	-0.5	-1.2	-1.1	-0.8
	9	678	F	-/-	CDmcb-5FU	0	-0.1	-0.6	-1.4	-1.4
	9	682	F	-/-	CDmcb-5FU	0	0.3	0	-1	-1.7
	9	684	F	+/+	CDmcb-5FU	0	-1.2	-0.9	-0.9	-0.2
	10	686	F	+/+	CDmcb-Saline	0	-0.2	0.1	0.2	0.6
	10	688	F	-/-	CDmcb-Saline	0	0.1	-0.1	0.4	0.5
	10	694	F	-/-	CDmcb-Saline	0	-0.3	0.4	0.7	0.5
	11	696	F	-/-	CDmcb-Saline	0	0.6	0.4	0.5	1
	11	702	F	+/+	CDmcb-Saline	0	-0.3	-0.3	0.1	0.3
	11	706	F	+/+	CDmcb-Saline	0	0.5	0.2	0	0.4
	12	714	F	-/-	CD-Saline	0	-0.1	-0.3	1	0.8
	12	716	F	+/+	CD-Saline	0	-0.3	-0.4	0.7	1
	13	734	F	-/-	CD-Saline	0	1.6	1.6	1.3	0.9
	13	772	F	+/+	CD-Saline	0	0.6	0.6	0.4	0.7
	14	756	F	-/-	CD-5FU	0	-0.2	-1	-1.8	-2.3
	14	762	F	+/+	CD-5FU	0	0.1	-0.4	-1.1	-1.2
	14	766	F	-/-	CD-5FU	0	-1	-1.8	-2.6	-1.4
	14	750	F	+/+	CD-5FU	0	-0.7	-1.3	-2.8	-2.1
	14	776	F	+/+	CD-5FU	0	0.6	0.6	-0.4	-0.4
	15	730	F	+/+	CDmcb-Saline	0	0.6	0.5	0.5	0.4
	15	732	F	-/-	CDmcb-Saline	0	0.4	0.3	0.3	0.2
	15	722	F	+/+	CDmcb-Saline	0	-0.1	0.2	-0.1	0.3
	16	736	F	-/-	CDmcb-5FU	0	-1.4	-2.6	-3.5	-3.4
	16	768	F	+/+	CDmcb-5FU	0	-0.7	-1.5	-1.4	-1.1
	16	752	F	+/+	CDmcb-5FU	0	-0.5	-1.4	-2.6	-2
	16	780	F	-/-	CDmcb-5FU	0	0	-1.2	-2.2	-2.3
	16	784	F	+/+	CDmcb-5FU	0	-0.8	-2.1	-2.7	-2.9
	17	774	F	+/+	CD-Saline	0	0.1	1.2	2.4	1.8
	18	786	F	+/+	CDmcb-5FU	0	-1.6	-2.5	-3.2	-3.1
	18	790	F	-/-	CDmcb-5FU	0	-1.5	-2.6	-4.6	-5.5
	19	794	F	-/-	CDmcb-Saline	0	0	-0.2	-0.4	0.1
	19	796	F	+/+	CDmcb-Saline	0	-0.4	-1.1	-0.8	-1
	19	808	F	-/-	CDmcb-Saline	0	-0.4	-0.4	-0.2	-0.7
	19	812	F	-/-	CDmcb-Saline	0	0.2	-0.2	-0.1	0.1
	20	802	F	-/-	CD-5FU	0	-0.8	-0.6	-1.6	-1.4
	20	806	F	-/-	CD-5FU	0	-0.3	-0.1	-0.8	-1.5
	20	824	F	+/+	CD-5FU	0	-0.9	-1.3	-2.7	-2.9
	21	814	F	-/-	CD-Saline	0	0	-0.3	0.1	0.6
	21	816	F	+/+	CD-Saline	0	-0.3	-0.7	-0.4	0.2
	21	818	F	-/-	CD-Saline	0	0.4	0.3	0.6	0.2
	21	820	F	-/-	CD-Saline	0	0.2	-0.4	-0.6	0.4

## Sheet: WeightPct (R)
	Cage_ID	Mouse_ID	Sex	Genotype	Group	DPI0	DPI01	DPI02	DPI03	DPI04
	1	GLKA572	F	+/+	CD-Saline	0	-4.40529	-3.96476	-1.76211	-1.76211
	1	GLKA556	F	-/-	CD-Saline	0	5	3.33333	3	-0.666667
	1	GLKA594	F	-/-	CD-Saline	0	4.38596	-0.438596	1.31579	0
	2	GLKA586	F	+/+	CDmcb-Saline	0	0.787402	-1.5748	-0.787402	0.393701
	2	GLKA608	F	-/-	CDmcb-Saline	0	0.995025	2.48756	3.48259	3.9801
	2	GLKA620	F	-/-	CDmcb-Saline	0	2.41546	3.38164	1.44928	2.89855
	2	GLKA558	F	+/+	CDmcb-Saline	0	-1.35747	0.452489	2.26244	2.26244
	2	GLKA560	F	-/-	CDmcb-Saline	0	-0.833333	0	1.25	1.25
	3	GLKA550	F	+/+	CD-5FU	0	-3.00429	-2.57511	-3.43348	-5.15021
	3	GLKA528	F	-/-	CD-5FU	0	-5.12821	-5.98291	-6.83761	-12.3932
	3	GLKA610	F	-/-	CD-5FU	0	-1.0101	-3.0303	-3.0303	-4.54545
	3	GLKA562	F	+/+	CD-5FU	0	-2.94118	-3.92157	-9.31373	-12.7451
	3	GLKA568	F	-/-	CD-5FU	0	-5.31401	-6.28019	-10.1449	-13.5266
	4	GLKA570	F	-/-	CDmcb-5FU	0	-2.40964	-6.0241	-7.63052	-6.0241
	4	GLKA542	F	-/-	CDmcb-5FU	0	-3.44828	-8.18966	-8.18966	-8.18966
	4	GLKA612	F	-/-	CDmcb-5FU	0	-3.18182	-6.36364	-8.18182	-5.90909
	4	GLKA554	F	+/+	CDmcb-5FU	0	-4.16667	-7.08333	-9.58333	-9.16667
	4	GLKA548	F	+/+	CDmcb-5FU	0	-1.17647	-2.7451	-5.09804	-5.88235
	5	618	F	+/+	CD-Saline	0	3.91304	6.08696	7.3913	8.69565
	5	628	F	-/-	CD-Saline	0	8.51064	8.51064	7.23404	20.4255
	5	632	F	+/+	CD-Saline	0	8.76494	7.56972	7.56972	6.77291
	5	640	F	-/-	CD-Saline	0	5.85586	6.30631	7.65766	4.5045
	6	642	F	-/-	CD-5FU	0	0.413223	2.47934	-2.89256	-4.54545
	6	648	F	+/+	CD-5FU	0	-2.29358	-4.12844	-7.79817	-5.04587
	6	654	F	-/-	CD-5FU	0	0.913242	-0.456621	-5.93607	-7.30594
	6	656	F	+/+	CD-5FU	0	-1.86916	-1.86916	-4.20561	-2.80374
	7	668	F	+/+	CD-5FU	0	0.510204	2.04082	-1.53061	-3.06122
	7	670	F	-/-	CD-5FU	0	3.28638	3.28638	0	0
	8	662	F	+/+	CDmcb-5FU	0	-3.0303	-6.56566	-8.58586	-2.52525
	8	664	F	+/+	CDmcb-5FU	0	-1.35747	-4.0724	-6.78733	-3.61991
	8	666	F	-/-	CDmcb-5FU	0	-1.94175	-7.76699	-7.28155	-4.36893
	9	676	F	+/+	CDmcb-5FU	0	-2.29358	-5.50459	-5.04587	-3.66972
	9	678	F	-/-	CDmcb-5FU	0	-0.490196	-2.94118	-6.86275	-6.86275
	9	682	F	-/-	CDmcb-5FU	0	2.05479	0	-6.84932	-11.6438
	9	684	F	+/+	CDmcb-5FU	0	-7.05882	-5.29412	-5.29412	-1.17647
	10	686	F	+/+	CDmcb-Saline	0	-1.20482	0.60241	1.20482	3.61446
	10	688	F	-/-	CDmcb-Saline	0	0.534759	-0.534759	2.13904	2.6738
	10	694	F	-/-	CDmcb-Saline	0	-1.70455	2.27273	3.97727	2.84091
	11	696	F	-/-	CDmcb-Saline	0	3.59281	2.39521	2.99401	5.98802
	11	702	F	+/+	CDmcb-Saline	0	-1.71429	-1.71429	0.571429	1.71429
	11	706	F	+/+	CDmcb-Saline	0	2.71739	1.08696	0	2.17391
	12	714	F	-/-	CD-Saline	0	-0.606061	-1.81818	6.06061	4.84848
	12	716	F	+/+	CD-Saline	0	-1.81818	-2.42424	4.24242	6.06061
	13	734	F	-/-	CD-Saline	0	7.20721	7.20721	5.85586	4.05405
	13	772	F	+/+	CD-Saline	0	3.06122	3.06122	2.04082	3.57143
	14	756	F	-/-	CD-5FU	0	-0.970874	-4.85437	-8.73786	-11.165
	14	762	F	+/+	CD-5FU	0	0.490196	-1.96078	-5.39216	-5.88235
	14	766	F	-/-	CD-5FU	0	-4.92611	-8.867	-12.8079	-6.89655
	14	750	F	+/+	CD-5FU	0	-2.85714	-5.30612	-11.4286	-8.57143
	14	776	F	+/+	CD-5FU	0	3.10881	3.10881	-2.07254	-2.07254
	15	730	F	+/+	CDmcb-Saline	0	2.94118	2.45098	2.45098	1.96078
	15	732	F	-/-	CDmcb-Saline	0	1.87793	1.40845	1.40845	0.938967
	15	722	F	+/+	CDmcb-Saline	0	-0.409836	0.819672	-0.409836	1.22951
	16	736	F	-/-	CDmcb-5FU	0	-6.22222	-11.5556	-15.5556	-15.1111
	16	768	F	+/+	CDmcb-5FU	0	-3.33333	-7.14286	-6.66667	-5.2381
	16	752	F	+/+	CDmcb-5FU	0	-2.04918	-5.7377	-10.6557	-8.19672
	16	780	F	-/-	CDmcb-5FU	0	0	-6.28272	-11.5183	-12.0419
	16	784	F	+/+	CDmcb-5FU	0	-4.14508	-10.8808	-13.9896	-15.0259
	17	774	F	+/+	CD-Saline	0	0.552486	6.62983	13.2597	9.94475
	18	786	F	+/+	CDmcb-5FU	0	-6.22568	-9.72763	-12.4514	-12.0623
	18	790	F	-/-	CDmcb-5FU	0	-4.91803	-8.52459	-15.082	-18.0328
	19	794	F	-/-	CDmcb-Saline	0	0	-0.862069	-1.72414	0.431034
	19	796	F	+/+	CDmcb-Saline	0	-1.63934	-4.5082	-3.27869	-4.09836
	19	808	F	-/-	CDmcb-Saline	0	-1.68776	-1.68776	-0.843882	-2.95359
	19	812	F	-/-	CDmcb-Saline	0	0.909091	-0.909091	-0.454545	0.454545
	20	802	F	-/-	CD-5FU	0	-3.6036	-2.7027	-7.20721	-6.30631
	20	806	F	-/-	CD-5FU	0	-1.32743	-0.442478	-3.53982	-6.63717
	20	824	F	+/+	CD-5FU	0	-3.65854	-5.28455	-10.9756	-11.7886
	21	814	F	-/-	CD-Saline	0	0	-1.39535	0.465116	2.7907
	21	816	F	+/+	CD-Saline	0	-1.33333	-3.11111	-1.77778	0.888889
	21	818	F	-/-	CD-Saline	0	1.64609	1.23457	2.46914	0.823045
	21	820	F	-/-	CD-Saline	0	0.843882	-1.68776	-2.53165	1.68776

## Sheet: Necropsy (R)
Comments	Cage_ID	Mouse_ID	Sex	Genotype	Group	Spleen	Liver	Cecum	Small Intestine	Colon	Colon length	Colon length w/o carnoy	SpleenToBW	LiverToBW	CecumToBW	SmallToBW	ColonToBW	ColonIndex
	1	GLKA572	F	+/+	CD-Saline	0.075	1.04	0.256	0.76	0.078	7.8	6.7	0.336323	4.66368	1.14798	3.40807	0.349776	11.6418
	1	GLKA556	F	-/-	CD-Saline	0.085	1.429	0.231	0.86	0.123	7.2	6.1	0.285235	4.7953	0.775168	2.88591	0.412752	20.1639
	1	GLKA594	F	-/-	CD-Saline	0.085	1.179	0.246	0.818	0.113	7.7	6.7	0.372807	5.17105	1.07895	3.58772	0.495614	16.8657
	2	GLKA586	F	+/+	CDmcb-Saline	0.107	1.187	0.379	0.926	0.098	7.7	6.6	0.419608	4.6549	1.48627	3.63137	0.384314	14.8485
	2	GLKA608	F	-/-	CDmcb-Saline	0.092	0.933	0.211	0.82	0.078	6.6	5.5	0.440191	4.46411	1.00957	3.92344	0.373206	14.1818
	2	GLKA620	F	-/-	CDmcb-Saline	0.076	0.968	0.23	0.732	0.088	6.4	5.4	0.356808	4.5446	1.07981	3.43662	0.413146	16.2963
	2	GLKA558	F	+/+	CDmcb-Saline	0.099	1.12	0.307	0.81	0.103	7.1	6.1	0.438053	4.95575	1.35841	3.58407	0.455752	16.8852
	2	GLKA560	F	-/-	CDmcb-Saline	0.102	1.046	0.269	0.96	0.096	7.1	6	0.419753	4.30453	1.107	3.95062	0.395062	16
	3	GLKA550	F	+/+	CD-5FU	0.042	1.048	0.176		0.099	6.5	5.5	0.190045	4.74208	0.79638		0.447964	18
	3	GLKA528	F	-/-	CD-5FU	0.054	0.913	0.103		0.104	6.2	5.1	0.263415	4.45366	0.502439		0.507317	20.3922
	3	GLKA610	F	-/-	CD-5FU	0.044	0.933	0.169	0.649	0.12	6.3	5.3	0.232804	4.93651	0.89418	3.43386	0.634921	22.6415
	3	GLKA562	F	+/+	CD-5FU	0.035	0.809	0.092	0.561	0.097	5.8	4.8	0.196629	4.54494	0.516854	3.15169	0.544944	20.2083
	3	GLKA568	F	-/-	CD-5FU	0.048	0.578	0.094	0.51	0.098	5.9	4.9	0.268156	3.22905	0.52514	2.84916	0.547486	20
	4	GLKA570	F	-/-	CDmcb-5FU	0.063	1.05	0.308	0.746	0.2	6.7	5.6	0.269231	4.48718	1.31624	3.18803	0.854701	35.7143
	4	GLKA542	F	-/-	CDmcb-5FU	0.046	0.92	0.479	0.742	0.21	7.2	6.1	0.215962	4.31925	2.24883	3.48357	0.985915	34.4262
	4	GLKA612	F	-/-	CDmcb-5FU	0.046	0.979	0.405	0.727	0.072	8	7	0.222222	4.72947	1.95652	3.51208	0.347826	10.2857
	4	GLKA554	F	+/+	CDmcb-5FU	0.059	0.907	0.401	0.782	0.096	6.5	5.5	0.270642	4.16055	1.83945	3.58716	0.440367	17.4545
	4	GLKA548	F	+/+	CDmcb-5FU	0.072	0.879	0.503	0.905	0.113	8.3	7.2	0.3	3.6625	2.09583	3.77083	0.470833	15.6944
	5	618	F	+/+	CD-Saline	0.076	1.197	0.31	0.852	0.101	6	5	0.304	4.788	1.24	3.408	0.404	20.2
	5	628	F	-/-	CD-Saline	0.107	1.208	0.269	0.701	0.102	5.6	4.5	0.378092	4.26855	0.95053	2.47703	0.360424	22.6667
	5	632	F	+/+	CD-Saline	0.097	1.212	0.25	0.925	0.065	8.1	7	0.36194	4.52239	0.932836	3.45149	0.242537	9.28571
	5	640	F	-/-	CD-Saline	0.095	1.045	0.287	0.726	0.094	7.1	6.1	0.409483	4.50431	1.23707	3.12931	0.405172	15.4098
	6	642	F	-/-	CD-5FU	0.041	1.078	0.214	0.61	0.104	6.4	5.3	0.177489	4.66667	0.926407	2.64069	0.450216	19.6226
	6	648	F	+/+	CD-5FU	0.04	1.048	0.384	0.66	0.108	6.4	5.3	0.193237	5.0628	1.85507	3.18841	0.521739	20.3774
	6	654	F	-/-	CD-5FU	0.045	0.96	0.183	0.578	0.115	6.9	5.9	0.221675	4.72906	0.901478	2.84729	0.566502	19.4915
	6	656	F	+/+	CD-5FU	0.039	1.02	0.397	0.635	0.125	7.1	6	0.1875	4.90385	1.90865	3.05288	0.600962	20.8333
	7	668	F	+/+	CD-5FU	0.027	0.884	0.163	0.5	0.09	6	5	0.142105	4.65263	0.857895	2.63158	0.473684	18
	7	670	F	-/-	CD-5FU	0.036	0.971	0.2	0.531	0.091	6.6	5.6	0.169014	4.55869	0.938967	2.49296	0.42723	16.25
	8	662	F	+/+	CDmcb-5FU	0.039	1.035	0.423	0.889	0.092	7.5	6.4	0.202073	5.36269	2.19171	4.60622	0.476684	14.375
	8	664	F	+/+	CDmcb-5FU	0.046	1.045	0.41	0.848	0.102	7.5	6.4	0.215962	4.9061	1.92488	3.98122	0.478873	15.9375
	8	666	F	-/-	CDmcb-5FU	0.052	0.933	0.343	0.678	0.105	6.6	5.6	0.263959	4.73604	1.74112	3.44162	0.532995	18.75
	9	676	F	+/+	CDmcb-5FU	0.063	1.088	0.431	0.775	0.103	7.1	6.1	0.3	5.18095	2.05238	3.69048	0.490476	16.8852
	9	678	F	-/-	CDmcb-5FU	0.048	0.868	0.334	0.61	0.092	7.4	6.4	0.252632	4.56842	1.75789	3.21053	0.484211	14.375
	9	682	F	-/-	CDmcb-5FU	0.029	0.635	0.183	0.524	0.091	5.8	4.8	0.224806	4.92248	1.4186	4.06202	0.705426	18.9583
	9	684	F	+/+	CDmcb-5FU	0.034	0.883	0.32	0.894	0.098	7.2	6.2	0.202381	5.25595	1.90476	5.32143	0.583333	15.8065
	10	686	F	+/+	CDmcb-Saline	0.103	0.854	0.299	0.793	0.078	6.5	5.6	0.598837	4.96512	1.73837	4.61047	0.453488	13.9286
	10	688	F	-/-	CDmcb-Saline	0.091	0.944	0.276	0.82	0.087	6.9	5.9	0.473958	4.91667	1.4375	4.27083	0.453125	14.7458
	10	694	F	-/-	CDmcb-Saline	0.052	0.909	0.219	0.734	0.072	8.3	7.2	0.287293	5.0221	1.20994	4.05525	0.39779	10
	11	696	F	-/-	CDmcb-Saline	0.084	0.919	0.202	0.696	0.081	6.7	5.8	0.474576	5.19209	1.14124	3.9322	0.457627	13.9655
	11	702	F	+/+	CDmcb-Saline	0.09	0.9	0.257	0.75	0.078	6.5	5.5	0.505618	5.05618	1.44382	4.21348	0.438202	14.1818
	11	706	F	+/+	CDmcb-Saline	0.093	1.064	0.245	0.812		6.3		0.494681	5.65957	1.30319	4.31915
	12	714	F	-/-	CD-Saline	0.07	0.811	0.243	0.546	0.077	6	5	0.404624	4.68786	1.40462	3.15607	0.445087	15.4
	12	716	F	+/+	CD-Saline	0.057	0.906	0.237	0.555	0.069	5.9	4.9	0.325714	5.17714	1.35429	3.17143	0.394286	14.0816
	13	734	F	-/-	CD-Saline	0.085	1.047	0.18	0.832	0.111	6.8	5.8	0.367965	4.53247	0.779221	3.60173	0.480519	19.1379
	13	772	F	+/+	CD-Saline	0.051	0.995	0.219	0.703	0.094	6.9	5.9	0.251232	4.90148	1.07882	3.46305	0.463054	15.9322
	14	756	F	-/-	CD-5FU	0.039	0.885	0.086	0.563	0.124	4.7	4	0.213115	4.83607	0.469945	3.0765	0.677596	31
	14	762	F	+/+	CD-5FU	0.041	0.902	0.314	0.69	0.096	4.8	4	0.213542	4.69792	1.63542	3.59375	0.5	24
	14	766	F	-/-	CD-5FU	0.042	0.781	0.151	0.529	0.127	5.7	4.8	0.222222	4.13228	0.798942	2.79894	0.671958	26.4583
	14	750	F	+/+	CD-5FU	0.049	1.125	0.283	0.746	0.104	5.5	4.6	0.21875	5.02232	1.26339	3.33036	0.464286	22.6087
	14	776	F	+/+	CD-5FU	0.031	0.901	0.146	0.562	0.094	5.6	4.6	0.164021	4.7672	0.772487	2.97354	0.497354	20.4348
	15	730	F	+/+	CDmcb-Saline	0.094	1.003	0.316	0.88	0.104	5.9	5	0.451923	4.82212	1.51923	4.23077	0.5	20.8
	15	732	F	-/-	CDmcb-Saline	0.097	1.028	0.206	0.882	0.097	6.2	5.3	0.451163	4.7814	0.95814	4.10233	0.451163	18.3019
	15	722	F	+/+	CDmcb-Saline	0.108	1.215	0.313	1.069	0.11	6.7	5.8	0.437247	4.91903	1.26721	4.32794	0.445344	18.9655
	16	736	F	-/-	CDmcb-5FU	0.046	0.868	0.521	0.684	0.117	6	5.3	0.240838	4.5445	2.72775	3.58115	0.612565	22.0755
	16	768	F	+/+	CDmcb-5FU	0.042	1.002	0.295	0.848	0.079	6.3	5.2	0.211055	5.03518	1.48241	4.26131	0.396985	15.1923
	16	752	F	+/+	CDmcb-5FU	0.054	1.097	0.326	0.81	0.126	6.5	5.5	0.241071	4.89732	1.45536	3.61607	0.5625	22.9091
	16	780	F	-/-	CDmcb-5FU	0.038	0.75	0.388	0.57	0.091	5.6	4.7	0.22619	4.46429	2.30952	3.39286	0.541667	19.3617
	16	784	F	+/+	CDmcb-5FU	0.038	0.866	0.29	0.698	0.098	5.6	5	0.231707	5.28049	1.76829	4.2561	0.597561	19.6
	17	774	F	+/+	CD-Saline	0.054	1.117	0.196	0.702	0.097	6.7	5.9	0.271357	5.61307	0.984925	3.52764	0.487437	16.4407
	18	786	F	+/+	CDmcb-5FU	0.07	1.079	0.39		0.106	5.9	5	0.309735	4.77434	1.72566		0.469027	21.2
Excluded due to poor injection	18	790	F	-/-	CDmcb-5FU	0.068	1.145	0.262	1.149	0.11	6.5	5.7	0.272	4.58	1.048	4.596	0.44	19.2982
	19	794	F	-/-	CDmcb-Saline	0.114	1.163	0.227	1.014	0.102	6	5.2	0.48927	4.99142	0.974249	4.35193	0.437768	19.6154
	19	796	F	+/+	CDmcb-Saline	0.108	1.128	0.327	1.075	0.103	7.9	6.7	0.461538	4.82051	1.39744	4.59402	0.440171	15.3731
	19	808	F	-/-	CDmcb-Saline	0.12	1.147	0.249	0.994	0.139	7	6.1	0.521739	4.98696	1.08261	4.32174	0.604348	22.7869
	19	812	F	-/-	CDmcb-Saline	0.102	1.072	0.24	0.981	0.125	7.3	6.4	0.461538	4.85068	1.08597	4.43891	0.565611	19.5312
	20	802	F	-/-	CD-5FU	0.042	1.028	0.186	0.749	0.113	6	5.1	0.201923	4.94231	0.894231	3.60096	0.543269	22.1569
	20	806	F	-/-	CD-5FU	0.054	1.075	0.235	0.83	0.133	5.5	4.5	0.255924	5.09479	1.11374	3.93365	0.630332	29.5556
	20	824	F	+/+	CD-5FU	0.05	1.105	0.179	0.825	0.158	6.4	5.6	0.230415	5.09217	0.824885	3.80184	0.728111	28.2143
	21	814	F	-/-	CD-Saline	0.096	1.152	0.244	0.876	0.101	6.5	5.6	0.434389	5.21267	1.10407	3.9638	0.457014	18.0357
	21	816	F	+/+	CD-Saline	0.098	1.251	0.252	0.924	0.128	7.5	6.6	0.431718	5.51101	1.11013	4.07048	0.563877	19.3939
	21	818	F	-/-	CD-Saline	0.104	1.274	0.25	1.121	0.14	6.7	5.6	0.42449	5.2	1.02041	4.57551	0.571429	25
	21	820	F	-/-	CD-Saline	0.105	1.267	0.265	0.824	0.12	6.5	5.7	0.435685	5.25726	1.09959	3.41909	0.497925	21.0526

## Sheet: Biomarker (R)
Comments	Cage_ID	Mouse_ID	Sex	Genotype	Group	MPO_Jejunum	MPO_Ileum
	1	GLKA556	F	-/-	CD-Saline	0.886742	1.32629
	1	GLKA572	F	+/+	CD-Saline	0.723293	1.70731
	1	GLKA594	F	-/-	CD-Saline	1.4127	0.803563
	2	GLKA558	F	+/+	CDmcb-Saline	2.05403	0.977125
	2	GLKA560	F	-/-	CDmcb-Saline	1.69559	3.37652
	2	GLKA586	F	+/+	CDmcb-Saline	2.10416	1.36147
	2	GLKA608	F	-/-	CDmcb-Saline	1.35244	2.30133
	2	GLKA620	F	-/-	CDmcb-Saline	1.62842	1.05297
	3	GLKA528	F	-/-	CD-5FU	3.3719	1.954
	3	GLKA550	F	+/+	CD-5FU	2.14492	4.36129
	3	GLKA562	F	+/+	CD-5FU	4.47226	4.27041
	3	GLKA568	F	-/-	CD-5FU	8.24635	3.29033
	3	GLKA610	F	-/-	CD-5FU	4.44686	5.43213
	4	GLKA542	F	-/-	CDmcb-5FU	1.28853	0.492773
	4	GLKA548	F	+/+	CDmcb-5FU	2.11937	1.84869
	4	GLKA554	F	+/+	CDmcb-5FU	1.20106	1.26262
	4	GLKA570	F	-/-	CDmcb-5FU	5.09506	3.02752
	4	GLKA612	F	-/-	CDmcb-5FU	2.77283	3.15527
	5	618	F	+/+	CD-Saline	1.4199	1.27599
	5	628	F	-/-	CD-Saline	1.92408	2.46711
	5	632	F	+/+	CD-Saline	2.16312	2.68556
	5	640	F	-/-	CD-Saline	1.96345	0.354099
	6	642	F	-/-	CD-5FU	4.0459	12.0912
	6	648	F	+/+	CD-5FU	2.52658	13.0569
	6	654	F	-/-	CD-5FU	5.38258	7.23218
	6	656	F	+/+	CD-5FU	3.9418	5.41351
	7	668	F	+/+	CD-5FU	4.33214	11.6377
	7	670	F	-/-	CD-5FU	2.29803	11.6009
	8	662	F	+/+	CDmcb-5FU	1.81322	3.45958
	8	664	F	+/+	CDmcb-5FU	2.67182	1.89516
	8	666	F	-/-	CDmcb-5FU	5.3779	8.96155
	9	676	F	+/+	CDmcb-5FU	1.87854	1.73887
	9	678	F	-/-	CDmcb-5FU	3.29742	4.50762
	9	682	F	-/-	CDmcb-5FU	5.39833	4.85416
	9	684	F	+/+	CDmcb-5FU	2.04699	2.6595
	10	686	F	+/+	CDmcb-Saline	0.784573	0.325357
	10	688	F	-/-	CDmcb-Saline	3.97829	3.82245
	10	694	F	-/-	CDmcb-Saline	2.83278	2.2883
	11	696	F	-/-	CDmcb-Saline	1.26266	1.37666
	11	702	F	+/+	CDmcb-Saline	2.14246	1.98603
	11	706	F	+/+	CDmcb-Saline	2.22293	2.03659
	12	714	F	-/-	CD-Saline	3.71348	4.28847
	12	716	F	+/+	CD-Saline	3.5933	2.78621
	13	734	F	-/-	CD-Saline	1.94503	4.76325
	13	772	F	+/+	CD-Saline	0.824864	2.56478
	14	756	F	-/-	CD-5FU	3.23961	10.5543
	14	762	F	+/+	CD-5FU	2.85111	4.09669
	14	766	F	-/-	CD-5FU	3.95805	6.72273
	14	750	F	+/+	CD-5FU	4.2108	7.4725
	14	776	F	+/+	CD-5FU	2.1505	7.18797
	15	730	F	+/+	CDmcb-Saline	1.48938	1.00594
	15	732	F	-/-	CDmcb-Saline	1.46219	3.24273
	15	722	F	+/+	CDmcb-Saline	0.758928	1.98793
	16	736	F	-/-	CDmcb-5FU	3.10542	3.70087
	16	768	F	+/+	CDmcb-5FU	1.16352	2.87317
	16	752	F	+/+	CDmcb-5FU	1.97209	1.58811
	16	780	F	-/-	CDmcb-5FU	6.9252	7.59583
	16	784	F	+/+	CDmcb-5FU	4.88871	4.39287
	17	774	F	+/+	CD-Saline	1.63901	3.14434
	18	786	F	+/+	CDmcb-5FU	6.51885	3.50577
	18	790	F	-/-	CDmcb-5FU	6.61358	3.60776
	19	794	F	-/-	CDmcb-Saline	1.72328	3.59407
	19	796	F	+/+	CDmcb-Saline	1.79119	2.84009
	19	808	F	-/-	CDmcb-Saline	2.55891	5.34884
	19	812	F	-/-	CDmcb-Saline	1.84606	4.13746
	20	802	F	-/-	CD-5FU	9.00567	8.27424
	20	806	F	-/-	CD-5FU	3.96913	5.30252
	20	824	F	+/+	CD-5FU	12.9274	13.9122
	21	814	F	-/-	CD-Saline	1.91752	2.36054
	21	816	F	+/+	CD-Saline	0.610973	1.48209
	21	818	F	-/-	CD-Saline	1.66063	2.47049
	21	820	F	-/-	CD-Saline	2.25839	3.01432

## Sheet: ∆Recovery
	Cage_ID	Mouse_ID	Sex	Genotype	Group	Absolute	Pct
	1	GLKA572	F	+/+	CD-Saline	0	0
	1	GLKA556	F	-/-	CD-Saline	-1.1	-3.66667
	1	GLKA594	F	-/-	CD-Saline	-0.3	-1.31579
	2	GLKA586	F	+/+	CDmcb-Saline	0.3	1.1811
	2	GLKA608	F	-/-	CDmcb-Saline	0.1	0.497512
	2	GLKA620	F	-/-	CDmcb-Saline	0.3	1.44928
	2	GLKA558	F	+/+	CDmcb-Saline	0	0
	2	GLKA560	F	-/-	CDmcb-Saline	0	0
	3	GLKA550	F	+/+	CD-5FU	-0.4	-1.71674
	3	GLKA528	F	-/-	CD-5FU	-1.3	-5.55556
	3	GLKA610	F	-/-	CD-5FU	-0.3	-1.51515
	3	GLKA562	F	+/+	CD-5FU	-0.7	-3.43137
	3	GLKA568	F	-/-	CD-5FU	-0.7	-3.38164
	4	GLKA570	F	-/-	CDmcb-5FU	0.4	1.60643
	4	GLKA542	F	-/-	CDmcb-5FU	0	0
	4	GLKA612	F	-/-	CDmcb-5FU	0.5	2.27273
	4	GLKA554	F	+/+	CDmcb-5FU	0.1	0.416667
	4	GLKA548	F	+/+	CDmcb-5FU	-0.2	-0.784314
	5	618	F	+/+	CD-Saline	0.3	1.30435
	5	628	F	-/-	CD-Saline	3.1	13.1915
	5	632	F	+/+	CD-Saline	-0.2	-0.796813
	5	640	F	-/-	CD-Saline	-0.7	-3.15315
	6	642	F	-/-	CD-5FU	-0.4	-1.65289
	6	648	F	+/+	CD-5FU	0.6	2.75229
	6	654	F	-/-	CD-5FU	-0.3	-1.36986
	6	656	F	+/+	CD-5FU	0.3	1.40187
	7	668	F	+/+	CD-5FU	-0.3	-1.53061
	7	670	F	-/-	CD-5FU	0	0
	8	662	F	+/+	CDmcb-5FU	1.2	6.06061
	8	664	F	+/+	CDmcb-5FU	0.7	3.16742
	8	666	F	-/-	CDmcb-5FU	0.6	2.91262
	9	676	F	+/+	CDmcb-5FU	0.3	1.37615
	9	678	F	-/-	CDmcb-5FU	0	0
	9	682	F	-/-	CDmcb-5FU	-0.7	-4.79452
	9	684	F	+/+	CDmcb-5FU	0.7	4.11765
	10	686	F	+/+	CDmcb-Saline	0.4	2.40964
	10	688	F	-/-	CDmcb-Saline	0.1	0.534759
	10	694	F	-/-	CDmcb-Saline	-0.2	-1.13636
	11	696	F	-/-	CDmcb-Saline	0.5	2.99401
	11	702	F	+/+	CDmcb-Saline	0.2	1.14286
	11	706	F	+/+	CDmcb-Saline	0.4	2.17391
	12	714	F	-/-	CD-Saline	-0.2	-1.21212
	12	716	F	+/+	CD-Saline	0.3	1.81818
	13	734	F	-/-	CD-Saline	-0.4	-1.8018
	13	772	F	+/+	CD-Saline	0.3	1.53061
	14	756	F	-/-	CD-5FU	-0.5	-2.42718
	14	762	F	+/+	CD-5FU	-0.1	-0.490196
	14	766	F	-/-	CD-5FU	1.2	5.91133
	14	750	F	+/+	CD-5FU	0.7	2.85714
	14	776	F	+/+	CD-5FU	0	0
	15	730	F	+/+	CDmcb-Saline	-0.1	-0.490196
	15	732	F	-/-	CDmcb-Saline	-0.1	-0.469484
	15	722	F	+/+	CDmcb-Saline	0.4	1.63934
	16	736	F	-/-	CDmcb-5FU	0.1	0.444444
	16	768	F	+/+	CDmcb-5FU	0.3	1.42857
	16	752	F	+/+	CDmcb-5FU	0.6	2.45902
	16	780	F	-/-	CDmcb-5FU	-0.1	-0.52356
	16	784	F	+/+	CDmcb-5FU	-0.2	-1.03627
	17	774	F	+/+	CD-Saline	-0.6	-3.31492
	18	786	F	+/+	CDmcb-5FU	0.1	0.389105
	18	790	F	-/-	CDmcb-5FU	-0.9	-2.95082
	19	794	F	-/-	CDmcb-Saline	0.5	2.15517
	19	796	F	+/+	CDmcb-Saline	-0.2	-0.819672
	19	808	F	-/-	CDmcb-Saline	-0.5	-2.1097
	19	812	F	-/-	CDmcb-Saline	0.2	0.909091
	20	802	F	-/-	CD-5FU	0.2	0.900901
	20	806	F	-/-	CD-5FU	-0.7	-3.09735
	20	824	F	+/+	CD-5FU	-0.2	-0.813008
	21	814	F	-/-	CD-Saline	0.5	2.32558
	21	816	F	+/+	CD-Saline	0.6	2.66667
	21	818	F	-/-	CD-Saline	-0.4	-1.64609
	21	820	F	-/-	CD-Saline	1	4.21941

## Sheet: Day0vs4
	Cage_ID	Mouse_ID	Sex	Genotype	Group	Absolute	Pct
	1	GLKA572	F	+/+	CD-Saline	-0.4	-1.76211
	1	GLKA556	F	-/-	CD-Saline	-0.2	-0.666667
	1	GLKA594	F	-/-	CD-Saline	0	0
	2	GLKA586	F	+/+	CDmcb-Saline	0.1	0.393701
	2	GLKA608	F	-/-	CDmcb-Saline	0.8	3.9801
	2	GLKA620	F	-/-	CDmcb-Saline	0.6	2.89855
	2	GLKA558	F	+/+	CDmcb-Saline	0.5	2.26244
	2	GLKA560	F	-/-	CDmcb-Saline	0.3	1.25
	3	GLKA550	F	+/+	CD-5FU	-1.2	-5.15021
	3	GLKA528	F	-/-	CD-5FU	-2.9	-12.3932
	3	GLKA610	F	-/-	CD-5FU	-0.9	-4.54545
	3	GLKA562	F	+/+	CD-5FU	-2.6	-12.7451
	3	GLKA568	F	-/-	CD-5FU	-2.8	-13.5266
	4	GLKA570	F	-/-	CDmcb-5FU	-1.5	-6.0241
	4	GLKA542	F	-/-	CDmcb-5FU	-1.9	-8.18966
	4	GLKA612	F	-/-	CDmcb-5FU	-1.3	-5.90909
	4	GLKA554	F	+/+	CDmcb-5FU	-2.2	-9.16667
	4	GLKA548	F	+/+	CDmcb-5FU	-1.5	-5.88235
	5	618	F	+/+	CD-Saline	2	8.69565
	5	628	F	-/-	CD-Saline	4.8	20.4255
	5	632	F	+/+	CD-Saline	1.7	6.77291
	5	640	F	-/-	CD-Saline	1	4.5045
	6	642	F	-/-	CD-5FU	-1.1	-4.54545
	6	648	F	+/+	CD-5FU	-1.1	-5.04587
	6	654	F	-/-	CD-5FU	-1.6	-7.30594
	6	656	F	+/+	CD-5FU	-0.6	-2.80374
	7	668	F	+/+	CD-5FU	-0.6	-3.06122
	7	670	F	-/-	CD-5FU	0	0
	8	662	F	+/+	CDmcb-5FU	-0.5	-2.52525
	8	664	F	+/+	CDmcb-5FU	-0.8	-3.61991
	8	666	F	-/-	CDmcb-5FU	-0.9	-4.36893
	9	676	F	+/+	CDmcb-5FU	-0.8	-3.66972
	9	678	F	-/-	CDmcb-5FU	-1.4	-6.86275
	9	682	F	-/-	CDmcb-5FU	-1.7	-11.6438
	9	684	F	+/+	CDmcb-5FU	-0.2	-1.17647
	10	686	F	+/+	CDmcb-Saline	0.6	3.61446
	10	688	F	-/-	CDmcb-Saline	0.5	2.6738
	10	694	F	-/-	CDmcb-Saline	0.5	2.84091
	11	696	F	-/-	CDmcb-Saline	1	5.98802
	11	702	F	+/+	CDmcb-Saline	0.3	1.71429
	11	706	F	+/+	CDmcb-Saline	0.4	2.17391
	12	714	F	-/-	CD-Saline	0.8	4.84848
	12	716	F	+/+	CD-Saline	1	6.06061
	13	734	F	-/-	CD-Saline	0.9	4.05405
	13	772	F	+/+	CD-Saline	0.7	3.57143
	14	756	F	-/-	CD-5FU	-2.3	-11.165
	14	762	F	+/+	CD-5FU	-1.2	-5.88235
	14	766	F	-/-	CD-5FU	-1.4	-6.89655
	14	750	F	+/+	CD-5FU	-2.1	-8.57143
	14	776	F	+/+	CD-5FU	-0.4	-2.07254
	15	730	F	+/+	CDmcb-Saline	0.4	1.96078
	15	732	F	-/-	CDmcb-Saline	0.2	0.938967
	15	722	F	+/+	CDmcb-Saline	0.3	1.22951
	16	736	F	-/-	CDmcb-5FU	-3.4	-15.1111
	16	768	F	+/+	CDmcb-5FU	-1.1	-5.2381
	16	752	F	+/+	CDmcb-5FU	-2	-8.19672
	16	780	F	-/-	CDmcb-5FU	-2.3	-12.0419
	16	784	F	+/+	CDmcb-5FU	-2.9	-15.0259
	17	774	F	+/+	CD-Saline	1.8	9.94475
	18	786	F	+/+	CDmcb-5FU	-3.1	-12.0623
	18	790	F	-/-	CDmcb-5FU	-5.5	-18.0328
	19	794	F	-/-	CDmcb-Saline	0.1	0.431034
	19	796	F	+/+	CDmcb-Saline	-1	-4.09836
	19	808	F	-/-	CDmcb-Saline	-0.7	-2.95359
	19	812	F	-/-	CDmcb-Saline	0.1	0.454545
	20	802	F	-/-	CD-5FU	-1.4	-6.30631
	20	806	F	-/-	CD-5FU	-1.5	-6.63717
	20	824	F	+/+	CD-5FU	-2.9	-11.7886
	21	814	F	-/-	CD-Saline	0.6	2.7907
	21	816	F	+/+	CD-Saline	0.2	0.888889
	21	818	F	-/-	CD-Saline	0.2	0.823045
	21	820	F	-/-	CD-Saline	0.4	1.68776

## Sheet: Histology
	Cage_ID	Mouse_ID	Sex	Genotype	Group	Duodenum - Villus height	Duodenum - Crypt depth	Jejunum - Villus height	Jejunum - Crypt depth	Ileum - Villus height	Ileum - Crypt depth	Prox. Colon - Crypt depth
	1	GLKA572	F	+/+	CD-Saline	485.66	92.2227	378.079	96.0367
	1	GLKA556	F	-/-	CD-Saline	523.626	94.043	326.761	97.704	252.72	103.647	145.311
	1	GLKA594	F	-/-	CD-Saline	405.886	85.9923	332.756	86.0937	241.841	108.059	159.944
	2	GLKA586	F	+/+	CDmcb-Saline	566.294	122.472	408.39	116.378	328.189	135.097	129.803
	2	GLKA608	F	-/-	CDmcb-Saline	490.736	123.783	363.799	118.907	240.349	115.459	142.655
	2	GLKA620	F	-/-	CDmcb-Saline	530.992	109.784	349.212	109.45	267.636	110.474	135.959
	2	GLKA558	F	+/+	CDmcb-Saline	560.977	112.333	369.277	113.283	276.055	111.462	129.408
	2	GLKA560	F	-/-	CDmcb-Saline			357.177	116.092	272.204	113.751	134.717
	3	GLKA550	F	+/+	CD-5FU	404.516	98.1557	306.422	98.0923	169.241	89.969	168.227
	3	GLKA528	F	-/-	CD-5FU	350.809	88.972	244.818	82.0573	178.91	103.475	145.732
	3	GLKA610	F	-/-	CD-5FU			258.645	131.61	167.118	87.0663	102.029
	3	GLKA562	F	+/+	CD-5FU	334.482	147.635	268.061	123.089	222.45	100.355
	3	GLKA568	F	-/-	CD-5FU	282.885	108.933	260.566	109.334	172.848	94.4893	157.573
	4	GLKA570	F	-/-	CDmcb-5FU	361.013	111.287	269.966	121.533	167.128	101.875	155.631
	4	GLKA542	F	-/-	CDmcb-5FU	292.841		231.107	121.657	192.922	106.897	150.849
	4	GLKA612	F	-/-	CDmcb-5FU	322.806	118.886	279.212	125.117	207.116	124.363	143.902
	4	GLKA554	F	+/+	CDmcb-5FU	437.973	120.573	312.07	120.233	239.519	127.817	154.766
	4	GLKA548	F	+/+	CDmcb-5FU	428.532	118.141	293.221	114.862	271.47	135.109	121.844
	5	618	F	+/+	CD-Saline	614.055	106.929	436.51	101.33	299.802	96.5167	153.313
	5	628	F	-/-	CD-Saline	514.412	98.517	404.918	96.115	244.483	95.83	139.124
	5	632	F	+/+	CD-Saline	507.016	98.0553	425.188	100.328	273.337	108.156	142.382
	5	640	F	-/-	CD-Saline	444.832	89.3257	397.515	102.278	268.255	100.922	154.379
	6	642	F	-/-	CD-5FU	333.954	93.7713	332.145	84.969	172.577	87.4937	146.214
	6	648	F	+/+	CD-5FU	381.61	120.866	279.488	110.151	203.292	84.4123	150.748
	6	654	F	-/-	CD-5FU	353.382	104.581	219.841	97.5743
	6	656	F	+/+	CD-5FU	413.698	103.534	323.029	110.179	193.062	93.0137	171.985
	7	668	F	+/+	CD-5FU	391.843	99.6893	275.72	91.7393	172.689	84.833
	7	670	F	-/-	CD-5FU	404.149	86.7043	285.885	89.9687	177.886	101.275	158.037
	8	662	F	+/+	CDmcb-5FU	447.907	100.476	336.503	121.578	228.133	136.839	173.959
	8	664	F	+/+	CDmcb-5FU	448.058	131.663	329.206	126.776	223.474	116.336	175.441
	8	666	F	-/-	CDmcb-5FU	396.609	111.785	326.219	108.43	197.453	134.946	176.14
	9	676	F	+/+	CDmcb-5FU	438.974	131.11	452.569	138.632	220.764	121.449	184.932
	9	678	F	-/-	CDmcb-5FU	401.729	112.45	274.508	102.143	186.655	101.378	180.098
	9	682	F	-/-	CDmcb-5FU	361.916	112.507	286.449	111.884	176.686	112.961	173.416
	9	684	F	+/+	CDmcb-5FU	468.692	121.557	412.469	132.144	297.649	127.494	160.166
	10	686	F	+/+	CDmcb-Saline	712.262	131.187	437.365	114.005	327.68	116.457	177.099
	10	688	F	-/-	CDmcb-Saline	457.501	116.86	398.819	121.058	249.093	109.278	186.151
	10	694	F	-/-	CDmcb-Saline	483.952	113.672	394.596	109.081	279.852	102.358	172.39
	11	696	F	-/-	CDmcb-Saline	566.269	113.077	363.855	102.825	264.689	99.6333	152.976
	11	702	F	+/+	CDmcb-Saline	655.509	127.315	453.934	123.261	288.81	118.056	162.903
	11	706	F	+/+	CDmcb-Saline	641.182	126.466	479.893	122.808	309.743	101.524
	12	714	F	-/-	CD-Saline	464.01	98.107	402.77	95.7707	266.273	91.4287	170.286
	12	716	F	+/+	CD-Saline	624.412	99.1277	408.291		242.52		152.9
	13	734	F	-/-	CD-Saline	475.313		355.006	92.3857	279.217	106.316	163.868
	13	772	F	+/+	CD-Saline	529.149	88.2493	325.258	85.579	281.998	104.119	180.984
	14	756	F	-/-	CD-5FU	326.477	99.9283	213.519	103.471	190.15	96.3877	173.5
	14	762	F	+/+	CD-5FU	334.242	105.693	253.315	102.116	190.137	115.511	169.397
	14	766	F	-/-	CD-5FU	363.636	107.292	204.227	104.703	193.855	103.719	180.547
	14	750	F	+/+	CD-5FU	405.913	103.521	261.142	98.505	181.476	87.0827	156.598
	14	776	F	+/+	CD-5FU	371.965	103.687	264.083	93.1507	199.448	96.0093	178.966
	15	730	F	+/+	CDmcb-Saline	556.312	99.616
	15	732	F	-/-	CDmcb-Saline	512.533	110.184	340.357	106.62	274.731	105.458	151.976
	15	722	F	+/+	CDmcb-Saline	558.189	103.478	375.031	106.476	310.57	115.19	156.753
	16	736	F	-/-	CDmcb-5FU	323.384	117.984	294.161	114.911	194.868	111.002	171.453
	16	768	F	+/+	CDmcb-5FU	441.738	122.886	323.232	121.184	252.469	123.326	155.032
	16	752	F	+/+	CDmcb-5FU	415.991	120.01	312.881	124.294	246.083	121.503	188.843
	16	780	F	-/-	CDmcb-5FU					187.282	119.887	167.098
	16	784	F	+/+	CDmcb-5FU	436.999	123.953	324.85	117.012	270.618	128.479	163.507
	17	774	F	+/+	CD-Saline	595.148	101.208	389.328	99.3417	300.901	107.744	145.017
	18	786	F	+/+	CDmcb-5FU	459.118	123.737	317.302	132.587	276.185	132.214	178.653
	18	790	F	-/-	CDmcb-5FU	341.459	122.106	289.114	111.37	176.734	111.357	174.849
	19	794	F	-/-	CDmcb-Saline	505.63	103.651	305.601	105.512	281.765	112.657	155.012
	19	796	F	+/+	CDmcb-Saline	521.612	135.713	429.187	114.878	299.453	114.15	165.66
	19	808	F	-/-	CDmcb-Saline	482.511	120.108	360.047	115.753	246.097	103.33	160.594
	19	812	F	-/-	CDmcb-Saline	488.687	114.132	393.002	121.53	249.061	98.705	167.243
	20	802	F	-/-	CD-5FU	354.837	119.547	288.025	112.223	183.726	101.282	156.384
	20	806	F	-/-	CD-5FU	344.085	114.019	278.049	117.339	185.475	102.332
	20	824	F	+/+	CD-5FU	347.571		232.812	96.5033	175.559	90.7397	154.905
	21	814	F	-/-	CD-Saline	466.789	92.1143	300.792	104.814	249.247	98.4553	145.841
	21	816	F	+/+	CD-Saline	513.592	117.13	414.238	110.36	267.361	106.228	150.859
	21	818	F	-/-	CD-Saline	508.345	111.088	377.774	118.987	227.191	106.107	175.425
	21	820	F	-/-	CD-Saline	512.284	82.482	303.833	107.549	264.508	98.1927	156.807
