# Supplementary material for: Microbial Activation of the GLP-2R Mitigates Gastrointestinal Inflammation
Source: Research Square preprint supplement (doi:10.21203/rs.3.rs-6973437/v1), 2025-07-09
Supplement: Supplementary file 8 [file b767bab05a09ef2c97568467.xlsx]

## Sheet: README
THIS SHEET CONTAINS TABLES OF HISTOPATHOLOGICAL GRADING, DISEASE ACTIVITY ASSESSMENT, AND DIETARY COMPOSITIONS

## Sheet: Colon Histopathology
Feature	Grade	Description
Inflammation	0	None
	1	Slight
	2	Moderate
	3	Severe
Extent	0	None
	1	Partial mucosa
	2	Full mucosa
	3	Muosa + submucosa
Crypt Damage	0	None
	1	1/3
	2	2/3
	3	Only surface epithelium remaining
	4	Entire epithelium lost
Area Involved	1	1-25%
	2	26-50%
	3	51-75%
	4	76-100%

## Sheet: Disease Activity Index
Feature	Score
	0	1	2	3	4
% BW Loss	<1%	1-4%	5-10%	11-15%	>15%
Stool Consistency	Normal, firm	Moist/Sticky	Soft/Loose		Diarrhea, fluid
Rectal Bleeding	None	Evidence of blood in stool	Pronounced blood in stool	Bleeding from anus	Severe bleeding from anus

## Sheet: Diet Compositions
Ingredients	U	Simple Diet	Simple Diet - McB	Complex Diet	Complex Diet-McB	Complex Reference	Complex Reference - McB
Casein	%	15.900	——	2.500	——	2.950	——
FeedKind			19.500	——	19.500	——	19.500
Poultry protein	%	——	——	8.400	——	7.870	——
Soyprotein isolate	%	——	——	4.000	——	4.350	——
Wheat gluten, Vital	%	——	——	2.000	——	2.130	——
Egg yolk	%	——	——	1.600	1.000	——	——
Egg white	%	——	——	1.600	1.000	——	——
Whey powder, 71 % Lactose	%	——	——	2.900	2.900	2.380	——
L-Cystine	%	0.300	0.300	0.300	0.300	0.300	0.300
DL-Methionine	%	0.160	0.160	——	——	——	——
Corn starch	%	10.000	8.700	6.800	6.000	49.070	49.780
Maltodextrin	%	8.000	8.000	8.000	8.000	8.000	8.000
Sucrose	%	33.130	33.130	24.400	24.400	7.000	7.000
Fructose	%	——	——	6.500	6.500	——	——
Cellulose powder	%	5.900	5.000	5.000	5.000	5.000	5.000
Vitamin premix	%	1.000	1.000	1.000	1.000	1.000	1.000
Mineral premix + additions 2)	%	3.500	3.500	4.300	4.000	4.300	4.300
Choline Cl (50 %)	%	0.250	0.250	0.290	0.290	0.290	0.290
L-Carnitine	%	——	——	0.050	0.050	0.050	0.050
Cholesterol	%	0.150	0.150	0.150	0.150	——	——
Soybean oil	%	21.700	20.300	——	——	——	——
Butylated hydroxytoluene	%	0.010	0.010	0.010	0.010	0.010	0.010
Butter fat, dehydrated	%	——	——	18.900	18.800	3.040	2.740
Corn oil	%	——	——	1.200	1.000	1.960	1.760
Linseed oil	%	——	——	0.100	0.100	0.300	0.270
Proximate contents
Crude protein	%	14.2	14.2	15.7	15.7	14.2	14.2
Crude fat	%	21.8	21.8	21.9	21.9	6.2	6.3
Crude fibre	%	5.9	5.0	5.0	5.0	5.0	5.0
Crude ash	%	3.1	4.6	4.7	5.4	4.6	5.4
Starch	%	9.6	8.4	6.6	5.8	47.2	47.8
Dextrin	%	7.9	7.9	7.9	7.9	7.9	7.9
Sugar (total)	%	34.0	34.0	34.0	33.9	9.8	8.0
Energy (Atwater)	MJ/kg	19.4	19.4	19.3	19.2	15.8	15.7
kcal% Protein		12	12	14	14	15	15
kcal% Fat		42	43	43	43	15	15
kcal% Carbohydrates		46	45	43	43	70	70
