# Supplementary material for: Microbial Activation of the GLP-2R Mitigates Gastrointestinal Inflammation
Source: Research Square preprint supplement (doi:10.21203/rs.3.rs-6973437/v1), 2025-07-09
Supplement: Supplementary file 9 [file c5e751945133d81238450a89.xlsx]

## Sheet: README
THIS SHEET CONTAINS METADATA FOR MOUSE STUDIES RELATED TO GLP-1R WT AND KO MICE IN 5-FU CHALLENGE

## Sheet: Body parameters
Cage_ID	Mouse_ID	Sex	Genotype	Group	DPI-8 or -7	DPI-1 or 0	DPI01	DPI02	DPI03	DPI04
1	874	F	-/-	Reference-Saline	19.4	19.3	18.9	18.7	18.5	19.6
1	846	F	+/+	Reference-Saline	22	23.2	22.7	21.8	21.7	23.7
1	888	F	+/+	Reference-Saline	21.3	20.1	20	19.6	19.4	20.1
2	844	F	-/-	Reference-5FU	22.4	21.9	21	20.4	19.3	18.5
2	886	F	-/-	Reference-5FU	21	20.7	20.1	19.2	18.5	18.1
2	836	F	+/+	Reference-5FU	25.6	24.4	24.4	23.6	22.4	22.4
2	870	F	+/+	Reference-5FU	24.1	23.8	24.3	22.9	22	22.4
3	838	F	-/-	McB-Saline	22.9	22.8	22.8	23	22.8	22.5
3	852	F	+/+	McB-Saline	22.8	21.9	22	22	22	22.2
3	872	F	+/+	McB-Saline	25	24.9	24.3	24.3	24.1	24.6
4	848	F	-/-	McB-5FU	23.2	22.3	22	21.4	20.1	18.9
4	862	F	-/-	McB-5FU	22.8	22	21.9	20.9	19.4	19.4
4	842	F	+/+	McB-5FU	21.1	21.7	21.7	21	20.2	20.4
4	858	F	+/+	McB-5FU	18.8	19.6	18.8	18.2	17.4	17.5
4	866	F	+/+	McB-5FU	23.6	23.6	23	22.8	22.7	22.8
5	890	F	-/-	Reference-Saline	24.6	22	21.2	21.3	21	21.6
5	896	F	+/+	Reference-Saline	20.9	20.2	19.6	20.2	20.5	21.3
6	900	F	-/-	Reference-5FU	21.1	20.8	20.4	19.5	18.6	18.1
6	904	F	+/+	Reference-5FU	23.5	22.2	22.1	21.5	20.3	20.4
6	906	F	+/+	Reference-5FU	23.4	22.1	22.3	21.9	20.7	20.5
7	910	F	+/+	McB-5FU	20.9	21.7	20.8	20	19.6	20.5
7	914	F	+/+	McB-5FU	22.2	22.2	21.3	20.8	20.3	20.8
7	916	F	-/-	McB-5FU	21.3	22.1	20.2	20.1	19.1	19.3
8	918	F	+/+	McB-Saline	22.4	23.3	23.3	23	23.4	24.3
8	920	F	-/-	McB-Saline	21	21.3	22.2	22.1	21.8	21.8
8	922	F	+/+	McB-Saline	18.7	19.8	19.8	19.2	19.3	19.8
9	926	F	-/-	McB-5FU	22.4	22.5	21.7	20.7	19.3	20.2
9	940	F	+/+	McB-5FU	25.9	25.4	25.4	24	23.2	23.8
10	936	F	+/+	Reference-5FU	22.6	21.6	20.5	20.4	20.2	20
10	948	F	-/-	Reference-5FU	22.8	22.3	22.3	20.8	20	20
11	928	F	-/-	McB-Saline	22.7	21.8	22.2	22.6	23.1	23.2
11	942	F	+/+	McB-Saline	24.9	25.7	26.4	26.7	25.8	26.5
11	966	F	+/+	McB-Saline	23.2	23.6	23.3	23.4	23.3	24
12	934	F	-/-	Reference-Saline	22.1	21.6	21.5	21.4	21.2	22
12	950	F	+/+	Reference-Saline	18.2	18.7	17.9	18	18	18.6
12	956	F	+/+	Reference-Saline	20.2	19.8	19.7	19.8	19.2	19.9
13	968	F	+/+	McB-5FU	18.7	19.5	18.7	18.4	18.2	18.2
13	976	F	+/+	McB-5FU	20	19.6	19	18.5	17.7	18
13	980	F	+/+	McB-5FU	23.3	22.4	21.8	21.1	20.9	21.7
13	982	F	-/-	McB-5FU	24	24.3	23.6	22.3	21.2	22.1
14	978	F	+/+	Reference-5FU	22.3	21.6	21.6	20.7	20.6	20.6
14	984	F	+/+	Reference-5FU	22	20.8	20.4	20.4	19.7	19.6
14	986	F	+/+	Reference-5FU	22	21.6	20.9	19.9	16.6	19.5
14	988	F	-/-	Reference-5FU	19.5	22.2	22.2	20.9	20.6	19.9
15	124	F	-/-	McB-5FU	18.9	19	17.7	17.5	16.9	16.8
17	82	F	-/-	McB-Saline	21.5	21.3	21.7	21.8	21.2	21.4
17	84	F	-/-	McB-Saline	20.7	20.4	20.6	20.6	20.7	21
17	86	F	+/+	McB-Saline	21.2	21.2	20.6	20.7	21.5	21.7
17	88	F	-/-	McB-Saline	22.9	22.7	22.8	22.7	22.6	22
17	110	F	+/+	McB-Saline	21	21.2	21.3	21.3	21.1	21.3
18	72	F	-/-	Reference-Saline	23.1	22.6	23.7	23.5	23.1	23.6
18	54	F	+/+	Reference-Saline	23	23.1	22.8	22.8	21.8	22.2
18	106	F	-/-	Reference-Saline	19.9	19.5	19.5	19.6	20	20.4
18	68	F	-/-	Reference-Saline	22.4	22.4	22.2	22.3	22	22.9
18	70	F	+/+	Reference-Saline	23.2	21.1	21.4	21.5	22.1	21.8

## Sheet: Weight gain
Cage_ID	Mouse_ID	Sex	Genotype	Group	DPI0	DPI01	DPI02	DPI03	DPI04
1	874	F	-/-	Reference-Saline	0	-0.4	-0.6	-0.8	0.3
1	846	F	+/+	Reference-Saline	0	-0.5	-1.4	-1.5	0.5
1	888	F	+/+	Reference-Saline	0	-0.1	-0.5	-0.7	0
2	844	F	-/-	Reference-5FU	0	-0.9	-1.5	-2.6	-3.4
2	886	F	-/-	Reference-5FU	0	-0.6	-1.5	-2.2	-2.6
2	836	F	+/+	Reference-5FU	0	0	-0.8	-2	-2
2	870	F	+/+	Reference-5FU	0	0.5	-0.9	-1.8	-1.4
3	838	F	-/-	McB-Saline	0	0	0.2	0	-0.3
3	852	F	+/+	McB-Saline	0	0.1	0.1	0.1	0.3
3	872	F	+/+	McB-Saline	0	-0.6	-0.6	-0.8	-0.3
4	848	F	-/-	McB-5FU	0	-0.3	-0.9	-2.2	-3.4
4	862	F	-/-	McB-5FU	0	-0.1	-1.1	-2.6	-2.6
4	842	F	+/+	McB-5FU	0	0	-0.7	-1.5	-1.3
4	858	F	+/+	McB-5FU	0	-0.8	-1.4	-2.2	-2.1
4	866	F	+/+	McB-5FU	0	-0.6	-0.8	-0.9	-0.8
5	890	F	-/-	Reference-Saline	0	-0.8	-0.7	-1	-0.4
5	896	F	+/+	Reference-Saline	0	-0.6	0	0.3	1.1
6	900	F	-/-	Reference-5FU	0	-0.4	-1.3	-2.2	-2.7
6	904	F	+/+	Reference-5FU	0	-0.1	-0.7	-1.9	-1.8
6	906	F	+/+	Reference-5FU	0	0.2	-0.2	-1.4	-1.6
7	910	F	+/+	McB-5FU	0	-0.9	-1.7	-2.1	-1.2
7	914	F	+/+	McB-5FU	0	-0.9	-1.4	-1.9	-1.4
7	916	F	-/-	McB-5FU	0	-1.9	-2	-3	-2.8
8	918	F	+/+	McB-Saline	0	0	-0.3	0.1	1
8	920	F	-/-	McB-Saline	0	0.9	0.8	0.5	0.5
8	922	F	+/+	McB-Saline	0	0	-0.6	-0.5	0
9	926	F	-/-	McB-5FU	0	-0.8	-1.8	-3.2	-2.3
9	940	F	+/+	McB-5FU	0	0	-1.4	-2.2	-1.6
10	936	F	+/+	Reference-5FU	0	-1.1	-1.2	-1.4	-1.6
10	948	F	-/-	Reference-5FU	0	0	-1.5	-2.3	-2.3
11	928	F	-/-	McB-Saline	0	0.4	0.8	1.3	1.4
11	942	F	+/+	McB-Saline	0	0.7	1	0.1	0.8
11	966	F	+/+	McB-Saline	0	-0.3	-0.2	-0.3	0.4
12	934	F	-/-	Reference-Saline	0	-0.1	-0.2	-0.4	0.4
12	950	F	+/+	Reference-Saline	0	-0.8	-0.7	-0.7	-0.1
12	956	F	+/+	Reference-Saline	0	-0.1	0	-0.6	0.1
13	968	F	+/+	McB-5FU	0	-0.8	-1.1	-1.3	-1.3
13	976	F	+/+	McB-5FU	0	-0.6	-1.1	-1.9	-1.6
13	980	F	+/+	McB-5FU	0	-0.6	-1.3	-1.5	-0.7
13	982	F	-/-	McB-5FU	0	-0.7	-2	-3.1	-2.2
14	978	F	+/+	Reference-5FU	0	0	-0.9	-1	-1
14	984	F	+/+	Reference-5FU	0	-0.4	-0.4	-1.1	-1.2
14	986	F	+/+	Reference-5FU	0	-0.7	-1.7	-5	-2.1
14	988	F	-/-	Reference-5FU	0	0	-1.3	-1.6	-2.3
15	124	F	-/-	McB-5FU	0	-1.3	-1.5	-2.1	-2.2
17	82	F	-/-	McB-Saline	0	0.4	0.5	-0.1	0.1
17	84	F	-/-	McB-Saline	0	0.2	0.2	0.3	0.6
17	86	F	+/+	McB-Saline	0	-0.6	-0.5	0.3	0.5
17	88	F	-/-	McB-Saline	0	0.1	0	-0.1	-0.7
17	110	F	+/+	McB-Saline	0	0.1	0.1	-0.1	0.1
18	72	F	-/-	Reference-Saline	0	1.1	0.9	0.5	1
18	54	F	+/+	Reference-Saline	0	-0.3	-0.3	-1.3	-0.9
18	106	F	-/-	Reference-Saline	0	0	0.1	0.5	0.9
18	68	F	-/-	Reference-Saline	0	-0.2	-0.1	-0.4	0.5
18	70	F	+/+	Reference-Saline	0	0.3	0.4	1	0.7

## Sheet: WeightPct
Cage_ID	Mouse_ID	Sex	Genotype	Group	DPI0	DPI01	DPI02	DPI03	DPI04
1	874	F	-/-	Reference-Saline	0	-2.07254	-3.10881	-4.14508	1.5544
1	846	F	+/+	Reference-Saline	0	-2.15517	-6.03448	-6.46552	2.15517
1	888	F	+/+	Reference-Saline	0	-0.497512	-2.48756	-3.48259	0
2	844	F	-/-	Reference-5FU	0	-4.10959	-6.84932	-11.8721	-15.5251
2	886	F	-/-	Reference-5FU	0	-2.89855	-7.24638	-10.628	-12.5604
2	836	F	+/+	Reference-5FU	0	0	-3.27869	-8.19672	-8.19672
2	870	F	+/+	Reference-5FU	0	2.10084	-3.78151	-7.56303	-5.88235
3	838	F	-/-	McB-Saline	0	0	0.877193	0	-1.31579
3	852	F	+/+	McB-Saline	0	0.456621	0.456621	0.456621	1.36986
3	872	F	+/+	McB-Saline	0	-2.40964	-2.40964	-3.21285	-1.20482
4	848	F	-/-	McB-5FU	0	-1.34529	-4.03587	-9.86547	-15.2466
4	862	F	-/-	McB-5FU	0	-0.454545	-5	-11.8182	-11.8182
4	842	F	+/+	McB-5FU	0	0	-3.22581	-6.91244	-5.99078
4	858	F	+/+	McB-5FU	0	-4.08163	-7.14286	-11.2245	-10.7143
4	866	F	+/+	McB-5FU	0	-2.54237	-3.38983	-3.81356	-3.38983
5	890	F	-/-	Reference-Saline	0	-3.63636	-3.18182	-4.54545	-1.81818
5	896	F	+/+	Reference-Saline	0	-2.9703	0	1.48515	5.44554
6	900	F	-/-	Reference-5FU	0	-1.92308	-6.25	-10.5769	-12.9808
6	904	F	+/+	Reference-5FU	0	-0.45045	-3.15315	-8.55856	-8.10811
6	906	F	+/+	Reference-5FU	0	0.904977	-0.904977	-6.33484	-7.23982
7	910	F	+/+	McB-5FU	0	-4.14747	-7.8341	-9.67742	-5.52995
7	914	F	+/+	McB-5FU	0	-4.05405	-6.30631	-8.55856	-6.30631
7	916	F	-/-	McB-5FU	0	-8.59729	-9.04977	-13.5747	-12.6697
8	918	F	+/+	McB-Saline	0	0	-1.28755	0.429185	4.29185
8	920	F	-/-	McB-Saline	0	4.22535	3.75587	2.34742	2.34742
8	922	F	+/+	McB-Saline	0	0	-3.0303	-2.52525	0
9	926	F	-/-	McB-5FU	0	-3.55556	-8	-14.2222	-10.2222
9	940	F	+/+	McB-5FU	0	0	-5.51181	-8.66142	-6.29921
10	936	F	+/+	Reference-5FU	0	-5.09259	-5.55556	-6.48148	-7.40741
10	948	F	-/-	Reference-5FU	0	0	-6.72646	-10.3139	-10.3139
11	928	F	-/-	McB-Saline	0	1.83486	3.66972	5.9633	6.42202
11	942	F	+/+	McB-Saline	0	2.72374	3.89105	0.389105	3.11284
11	966	F	+/+	McB-Saline	0	-1.27119	-0.847458	-1.27119	1.69492
12	934	F	-/-	Reference-Saline	0	-0.462963	-0.925926	-1.85185	1.85185
12	950	F	+/+	Reference-Saline	0	-4.27807	-3.74332	-3.74332	-0.534759
12	956	F	+/+	Reference-Saline	0	-0.505051	0	-3.0303	0.505051
13	968	F	+/+	McB-5FU	0	-4.10256	-5.64103	-6.66667	-6.66667
13	976	F	+/+	McB-5FU	0	-3.06122	-5.61224	-9.69388	-8.16327
13	980	F	+/+	McB-5FU	0	-2.67857	-5.80357	-6.69643	-3.125
13	982	F	-/-	McB-5FU	0	-2.88066	-8.23045	-12.7572	-9.0535
14	978	F	+/+	Reference-5FU	0	0	-4.16667	-4.62963	-4.62963
14	984	F	+/+	Reference-5FU	0	-1.92308	-1.92308	-5.28846	-5.76923
14	986	F	+/+	Reference-5FU	0	-3.24074	-7.87037	-23.1481	-9.72222
14	988	F	-/-	Reference-5FU	0	0	-5.85586	-7.20721	-10.3604
15	124	F	-/-	McB-5FU	0	-6.84211	-7.89474	-11.0526	-11.5789
17	82	F	-/-	McB-Saline	0	1.87793	2.34742	-0.469484	0.469484
17	84	F	-/-	McB-Saline	0	0.980392	0.980392	1.47059	2.94118
17	86	F	+/+	McB-Saline	0	-2.83019	-2.35849	1.41509	2.35849
17	88	F	-/-	McB-Saline	0	0.440529	0	-0.440529	-3.0837
17	110	F	+/+	McB-Saline	0	0.471698	0.471698	-0.471698	0.471698
18	72	F	-/-	Reference-Saline	0	4.86726	3.9823	2.21239	4.42478
18	54	F	+/+	Reference-Saline	0	-1.2987	-1.2987	-5.62771	-3.8961
18	106	F	-/-	Reference-Saline	0	0	0.512821	2.5641	4.61538
18	68	F	-/-	Reference-Saline	0	-0.892857	-0.446429	-1.78571	2.23214
18	70	F	+/+	Reference-Saline	0	1.4218	1.89573	4.73934	3.31754

## Sheet: Necropsy
Cage_ID	Mouse_ID	Sex	Genotype	Group	Spleen	Liver	Cecum	Small Intestine	Colon	Colon length	Colon length w/o carnoy	SpleenToBW	LiverToBW	CecumToBW	SmallToBW	ColonToBW	ColonIndex
1	874	F	-/-	Reference-Saline	0.085	1.114	0.237	0.796	0.094	5.5	5	0.433673	5.68367	1.20918	4.06122	0.479592	18.8
1	846	F	+/+	Reference-Saline	0.073	1.41	0.295	0.859	0.108	6.5	5.8	0.308017	5.94937	1.24473	3.62447	0.455696	18.6207
1	888	F	+/+	Reference-Saline	0.065	0.95	0.203	0.76	0.088	6.2	5.7	0.323383	4.72637	1.00995	3.78109	0.437811	15.4386
2	844	F	-/-	Reference-5FU	0.045	0.87	0.121	0.625	0.124	5.5	4.9	0.243243	4.7027	0.654054	3.37838	0.67027	25.3061
2	886	F	-/-	Reference-5FU	0.035	0.939	0.205	0.68	0.124	5.5	5	0.19337	5.18785	1.1326	3.75691	0.685083	24.8
2	836	F	+/+	Reference-5FU	0.054	1.06	0.159	0.701	0.118	5.8	5	0.241071	4.73214	0.709821	3.12946	0.526786	23.6
2	870	F	+/+	Reference-5FU	0.049	1.067	0.277	0.728	0.13	7.5	6.6	0.21875	4.76339	1.23661	3.25	0.580357	19.697
3	838	F	-/-	McB-Saline	0.113	1.147	0.281	0.867	0.101	6.4	5.5	0.502222	5.09778	1.24889	3.85333	0.448889	18.3636
3	852	F	+/+	McB-Saline	0.09	1.041	0.316	0.908	0.098	6.4	5.5	0.405405	4.68919	1.42342	4.09009	0.441441	17.8182
3	872	F	+/+	McB-Saline	0.102	1.188	0.381	0.98	0.113	7.5	6.5	0.414634	4.82927	1.54878	3.98374	0.45935	17.3846
4	848	F	-/-	McB-5FU	0.05	0.924	0.174	0.827	0.138	5.9	5.1	0.26455	4.88889	0.920635	4.37566	0.730159	27.0588
4	862	F	-/-	McB-5FU	0.06	1.05	0.142	0.829	0.145	6.1	5.4	0.309278	5.41237	0.731959	4.2732	0.747423	26.8519
4	842	F	+/+	McB-5FU	0.048	0.95	0.259	0.734	0.118	6.9	5.9	0.235294	4.65686	1.26961	3.59804	0.578431	20
4	858	F	+/+	McB-5FU	0.039	0.803	0.273	0.76	0.107	7	6.1	0.222857	4.58857	1.56	4.34286	0.611429	17.541
4	866	F	+/+	McB-5FU	0.038	1.232	0.268	0.983	0.115	8.5	7.6	0.166667	5.40351	1.17544	4.3114	0.504386	15.1316
5	890	F	-/-	Reference-Saline	0.089	1.032	0.26	0.783	0.113	6.1	5.2	0.412037	4.77778	1.2037	3.625	0.523148	21.7308
5	896	F	+/+	Reference-Saline	0.09	1.05	0.31	0.944	0.088	6.6	5.7	0.422535	4.92958	1.4554	4.43192	0.413146	15.4386
6	900	F	-/-	Reference-5FU	0.043	0.833	0.165	0.685	0.13	5.6	4.8	0.237569	4.60221	0.911602	3.78453	0.718232	27.0833
6	904	F	+/+	Reference-5FU	0.041	0.934	0.162	0.874	0.131	6.5	5.6	0.20098	4.57843	0.794118	4.28431	0.642157	23.3929
6	906	F	+/+	Reference-5FU	0.039	0.973	0.139	0.785	0.132	6.6	5.8	0.190244	4.74634	0.678049	3.82927	0.643902	22.7586
7	910	F	+/+	McB-5FU	0.046	1.046	0.329	1	0.144	7	6	0.22439	5.10244	1.60488	4.87805	0.702439	24
7	914	F	+/+	McB-5FU	0.051	1.076	0.303	0.989	0.112	7.2	6.3	0.245192	5.17308	1.45673	4.75481	0.538462	17.7778
7	916	F	-/-	McB-5FU	0.044	0.975	0.146	0.882	0.164	6	5	0.227979	5.05181	0.756477	4.56995	0.849741	32.8
8	918	F	+/+	McB-Saline	0.108	1.227	0.362	1.152	0.116	6.8	6	0.444444	5.04938	1.48971	4.74074	0.477366	19.3333
8	920	F	-/-	McB-Saline	0.106	1.038	0.274	1.342	0.127	7	6.4	0.486239	4.76147	1.25688	6.15596	0.582569	19.8438
8	922	F	+/+	McB-Saline	0.081	0.997	0.277	1.106	0.116	7.1	6.2	0.409091	5.03535	1.39899	5.58586	0.585859	18.7097
9	926	F	-/-	McB-5FU	0.037	1.018	0.391	0.801	0.113	6.3	5.3	0.183168	5.0396	1.93564	3.96535	0.559406	21.3208
9	940	F	+/+	McB-5FU	0.066	1.228	0.279	1.299	0.126	6.8	5.5	0.277311	5.15966	1.17227	5.45798	0.529412	22.9091
10	936	F	+/+	Reference-5FU	0.033	1.013	0.207	0.63	0.158	6.4	5.3	0.165	5.065	1.035	3.15	0.79	29.8113
10	948	F	-/-	Reference-5FU	0.051	1.012	0.197	0.743	0.157	5.6	4.3	0.255	5.06	0.985	3.715	0.785	36.5116
11	928	F	-/-	McB-Saline	0.089	1.229	0.41	1.016	0.12	6.9	6	0.383621	5.29741	1.76724	4.37931	0.517241	20
11	942	F	+/+	McB-Saline	0.118	1.36	0.453	1.214	0.11	6.9	6	0.445283	5.13208	1.70943	4.58113	0.415094	18.3333
11	966	F	+/+	McB-Saline	0.105	1.043		1.23	0.1	5.3	4.5	0.4375	4.34583	0	5.125	0.416667	22.2222
12	934	F	-/-	Reference-Saline	0.08	1.017	0.268	0.95	0.113	6.4	5.5	0.363636	4.62273	1.21818	4.31818	0.513636	20.5455
12	950	F	+/+	Reference-Saline	0.071	0.782	0.237	0.815	0.08	5.7	4.6	0.38172	4.2043	1.27419	4.38172	0.430108	17.3913
12	956	F	+/+	Reference-Saline	0.078	0.96	0.292	0.859	0.09	6	5.1	0.39196	4.82412	1.46734	4.31658	0.452261	17.6471
13	968	F	+/+	McB-5FU	0.054	0.669	0.275	0.845	0.108	7.6	6.6	0.296703	3.67582	1.51099	4.64286	0.593407	16.3636
13	976	F	+/+	McB-5FU	0.041	0.644	0.255	0.827	0.094	7.3	6.5	0.227778	3.57778	1.41667	4.59444	0.522222	14.4615
13	980	F	+/+	McB-5FU	0.058	1.207	0.31	0.941	0.128	6.5	5.4	0.267281	5.56221	1.42857	4.33641	0.589862	23.7037
13	982	F	-/-	McB-5FU	0.055	1.217	0.274	0.874	0.159	6	5	0.248869	5.50679	1.23982	3.95475	0.719457	31.8
14	978	F	+/+	Reference-5FU	0.049	1.032	0.215	0.626	0.11	5.7	5	0.237864	5.00971	1.04369	3.03883	0.533981	22
14	984	F	+/+	Reference-5FU	0.039	0.968	0.171	0.701	0.114	5.8	4.6	0.19898	4.93878	0.872449	3.57653	0.581633	24.7826
14	986	F	+/+	Reference-5FU	0.044	0.945	0.164	0.618	0.127	5.8	4.6	0.225641	4.84615	0.841026	3.16923	0.651282	27.6087
14	988	F	-/-	Reference-5FU	0.046	0.932	0.217	0.738	0.153	5.5	4.4	0.231156	4.68342	1.09045	3.70854	0.768844	34.7727
15	124	F	-/-	McB-5FU	0.036	0.951	0.245		0.162	5.1	4.6	0.214286	5.66071	1.45833	0	0.964286	35.2174
17	82	F	-/-	McB-Saline	0.092	1.173	0.291	1.165	0.141	5.3	4.8	0.429907	5.48131	1.35981	5.44393	0.658879	29.375
17	84	F	-/-	McB-Saline	0.102	1.02	0.32	1.111	0.139	5.6	4.7	0.485714	4.85714	1.52381	5.29048	0.661905	29.5745
17	86	F	+/+	McB-Saline	0.106	1.152	0.34	1.171	0.153	5.5	5	0.488479	5.30876	1.56682	5.39631	0.705069	30.6
17	88	F	-/-	McB-Saline	0.094	1.179	0.315	1.0301		6	5.5	0.427273	5.35909	1.43182	4.68227	0
17	110	F	+/+	McB-Saline	0.09	1.058	0.263	1.121		6.5	5.9	0.422535	4.96714	1.23474	5.26291	0
18	72	F	-/-	Reference-Saline	0.072	0.982	0.284	0.985		5.8	5.1	0.305085	4.16102	1.20339	4.17373	0
18	54	F	+/+	Reference-Saline	0.083	1.102	0.309	0.834	0.159	6.5	6	0.373874	4.96396	1.39189	3.75676	0.716216	26.5
18	106	F	-/-	Reference-Saline	0.073	1.018	0.176	0.915	0.118	5.2	4.7	0.357843	4.9902	0.862745	4.48529	0.578431	25.1064
18	68	F	-/-	Reference-Saline	0.093	1.132	0.24	0.917	0.151	6.3	5.6	0.406114	4.94323	1.04803	4.00437	0.659389	26.9643
18	70	F	+/+	Reference-Saline	0.08	1.001	0.261	0.833	0.125	5.2	4.7	0.366972	4.59174	1.19725	3.8211	0.573394	26.5957

## Sheet: Biomarker
Cage_ID	Mouse_ID	Sex	Genotype	Group	MPO_Jejunum	MPO_Ileum
1	874	F	-/-	Reference-Saline	1.21941	1.9501
1	846	F	+/+	Reference-Saline	0.155114	0.574543
1	888	F	+/+	Reference-Saline	2.76464	1.51128
2	844	F	-/-	Reference-5FU	5.20841	3.55743
2	886	F	-/-	Reference-5FU	6.28444	4.36892
2	836	F	+/+	Reference-5FU	6.40504	6.10022
2	870	F	+/+	Reference-5FU	7.41044	4.92176
3	838	F	-/-	McB-Saline	2.19327	1.2506
3	852	F	+/+	McB-Saline	2.88584	1.41957
3	872	F	+/+	McB-Saline	1.48935	2.19973
4	848	F	-/-	McB-5FU	5.09335	2.81845
4	862	F	-/-	McB-5FU	3.85253	3.02318
4	842	F	+/+	McB-5FU	0.974335	1.33339
4	858	F	+/+	McB-5FU	2.5005	1.88861
4	866	F	+/+	McB-5FU	3.49086	3.25311
5	890	F	-/-	Reference-Saline	2.94958	1.55503
5	896	F	+/+	Reference-Saline	1.30016	1.0305
6	900	F	-/-	Reference-5FU	11.1659	9.19237
6	904	F	+/+	Reference-5FU	14.8864	11.6969
6	906	F	+/+	Reference-5FU	13.2369	8.82951
7	910	F	+/+	McB-5FU	2.07919	3.28081
7	914	F	+/+	McB-5FU	1.70397	4.12693
7	916	F	-/-	McB-5FU	4.1065	6.32999
8	918	F	+/+	McB-Saline	4.06696	6.43668
8	920	F	-/-	McB-Saline	1.92564	3.65276
8	922	F	+/+	McB-Saline	3.53046	3.78191
9	926	F	-/-	McB-5FU	4.8898	4.77987
9	940	F	+/+	McB-5FU	6.35304	7.92358
10	936	F	+/+	Reference-5FU	8.0355	7.39984
10	948	F	-/-	Reference-5FU	11.9145	16.9452
11	928	F	-/-	McB-Saline	3.10067	6.71163
11	942	F	+/+	McB-Saline	2.62126	6.49583
11	966	F	+/+	McB-Saline	5.10242	7.72742
12	934	F	-/-	Reference-Saline	3.51057	2.6601
12	950	F	+/+	Reference-Saline	4.98119	5.07677
12	956	F	+/+	Reference-Saline	3.89336	5.44206
13	968	F	+/+	McB-5FU	18.0122	18.5512
13	976	F	+/+	McB-5FU	10.7102	13.979
13	980	F	+/+	McB-5FU	5.56388	10.5348
13	982	F	-/-	McB-5FU	7.67605	7.63942
14	978	F	+/+	Reference-5FU	14.3021	14
14	984	F	+/+	Reference-5FU	17.3656	19.254
14	986	F	+/+	Reference-5FU	24.7536	19.9809
14	988	F	-/-	Reference-5FU	17.968	14.4181
15	124	F	-/-	McB-5FU	4.18783	4.94479
17	82	F	-/-	McB-Saline	1.70512	1.96107
17	84	F	-/-	McB-Saline	1.77374	1.72401
17	86	F	+/+	McB-Saline	2.10845	5.85972
17	88	F	-/-	McB-Saline	2.89502	1.78861
17	110	F	+/+	McB-Saline	2.52496	3.96414
18	72	F	-/-	Reference-Saline	2.64438	4.3313
18	54	F	+/+	Reference-Saline	0.595334	3.10676
18	106	F	-/-	Reference-Saline	2.62743	4.08633
18	68	F	-/-	Reference-Saline	1.5556	0.745489
18	70	F	+/+	Reference-Saline	2.02782	2.19834

## Sheet: Day0vs4
Cage_ID	Mouse_ID	Sex	Genotype	Group	Absolute	Percent
1	874	F	-/-	Reference-Saline	0.3	1.5544
1	846	F	+/+	Reference-Saline	0.5	2.15517
1	888	F	+/+	Reference-Saline	0	0
2	844	F	-/-	Reference-5FU	-3.4	-15.5251
2	886	F	-/-	Reference-5FU	-2.6	-12.5604
2	836	F	+/+	Reference-5FU	-2	-8.19672
2	870	F	+/+	Reference-5FU	-1.4	-5.88235
3	838	F	-/-	McB-Saline	-0.3	-1.31579
3	852	F	+/+	McB-Saline	0.3	1.36986
3	872	F	+/+	McB-Saline	-0.3	-1.20482
4	848	F	-/-	McB-5FU	-3.4	-15.2466
4	862	F	-/-	McB-5FU	-2.6	-11.8182
4	842	F	+/+	McB-5FU	-1.3	-5.99078
4	858	F	+/+	McB-5FU	-2.1	-10.7143
4	866	F	+/+	McB-5FU	-0.8	-3.38983
5	890	F	-/-	Reference-Saline	-0.4	-1.81818
5	896	F	+/+	Reference-Saline	1.1	5.44554
6	900	F	-/-	Reference-5FU	-2.7	-12.9808
6	904	F	+/+	Reference-5FU	-1.8	-8.10811
6	906	F	+/+	Reference-5FU	-1.6	-7.23982
7	910	F	+/+	McB-5FU	-1.2	-5.52995
7	914	F	+/+	McB-5FU	-1.4	-6.30631
7	916	F	-/-	McB-5FU	-2.8	-12.6697
8	918	F	+/+	McB-Saline	1	4.29185
8	920	F	-/-	McB-Saline	0.5	2.34742
8	922	F	+/+	McB-Saline	0	0
9	926	F	-/-	McB-5FU	-2.3	-10.2222
9	940	F	+/+	McB-5FU	-1.6	-6.29921
10	936	F	+/+	Reference-5FU	-1.6	-7.40741
10	948	F	-/-	Reference-5FU	-2.3	-10.3139
11	928	F	-/-	McB-Saline	1.4	6.42202
11	942	F	+/+	McB-Saline	0.8	3.11284
11	966	F	+/+	McB-Saline	0.4	1.69492
12	934	F	-/-	Reference-Saline	0.4	1.85185
12	950	F	+/+	Reference-Saline	-0.1	-0.534759
12	956	F	+/+	Reference-Saline	0.1	0.505051
13	968	F	+/+	McB-5FU	-1.3	-6.66667
13	976	F	+/+	McB-5FU	-1.6	-8.16327
13	980	F	+/+	McB-5FU	-0.7	-3.125
13	982	F	-/-	McB-5FU	-2.2	-9.0535
14	978	F	+/+	Reference-5FU	-1	-4.62963
14	984	F	+/+	Reference-5FU	-1.2	-5.76923
14	986	F	+/+	Reference-5FU	-2.1	-9.72222
14	988	F	-/-	Reference-5FU	-2.3	-10.3604
15	124	F	-/-	McB-5FU	-2.2	-11.5789
17	82	F	-/-	McB-Saline	0.1	0.469484
17	84	F	-/-	McB-Saline	0.6	2.94118
17	86	F	+/+	McB-Saline	0.5	2.35849
17	88	F	-/-	McB-Saline	-0.7	-3.0837
17	110	F	+/+	McB-Saline	0.1	0.471698
18	72	F	-/-	Reference-Saline	1	4.42478
18	54	F	+/+	Reference-Saline	-0.9	-3.8961
18	106	F	-/-	Reference-Saline	0.9	4.61538
18	68	F	-/-	Reference-Saline	0.5	2.23214
18	70	F	+/+	Reference-Saline	0.7	3.31754

## Sheet: Histology
Cage_ID	Mouse_ID	Sex	Genotype	Group	Duodenum - Villus height	Duodenum - Crypt depth	Jejunum - Villus height	Jejunum - Crypt depth	Ileum - Villus height	Ileum - Crypt depth	Prox. Colon - Crypt depth	Prox. Colon - Mucus area	Prox. Colon - Mucus:crypt	Distal Colon - Crypt depth	Distal Colon - Mucus area	Distal Colon - Mucus:crypt
1	874	F	-/-	Reference-Saline	582.77	102.097	318.048	105.189	280.85	100.546	178.34
1	846	F	+/+	Reference-Saline	523.383	118.756	353.958	96.2477	260.039	102.397	160.453
1	888	F	+/+	Reference-Saline	550.807	86.0523	340.187	90.6083	236.696	92.5683	147.527
2	844	F	-/-	Reference-5FU	384.879	96.79	276.212	97.9833	195.343	114.781	185.216
2	886	F	-/-	Reference-5FU	395.078	104.637	274.523	105.847	177.285	110.953	172.228
2	836	F	+/+	Reference-5FU	366.127	120.831	292.281	119.181	175.138	96.9313	168.957
2	870	F	+/+	Reference-5FU	380.799	122.243	303.612	110.329	185.713	84.997	176.46
3	838	F	-/-	McB-Saline	654.613	123.562	389.094	114.522	290.331	104.49	162.107
3	852	F	+/+	McB-Saline	606.751	124.555	464.397	122.635	263.96	121.295	134.286
3	872	F	+/+	McB-Saline	613.491	121.339	417.322	123.271	298.083	121.344	172.603
4	848	F	-/-	McB-5FU	495.128	144.371	373.533	143.53	191.709	138.558	184.535
4	862	F	-/-	McB-5FU	526.553	123.076	388.225	126.795	229.65	150.031	191.486
4	842	F	+/+	McB-5FU	475.613	130.417	289.192	124.312	238.231	120.349	177.391
4	858	F	+/+	McB-5FU	466.797	126.851	261.987	133.632	212.301	130.112	158.722
4	866	F	+/+	McB-5FU	511.274	139.476	390.417	129.859	242.726	138.3	170.324
5	890	F	-/-	Reference-Saline	522.514	106.979	366.413	109.653	263.803	88.273	153.879
5	896	F	+/+	Reference-Saline	538.27	84.144	353.31	92.117	259.817	98.0083	159.925
6	900	F	-/-	Reference-5FU	369.817	112.079	280.29	106.866	184.797	104.704
6	904	F	+/+	Reference-5FU	302.627	88.218	236.626	102.041	171.524	109.289	149.335
6	906	F	+/+	Reference-5FU	356.287	114.499	279.128	117.955	202.13	110.777	135.191
7	910	F	+/+	McB-5FU	473.782	109.614	369.057	135.013	200.391	144.648	199.744
7	914	F	+/+	McB-5FU	446.761	128.255	301.944	128.603	172.677	149.786	171.574
7	916	F	-/-	McB-5FU	449.206	125.931	357.104	122.378	264.446	171.032	167.759
8	918	F	+/+	McB-Saline	585.648	115.253	347.569	127.791	294.208	123.593	159.044
8	920	F	-/-	McB-Saline	651.444	118.955	399.371	121.986	296.782	122.585	168.725
8	922	F	+/+	McB-Saline	674.397	121.382	433.621	121.3	321.419	123.21	132.612
9	926	F	-/-	McB-5FU	382.185	135.213	331.353	151.662	282.999	131.679	185.396
9	940	F	+/+	McB-5FU	426.854	126.092	348.437	145.384	236.713	143.533	168.252
10	936	F	+/+	Reference-5FU	365.896	120.702	299.953	109.354	192.812	114.469	132.243
10	948	F	-/-	Reference-5FU	421.287	126.756	301.495	130.809	194.164	123.24	152.098
11	928	F	-/-	McB-Saline	518.159	115.953	422.686	112.151	316.46	112.404	135.877
11	942	F	+/+	McB-Saline	506.926	120.464	349.672	120.454	311.028	99.007	153.666
11	966	F	+/+	McB-Saline	607.355	115.465	411.82	138.303	296.091	178.587	159.064
12	934	F	-/-	Reference-Saline	545.352	111.874	384.533	114.352	263.083	113.942	164.062
12	950	F	+/+	Reference-Saline	459.046	101.591	392.974	105.447	261.688	111.635	170.076
12	956	F	+/+	Reference-Saline	564.506	100.841	353.993	109.878	253.644	118.019	131.127
13	968	F	+/+	McB-5FU	438.08	140.494	280.044	129.17
13	976	F	+/+	McB-5FU			344.991	132.027	238.149	147.488	172.967
13	980	F	+/+	McB-5FU	493.596		377.199	129.287	254.244	123.366	188.754
13	982	F	-/-	McB-5FU	490.088	144.186	347.165	148.355	252.099	143.78	228.176
14	978	F	+/+	Reference-5FU	388.337	129.754	358.969	121.851	188.023	119.593	179.396
14	984	F	+/+	Reference-5FU	381.265	120.69	291.352	128.008	191.424	114.522	191.171
14	986	F	+/+	Reference-5FU	385.824	114.485	316.308	127.614	183.46	119.412	214.931
14	988	F	-/-	Reference-5FU	360.977	127.508	276.299	122.74	185.071	104.547	201.141
