# Supplementary material for: Microbial Activation of the GLP-2R Mitigates Gastrointestinal Inflammation
Source: Research Square preprint supplement (doi:10.21203/rs.3.rs-6973437/v1), 2025-07-09
Supplement: Supplementary file 10 [file cf10bd03df135f81000d9c24.xlsx]

## Sheet: README
THIS FILE CONTAINS RELATIVE LAMINA PROPRIA T-CELL DATA FROM MICE FED THE COMPLEX DIET WITH OR WITHOUT MCB, INGESTING ANTIBIOTICS OR NORMAL WATER TO TEST FOR MICROBIOTA-DEPENDENT T-CELL PROFILES
CD = COMPLEX DIET + WATER
ABX-CD = COMPLEX DIET + ANTIBIOTICS
CDMCB = COMPLEX DIET WITH MCB AS PROTEIN SOURCE + WATER
ABX-CDMCB = COMPLEX DIET WITH MCB AS PROTEIN SOURCE + ANTIBIOTICS

## Sheet: 2 WEEKS
	SMALL INTESTINE
	nTregs			pTregs			Th17			IL-10+ Th17			IFNy+ Th17			Th1
	CD	CDMCB		CD	CDMCB		CD	CDMCB		CD	CDMCB		CD	CDMCB		CD	CDMCB
	7.18	7.88		4.39	11.4		32.7	52.1		0.76	1.55		6.99	2.38		13.1	6.5
	9.4	10.1		5.28	9.63		45.1	50.8		0.46	1.24		6.14	2.97		14.8	13
	7.43	11.2		5.63	8.99		20.2	39.3		0.94	1.74		7.5	3.25		18.1	6.64
	8			3.92			25			0.84			8.64			17.5
	ABX-CD	ABX-CDMCB		ABX-CD	ABX-CDMCB		ABX-CD	ABX-CDMCB		ABX-CD	ABX-CDMCB		ABX-CD	ABX-CDMCB		ABX-CD	ABX-CDMCB
	6.48	10.7		2.59	14.9		32.6	17.6		0.9	1.16		9.29	5.23		12.2	12.1
	7.98	10.8		3.64	11		21.3	16.8		0.7	1.16		8.64	5.73		9.76	20.3
	12.1	13.2		4.58	11.9		23.3	19.5		1	1.06		5.24	5.45		14.2	14.9
	12.9			4.19			24			0.84			10.2			17.6
	LARGE INTESTINE
	nTregs			pTregs			Th17			IL-10+ Th17			IFNy+ Th17			Th1
	CD	CDMCB		CD	CDMCB		CD	CDMCB		CD	CDMCB		CD	CDMCB		CD	CDMCB
	14.9	13.5		21.9	18.2		21.7	35.2		0.81	3.11		16.5	8.91		18.3	14.2
	13.9	15.4		17.3	18.3		35.3	30.6		1.03	2.63		8.35	6.63		11.8	17.1
	15.7	10.9		22.7	16.3		23.9	33.2		0.54	3.2		10.6	8.8		12.8	14.6
	17.3			18.6			23.9			0.097			11			19.8
	ABX-CD	ABX-CDMCB		ABX-CD	ABX-CDMCB		ABX-CD	ABX-CDMCB		ABX-CD	ABX-CDMCB		ABX-CD	ABX-CDMCB		ABX-CD	ABX-CDMCB
	20.7	12.2		10.7	32.5		15.3	19.5		0.78	1.34		15.2	8.22		13.4	13
	19.2	17.8		12.5	27.1		14.3	11.1		0.9	1.27		10.4	7.94		13	11.5
	27.3	17.5		13.5	31.9		14.2	21.4		0.71	0.91		9.83	6		12.8	17.2
	24.1			11.7			14.9			0.83			9.32			17.1

## Sheet: 4 WEEKS
	SMALL INTESTINE
	nTregs			pTregs			Th17			IL-10+ Th17			IFNy+ Th17			Th1
	CD	CDMCB		CD	CDMCB		CD	CDMCB		CD	CDMCB		CD	CDMCB		CD	CDMCB
	9.31	10.2		3.77	14		21.5	39.9		0.5	1.41		11.2	1.63		15.2	6.93
	7.44	10.7		4.06	14.6		20.3	35.2		1.08	1.24		6.52	5.3		10.3	4.19
	7.67	8.95		2.77	10.8		16.8	32.3		0.73	1.43		11.1	6.17		27.1	12.3
		8.71			13.1			35		0.62			16.1			22.5	15
	ABX-CD	ABX-CDMCB		ABX-CD	ABX-CDMCB		ABX-CD	ABX-CDMCB		ABX-CD	ABX-CDMCB		ABX-CD	ABX-CDMCB		ABX-CD	ABX-CDMCB
	9.19	8.2		4.29	9.2		20.2	23		1.03	0.65		5.16	6.12		6.85	7.2
	11.4	8.11		6.04	10.2		23	23.4		0.77	0.7		5.31	3.25		7.79	11.5
	9.45	8.98		5.37	14.5		22.2	28.4		0.29	0.34		8.93	7.98		17.6	20.2
	7.1			5.15			24.4			0.35	0.52		10.8	9.18		24.1
	LARGE INTESTINE
	nTregs			pTregs			Th17			IL-10+ Th17			IFNy+ Th17			Th1
	CD	CDMCB		CD	CDMCB		CD	CDMCB		CD	CDMCB		CD	CDMCB		CD	CDMCB
	12.2	13		17.5	21.9		26.2	32.6		0.9	1.39		11.5	3.96		22.7	8.33
	12.5	11		18.3	21		25.8	21.2		0.9	1.91		10.4	8.72		17.9	12.6
	16.7	11.5		22.6	9.68		19.4	9.34		0.57	1.21		14.5	11.7		17.7	6.58
	16.3	14.5		13	20.2		15.7	19.5		0.28	2.09		15.2	11.7		22.2	25.7
	ABX-CD	ABX-CDMCB		ABX-CD	ABX-CDMCB		ABX-CD	ABX-CDMCB		ABX-CD	ABX-CDMCB		ABX-CD	ABX-CDMCB		ABX-CD	ABX-CDMCB
	27.5	11.9		12.6	24		15.9	15.8		1.09	1.24		8.17	10.2		11.9	9.62
	23.4	13.7		15.1	26.5		16.9	17.3		0.89	0.11		5.15	16.8		6.61	24.8
	30.2	13.2		10.8	28.1		13.5	14.8		0.51	0.25		11.2	11.7		30	14.5
	30.2			21			14.8			0.4			15.5			33.3

## Sheet: 6 WEEKS
	SMALL INTESTINE
	nTregs			pTregs			Th17			IL-10+ Th17			IFNy+ Th17			Th1
	CD	CDMCB		CD	CDMCB		CD	CDMCB		CD	CDMCB		CD	CDMCB		CD	CDMCB
	8.53	11.3		5.55	19.7		20.2	34.3		1.17	1.99		17	5.18		32.2	15
	7.26	12.1		6.2	17.3		21.7	37.3		0.82	1.91		9.19	3.59		20.7	11.6
	9.58	10.9		4.29	12		17.6	35.8		1.13	1.92		10.4	9.28		21.2	14
		10.7			10.3			42.9			2.8			4.49			10.4
	ABX-CD	ABX-CDMCB		ABX-CD	ABX-CDMCB		ABX-CD	ABX-CDMCB		ABX-CD	ABX-CDMCB		ABX-CD	ABX-CDMCB		ABX-CD	ABX-CDMCB
	9.66	11.8		4.92	16.4		14.7	35.1		1.17	0.83		11.5	7.22		12.1	17.9
	9.76	12.3		5.21	14.8		23.2	40.8		1.03	1.07		8.57	5.11		22.8	12.8
	9.38	11.6		4.83	17.6		17.6	23.5		1.04	0.9		7.05	6.9		9.16	16.1
	LARGE INTESTINE
	nTregs			pTregs			Th17			IL-10+ Th17			IFNy+ Th17			Th1
	CD	CDMCB		CD	CDMCB		CD	CDMCB		CD	CDMCB		CD	CDMCB		CD	CDMCB
	26.8	16.2		12.5	31.6		10.6	14		0.96	2.42		14.1	11.9		15	17.6
	20.6	17		25.8	28.6		16.7	15.9		0.78	2.01		9.75	12.1		15.5	20.5
	13.7	13.9		12.5	23.8		19.1	19.7		0.71	1.94		15.1	9.63		16.6	12.1
		14.8			26.3			22.1			2.67			4.88			10.9
	ABX-CD	ABX-CDMCB		ABX-CD	ABX-CDMCB		ABX-CD	ABX-CDMCB		ABX-CD	ABX-CDMCB		ABX-CD	ABX-CDMCB		ABX-CD	ABX-CDMCB
	31.2	14.5		14.2	23.7		8.84	17.3		0.65	0.83		9.21	10.9		11.6	17.9
	20.5	16		13.2	23.8		16.3	19.7		1.15	0.74		10.4	7.37		14.1	9.77
	25	19.2		15.4	28.6		13.4	12.1		1.17	1.11		14.8	14.5		13	20.2

## Sheet: CECUM WEIGHTS
FOLD CHANGE COMPARED TO RESPECTIVE WATER CONTROL
	2 WEEKS					4 WEEKS					6 WEEKS
	CD	CDMCB	ABX-CD	ABX-CDMCB		CD	CDMCB	ABX-CD	ABX-CDMCB		CD	CDMCB	ABX-CD	ABX-CDMCB
	1.0013	0.996466	5.70013	2.28551		0.884835	0.902169	1.8016	1.82169		1.11727	1.19826	2.44716	1.46957
	0.996089	0.985866	7.08735	1.19364		0.889396	1.28386	1.45952	1.68675		0.923969	1.18957	2.32345	1.32
	1.00652	1.01767	3.2073	1.29965		1.29532	1.08145	3.33409	2.00482		0.958763	0.73913	2.47809	1.66261
	0.996089		5.50196			0.930445	0.73253	3.66705				0.873043

## Sheet: MICROBIAL LOAD
16S rRNA DNA per mg feces
		CD											CDMCB											ABX-CD											ABX-CDMCB
	WEEK #	6 weeks	6 weeks	6 weeks	4 weeks	4 weeks	4 weeks	4 weeks	2 weeks	2 weeks	2 weeks	2 weeks	6 weeks	6 weeks	6 weeks	6 weeks	4 weeks	4 weeks	4 weeks	4 weeks	2 weeks	2 weeks	2 weeks	6 weeks	6 weeks	6 weeks	4 weeks	4 weeks	4 weeks	4 weeks	2 weeks	2 weeks	2 weeks	2 weeks	6 weeks	6 weeks	6 weeks	4 weeks	4 weeks	4 weeks	4 weeks	2 weeks	2 weeks	2 weeks
	0	1.48276	2.6	1.53684	2.70312	4.72368	1.22603	3.184	1.66949	3.68	0.877551	3.73228	1.50323	2.3268	1.73395	3.33981	1.72917	1.48276	2.70161	1.48333	2.82857	4.01449	3.07692	3.02198	2.91176	1.62376	2.32778	3.02235	2.71429	1.96491	2.20588	1.77372	2.48521	3.25641	0.842391	1.28333	0.904494	1.624	1.624	3.78873	1.90909	2.70454	1.61765	2.12381
	1	0.892308	0.872611	0.987179	1.42453	0.798507	0.695652	0.236842	1.488	0.506173	0.556604	2.0303	0.816216	1.30625	1.54118	2.25	1.76119	1.7875	1.11429	1.40426	1.72549	1.83654	1.66981	0.10084	0.482759	0.183007	0.089005	0.074627	0.0625	0.097561	0	0.060976	0.022222	0.042553	1.84706	0.115152	0	0.192771	0.192771	0.067961	0.198675	0.407407	0.266234	0.321739
	2	1.05	0.916084	0.805556	0.798561	0.893204	0.888889	0.605263	0.533898	0.824742	0.786885	1.7033	1.77778	1.57065	1.36913	1.60355	1.38	0.5	1.14286	0.790323	1.95192	1.55676	2.26582	0.322222	0.211765	0.3125	0.211538	0.185185	0.147651	0.201681	0.040936	0.117117	0.107143	0.219512	0.66	0.064286	0.129032	0.150685	0.150685	0.422764	0.360825	0.648649	0.437126	0.491018
	3	1.02286	0.802326	1.14474	0.312883	1.06061	0.619718	1.21374					1.60345	2	1.79114		1.08148	0.98913	1.41667	1.2191				0.098446	0.070796	0.136364	0.352381	0.188889	0.247525	0.175824					0.477612	0.233333	0.036649	0.540984	0.540984	0.391304	0.257143
	4	0.709924	1.02752	0.633803	1.33333	1.32692	0.37931	0.8125					1.31944	1.76836	2.39167	1.93662	1.45794	0.791667	0.655405	2.36667				0.158621	0.303797	0.295652	1.50495	1.18978	1.17172	0.34					0.451282	0.161017	0.114035	1.41964	1.41964	1.99363	1.68889
	5	0.85443	0.717172	1.3169									1.43529	2.536	1.48	2.19014								0.668874	0.671429	0.361963									1.69565	1.65926	0.53886
	6	0.7	1.70701	1.30709									1.35353	2.0566	2.56429	2								0.781022	1.4569	0.992593									1.66102	1.08411	0.834286
