# Supplementary material for: Microbial Activation of the GLP-2R Mitigates Gastrointestinal Inflammation
Source: Research Square preprint supplement (doi:10.21203/rs.3.rs-6973437/v1), 2025-07-09
Supplement: Supplementary file 11 [file fa1d5772b0a3d07ebd032c1f.xlsx]

## Sheet: PERFUSION
		REFERENCE				MCB
	Time (min)	Rat 1	Rat 2	Rat 3	Rat 4	Rat 5	Rat 6	Rat 7	Rat 8
	1	24	12	89	66	34	22	49	27
	2	19	13	106	43	44	26	44	32
	3	21	14	97	37	38	25	58	30
	4	18	13	97	46	30	27	48	26
	5	22	17	83	47	29	28	48	35
	6	30	14	86	42	23	26	48	38
	7	22	17	91	36	29	34	45	42
	8	17	17	70	42	28	25	58	28
	9	26	16	76	33	29	29	61	28
	10	27	16	83	38	29	30	43	26	15 mg/mL
	11	25	17	83	32	31	32	73	29
	12	21	12	79	39	27	23	49	25
	13	24	13	62	33	28	25	46	24
	14	22	17	57	41	26	19	44	23
	15	25	21	62	37	34	31	49	26
	16	23	14	67	40	28	33	48	38
	17	24	20	68	45	32	29	53	26
	18	28	13	79	37	32	31	55	25
	19	24	15	71	34	35	32	50	27
	20	30	18	58	31	30	28	52	30
	21	21	19	68	27	37	34	66	24
	22	28	16	48	29	33	26	38	27
	23	28	17	56	27	40	26	51	31
	24	27	18	49	36	33	27	53	23
	25	28	19	56	31	29	35	62	29
	26	34	19	59	37	34	32	84	26
	27	32	22	55	35	32	24	50	25
	28	30	22	51	38	33	22	46	24
	29	32	20	58	35	36	28	49	28
	30	33	21	61	30	31	32	44	30
	31	42	21	63	34	36	27	45	32
	32	39	19	63	32	29	27	66	35
	33	43	22	66	43	40	25	60	31
	34	46	22	72	37	33	25	52	35
	35	42	25	67	46	37	31	43	35
	36	56	24	55	41	38	27	54	35
	37	34	23	104	37	40	28	50	32
	38	33	19	89	39	29	32	55	37
	39	48	25	72	42	30	27	57	32
	40	36	24	64	37	27	29	44	34
	41	38	27	61	43	32	30	53	32
	42	48	29	56	33	34	32	60	31
	43	42	21	61	43	42	37	54	33
	44	49	33	60	44	37	30	58	31
	45	53	27	67	42	29	26	51	33	50 mg/mL
	46	50	26	59	42	41	24	69	42
	47	52	30	60	46	51	26	52	37
	48	54	26	59	41	30	30	44	39
	49	50	29	52	39	34	32	46	37
	50	49	23	65	46	29	33	46	44
	51	40	31	70	51	37	43	51	44
	52	43	28	66	46	41	38	58	42
	53	47	32	77	50	31	34	56	41
	54	53	29	74	46	29	40	51	53
	55	50	31	74	58	43	36	50	49
	56	58	28	75	58	31	40	61	58
	57	52	32	71	49	41	34	53	48
	58	55	31	95	57	43	38	47	47
	59	57	37	68	43	38	37	50	43
	60	59	41	81	63	44	36	74	53
	61	61	35	65	45	48	38	63	52
	62	58	32	66	47	46	34	51	61
	63	65	36	76	36	39	31	60	61
	64	59	38	73	30	54	37	80	52
	65	59	41	74	42	31	42	54	50
	66	55	44	77	64	54	39	52	46
	67	51	44	67	53	26	42	59	45
	68	65	41	64	47	42	32	59	52
	69	59	40	72	57	39	31	54	50
	70	63	39	71	56	47	32	53	64
	71	72	37	79	51	47	29	59	52
	72	66	37	79	53	40	32	67	55
	73	76	41	71	72	45	35	65	63
	74	84	39	61	54	39	33	61	56
	75	41	42	65	56	54	33	70	70
	76	60	36	77	52	50	36	63	58
	77	69	39	83	64	49	33	54	55
	78	75	36	82	57	51	38	70	66
	79	67	41	200	60	47	37	65	59
	80	80	45	200	77	44	268	58	74	Control BBS
	81	200	45	237	54	47	262	53	217
	82	200	225	132	220	51	167	200	200
	83	183	200	93	200	200	93		200
	84	103	162	79	223	200	112	200	126
	85	81	88	65	126	129	53	132	73
	86	55	73	54	60	106	38	96	62
	87	47	53	57	62	66	27	65	47
	88	37	44	65	49	59	24	49	49
	89	46	39	71	45	39	25	31	47
	90	44	36	68	50	46	31	27	49

## Sheet: Venous ABSORPTION
		REFERENCE				MCB
	Time (min)	Rat 1	Rat 2	Rat 3	Rat 4	Rat 5	Rat 6	Rat 7	Rat 8
	1	198.73	104.18	183.6		307.12	73.15	186.09	292.03
	4	204.46	71.71	192.55	222.4	312.37	62.64	217.92	299
	8	92.25	102.27	75.66	250.75	168.65	77.92	100.04	202.5	15 mg/mL
	12	254.12	76.01	155.25	149.28	194.43	88.9	133.86	170.17
	16	62.16	139.52	84.12	191.56	144.77	214.96	86.61	222.9
	20	76.01	129.97	110.98	120.43	114.21	123.28	109.99	153.26
	24	98.45	206.84	85.11	163.21	158.14	148.59	114.46	182.61
	28	137.13	127.58	118.44	195.04	183.45	85.56	114.96	148.28
	32	98.45	157.19	37.36	229.36	185.36	114.21	90.59	191.06
	36	188.7	128.06	125.4	181.11	246	81.74	214.44	173.16
	40	167.69	159.1	83.62	205.98	121.37	138.09	127.89	201.51
	44	230.72	122.33	155.25	162.21	121.85	91.77	134.36	186.09	50 mg/mL
	48	99.89	205.41	97.05	201.51	95.59	151.46	78.15	272.64
	52	115.64	216.39	125.9	203	124.72	168.65	141.32	216.93
	56	124.72	263.19	73.67	199.52	184.4	114.69	106.5	245.78
	60	124.24	264.14	100.53	94.57	161.01	187.27	139.33	223.89
	64	73.62	242.18	106.5	194.54	150.5	120.42	201.51	225.88
	68	156.23	187.75	132.37	174.65	251.73	188.7	210.96	195.04
	72	182.97	186.79	194.05		203.02		120.43	137.34
	76	203.02	243.13	163.7	183.6	161.96	142.38	174.65	138.83
	80	160.53	304.25	152.76	278.6	167.69	103.71	133.36	277.61
