# Supplementary material for: Microbial Activation of the GLP-2R Mitigates Gastrointestinal Inflammation
Source: Research Square preprint supplement (doi:10.21203/rs.3.rs-6973437/v1), 2025-07-09
Supplement: Supplementary file 12 [file fd2f17e9a43c337a6173f9ae.xlsx]

## Sheet: Readme
Colon damage Scoring system
	Feature	Grade	Description
	Inflammation	0	None
		1	Slight
		2	Moderate
		3	Severe
	Extent	0	None
		1	Partial mucosa
		2	Full mucosa
		3	Muosa + submucosa
	Crypt damage	0	None
		1	1/3
		2	2/3
		3	Only surface epithelium remaining
		4	Entire epithelium lost
	Area involved	1	1-25%
		2	26-50%
		3	51-75%
		4	76-100%
16 DSS cages - 3 mice/cage - 300 mL DSS/cage = 4800 mL 2.5% DSS --> 5000 mL = 5000 mL MiliQ + 125g DSS
16 Cages receiving beta acids from Hops Extract 40% - at a 1:20 concentration - to inhibit microbial fermentation.
250µL plasma saved in RIA tubes for GLP-2 measurements.

## Sheet: Body parameters
Cage_ID	Mouse_ID	Sex	Arrival	Diet	Treatment	Drink	D-7	D0	D1	D2	D3	D4	D5
1	1	M	6 weeks	ComplexReference	Vehicle	Water	23.4	25.1	25	25.2	25.2	25.6	25.8
	2	M	6 weeks	ComplexReference	Vehicle	Water	25.4	25.3	25.4	26.2	25.6	25.9	26.2
	3	M	6 weeks	ComplexReference	Vehicle	Water	24.9	25.8	25.1	26.1	26.1	26.4	26.5
2	4	M	6 weeks	ComplexReference	Vehicle	Water	24.4	24.1	25.6	25.2	25.2	25.8	25.6
	5	M	6 weeks	ComplexReference	Vehicle	Water	25.1	25.4	26.2	25.7	25.7	25.8	25.7
	6	M	6 weeks	ComplexReference	Vehicle	Water	24.9	24.6	25.1	24.8	25	25.4	26
3	7	M	6 weeks	ComplexReference	Vehicle	Water	23.7	25.3	25.4	25.1	25.6	25.1	25.2
	8	M	6 weeks	ComplexReference	Vehicle	Water	26.5	27.2	26.9	24.1	28.2	27.1	27
	9	M	6 weeks	ComplexReference	Vehicle	Water	26	26.1	26.7	26.2	26.5	26.8	27
4	10	M	6 weeks	ComplexReference	Vehicle	Water	25.9	26	27.3	27.5	27.4	27.4	27
	11	M	6 weeks	ComplexReference	Vehicle	Water	23.3	22.5	23.9	23.5	23.7	23.5	23.6
	12	M	6 weeks	ComplexReference	Vehicle	Water	25.9	25.7	27	26.1	26.2	26.4	25.8
5	13	M	6 weeks	ComplexReference	Beta	Water	26.1	27.7	27.6	27.7	27.8	28.2	28.2
	14	M	6 weeks	ComplexReference	Beta	Water	26.3	27.3	27.5	28.5	28.2	28.7	28.8
	15	M	6 weeks	ComplexReference	Beta	Water	24.6	26.1	26.1	26	26.1	26.1	26.2
6	16	M	6 weeks	ComplexReference	Beta	Water	23.4	23.9	24.3	24	24.1	24.3	24.5
	17	M	6 weeks	ComplexReference	Beta	Water	24.8	24.8	25.4	25.6	25.1	25.5	25.7
	18	M	6 weeks	ComplexReference	Beta	Water	24.3	25.6	24.4	24.4	24.2	24.9	25
7	19	M	6 weeks	ComplexReference	Beta	Water	25.2	26.1	26.6	26.4	26.8	26.4	26.5
	20	M	6 weeks	ComplexReference	Beta	Water	26	26.8	26.8	27.1	26.5	25.1	25.3
	21	M	6 weeks	ComplexReference	Beta	Water	26.6	26.2	26.2	27.3	26.7	26.2	26.5
8	22	M	6 weeks	ComplexReference	Beta	Water	25	25.6	26.6	26.7	26.1	26.1	26
	23	M	6 weeks	ComplexReference	Beta	Water	24.4	25	26	26.2	26.1	25.7	25.5
	24	M	6 weeks	ComplexReference	Beta	Water	22.5	23	23	23.7	23.4	23.4	23.6
9	25	M	6 weeks	ComplexReference	Vehicle	DSS	23.2	23.5	23.3	22.8	23.3	23.3	22.6
	26	M	6 weeks	ComplexReference	Vehicle	DSS	24.2	23.6	24.3	24.1	24.2	23.4	23.1
	27	M	6 weeks	ComplexReference	Vehicle	DSS	26.9	26.5	26.5	26	26	25.7	23.5
10	28	M	6 weeks	ComplexReference	Vehicle	DSS	24.5	24.4	24.5	25.5	25.4	24.5	24
	29	M	6 weeks	ComplexReference	Vehicle	DSS	22.8	23.1	23.7	23.6	22.9	22.3	21.8
	30	M	6 weeks	ComplexReference	Vehicle	DSS	23.4	23.8	24.2	23.8	23.8	23.5	22.4
11	31	M	6 weeks	ComplexReference	Vehicle	DSS	25	25.6	25.6	25.3	25.6	25.7	24.6
	32	M	6 weeks	ComplexReference	Vehicle	DSS	24.8	25.1	25.2	25	24.9	24.8	23.4
	33	M	6 weeks	ComplexReference	Vehicle	DSS	24.2	25.5	25.6	25.3	25.1	25.1	24.1
12	34	M	6 weeks	ComplexReference	Vehicle	DSS	24.2	25.4	24.8	24.8	25.8	25.1	24.9
	35	M	6 weeks	ComplexReference	Vehicle	DSS	25.1	25.2	25.3	24.5	25.2	25.3	25
	36	M	6 weeks	ComplexReference	Vehicle	DSS	25.3	26.6	26.7	27	26.2	26.5	25.8
13	37	M	6 weeks	ComplexReference	Beta	DSS	23.5	23.9	24.6	24.3	24.6	24.5	23.9
	38	M	6 weeks	ComplexReference	Beta	DSS	25	25.3	26.3	25.7	26	25.7	25
	39	M	6 weeks	ComplexReference	Beta	DSS	26	27.1	27.3	26.4	27	26.9	26.4
14	40	M	6 weeks	ComplexReference	Beta	DSS	25.4	25.1	25.7	25.5	25.4	26.1	24.8
	41	M	6 weeks	ComplexReference	Beta	DSS	25.1	26.2	26.4	26	26.2	26.8	25.5
	42	M	6 weeks	ComplexReference	Beta	DSS	24.6	24.5	24.3	24.1	23.4	23.2	21.5
15	43	M	6 weeks	ComplexReference	Beta	DSS	24.8	26.1	26.2	26.3	26.4	26.6	26.1
	44	M	6 weeks	ComplexReference	Beta	DSS	23.4	24.1	24	24.2	24.5	24.5	23.9
	45	M	6 weeks	ComplexReference	Beta	DSS	24.7	26	25	26	25.5	25.9	25
16	46	M	6 weeks	ComplexReference	Beta	DSS	27.4	27.1	29	28.3	28.6	27.7	26.8
	47	M	6 weeks	ComplexReference	Beta	DSS	25.8	26.2	26.8	26.9	27	26.7	26
	48	M	6 weeks	ComplexReference	Beta	DSS	26.2	25.7	26.6	25.9	26.4	26.5	25.4
17	49	M	6 weeks	ComplexMcB	Vehicle	Water	22.9	23.8	23.9	24	23.6	24.3	23.9
	50	M	6 weeks	ComplexMcB	Vehicle	Water	25.2	25.1	25.6	25.3	25.4	26	26
	51	M	6 weeks	ComplexMcB	Vehicle	Water	24.8	25.5	25.7	25.2	25.5	26	25.8
18	52	M	6 weeks	ComplexMcB	Vehicle	Water	26.9	27.2	28.4	28	27.8	28.1	27.8
	53	M	6 weeks	ComplexMcB	Vehicle	Water	25.5	25.6	26.3	26.4	26.5	27	26.8
	54	M	6 weeks	ComplexMcB	Vehicle	Water	24.7	24	24.8	24.8	24.9	25.3	25.2
19	55	M	6 weeks	ComplexMcB	Vehicle	Water	25.7	26.2	27	27	26.9	27	27.4
	56	M	6 weeks	ComplexMcB	Vehicle	Water	25.8	26.8	27.4	27.4	27.3	27.4	27.5
	57	M	6 weeks	ComplexMcB	Vehicle	Water	24.5	25.2	25.5	25.3	25.3	25.5	25.6
20	58	M	6 weeks	ComplexMcB	Vehicle	Water	25.7	26.6	26.8	26.8	27	26.8	26.8
	59	M	6 weeks	ComplexMcB	Vehicle	Water	25.9	26.5	26.5	26.7	26.8	26.5	26.6
	60	M	6 weeks	ComplexMcB	Vehicle	Water	23.4	24.6	25.1	25.3	26	25.1	25.8
21	61	M	6 weeks	ComplexMcB	Beta	Water	25.4	26.1	26.2	26.7	26.7	26.8	27.5
	62	M	6 weeks	ComplexMcB	Beta	Water	24.1	24.5	25.2	25.4	25	25.5	25.4
	63	M	6 weeks	ComplexMcB	Beta	Water	23	23.1	22.8	23.8	24.2	24.6	24.7
22	64	M	6 weeks	ComplexMcB	Beta	Water	25	26.1	26.7	26.6	26.3	26	26.1
	65	M	6 weeks	ComplexMcB	Beta	Water	23.1	23.5	23.6	23.6	25.5	23.5	23.6
	66	M	6 weeks	ComplexMcB	Beta	Water	23	23.8	24.3	24.4	24.3	24.2	24.3
23	67	M	6 weeks	ComplexMcB	Beta	Water	24.4	25.2	25.6	26.2	25.6	25.4	25.4
	68	M	6 weeks	ComplexMcB	Beta	Water	22.7	23.4	23.2	23.9	24	23.5	24
	69	M	6 weeks	ComplexMcB	Beta	Water	25.2	25.9	26.6	26.6	26.6	26.6	26.5
24	70	M	6 weeks	ComplexMcB	Beta	Water	25.2	26	25.7	25.9	26	26	26
	71	M	6 weeks	ComplexMcB	Beta	Water	24.4	25.4	25.1	25.5	25.5	25.1	25.4
	72	M	6 weeks	ComplexMcB	Beta	Water	24.3	24.9	25	25.6	24.8	24.9	25
25	73	M	6 weeks	ComplexMcB	Vehicle	DSS	25	25.7	26	26	26.1	26.2	26.3
	74	M	6 weeks	ComplexMcB	Vehicle	DSS	24	24.7	24.7	24.5	24.3	25	24.5
	75	M	6 weeks	ComplexMcB	Vehicle	DSS	25.6	26.5	26.8	26.8	27	27	26.7
26	76	M	6 weeks	ComplexMcB	Vehicle	DSS	26.6	27.5	27.2	28.1	28.1	28.2	28
	77	M	6 weeks	ComplexMcB	Vehicle	DSS	23.7	25.1	25	25	24.6	24.5	24.8
	78	M	6 weeks	ComplexMcB	Vehicle	DSS	26.6	26.6	27.5	27.4	27.1	27.8	28
27	79	M	6 weeks	ComplexMcB	Vehicle	DSS	27.5	28	28.2	28.2	28.2	28.2	28.8
	80	M	6 weeks	ComplexMcB	Vehicle	DSS	24.7	25.3	25.6	25.4	25.8	25.3	25
	81	M	6 weeks	ComplexMcB	Vehicle	26.4	24.8	26.4	26.5	26.2	26.5	27	27.6
28	82	M	6 weeks	ComplexMcB	Vehicle	DSS	25.4	26.1	26.1	26.4	26.5	26.9	26.7
	83	M	6 weeks	ComplexMcB	Vehicle	DSS	25.9	26.9	26.7	26.8	26.8	26.9	27
	84	M	6 weeks	ComplexMcB	Vehicle	DSS	24.4	25	25.2	24.7	24.6	24.6	24.8
29	85	M	6 weeks	ComplexMcB	Beta	DSS	2.5	24.8	23.6	24.1	24	24.8	24
	86	M	6 weeks	ComplexMcB	Beta	DSS	26.5	27.4	27	26.3	26.2	27	27
	87	M	6 weeks	ComplexMcB	Beta	DSS	24.6	25.5	25.7	25.3	25.5	25.6	24.9
30	88	M	6 weeks	ComplexMcB	Beta	DSS	26.2	26.9	27.3	27.5	27.5	27.5	27.6
	89	M	6 weeks	ComplexMcB	Beta	DSS	24.4	25.8	25.8	26.8	26.7	26.5	26.9
	90	M	6 weeks	ComplexMcB	Beta	DSS	23.2	23.5	23.6	24.6	24	24.3	24.6
31	91	M	6 weeks	ComplexMcB	Beta	DSS	24.7	26.3	26.1	26	25.8	26	26
	92	M	6 weeks	ComplexMcB	Beta	DSS	23.4	24.1	24	24	23.7	23.9	23.7
	93	M	6 weeks	ComplexMcB	Beta	DSS	24	25.3	25.1	25.4	25.4	25.1	24.8
32	94	M	6 weeks	ComplexMcB	Beta	DSS	25.9	26.1	26	25.9	26.1	26	25.4
	95	M	6 weeks	ComplexMcB	Beta	DSS	26	26	26.1	26.7	26.5	26.1	25.8
	96	M	6 weeks	ComplexMcB	Beta	DSS	24.9	24.8	26	25.5	25.6	25.5	25.2

## Sheet: Weight gain
Cage_ID	Mouse_ID	Sex	Arrival	Diet	Treatment	Drink	D0	D1	D2	D3	D4	D5
1	1	M	6 weeks	ComplexReference	Vehicle	Water	0	-0.1	0.1	0.1	0.5	0.7
	2	M	6 weeks	ComplexReference	Vehicle	Water	0	0.1	0.9	0.3	0.6	0.9
	3	M	6 weeks	ComplexReference	Vehicle	Water	0	-0.7	0.3	0.3	0.6	0.7
2	4	M	6 weeks	ComplexReference	Vehicle	Water	0	1.5	1.1	1.1	1.7	1.5
	5	M	6 weeks	ComplexReference	Vehicle	Water	0	0.8	0.3	0.3	0.4	0.3
	6	M	6 weeks	ComplexReference	Vehicle	Water	0	0.5	0.2	0.4	0.8	1.4
3	7	M	6 weeks	ComplexReference	Vehicle	Water	0	0.1	-0.2	0.3	-0.2	-0.1
	8	M	6 weeks	ComplexReference	Vehicle	Water	0	-0.3	-3.1	1	-0.1	-0.2
	9	M	6 weeks	ComplexReference	Vehicle	Water	0	0.6	0.1	0.4	0.7	0.9
4	10	M	6 weeks	ComplexReference	Vehicle	Water	0	1.3	1.5	1.4	1.4	1
	11	M	6 weeks	ComplexReference	Vehicle	Water	0	1.4	1	1.2	1	1.1
	12	M	6 weeks	ComplexReference	Vehicle	Water	0	1.3	0.4	0.5	0.7	0.1
5	13	M	6 weeks	ComplexReference	Beta	Water	0	-0.1	0	0.1	0.5	0.5
	14	M	6 weeks	ComplexReference	Beta	Water	0	0.2	1.2	0.9	1.4	1.5
	15	M	6 weeks	ComplexReference	Beta	Water	0	0	-0.1	0	0	0.1
6	16	M	6 weeks	ComplexReference	Beta	Water	0	0.4	0.1	0.2	0.4	0.6
	17	M	6 weeks	ComplexReference	Beta	Water	0	0.6	0.8	0.3	0.7	0.9
	18	M	6 weeks	ComplexReference	Beta	Water	0	-1.2	-1.2	-1.4	-0.7	-0.6
7	19	M	6 weeks	ComplexReference	Beta	Water	0	0.5	0.3	0.7	0.3	0.4
	20	M	6 weeks	ComplexReference	Beta	Water	0	0	0.3	-0.3	-1.7	-1.5
	21	M	6 weeks	ComplexReference	Beta	Water	0	0	1.1	0.5	0	0.3
8	22	M	6 weeks	ComplexReference	Beta	Water	0	1	1.1	0.5	0.5	0.4
	23	M	6 weeks	ComplexReference	Beta	Water	0	1	1.2	1.1	0.7	0.5
	24	M	6 weeks	ComplexReference	Beta	Water	0	0	0.7	0.4	0.4	0.6
9	25	M	6 weeks	ComplexReference	Vehicle	DSS	0	-0.2	-0.7	-0.2	-0.2	-0.9
	26	M	6 weeks	ComplexReference	Vehicle	DSS	0	0.7	0.5	0.6	-0.2	-0.5
	27	M	6 weeks	ComplexReference	Vehicle	DSS	0	0	-0.5	-0.5	-0.8	-3
10	28	M	6 weeks	ComplexReference	Vehicle	DSS	0	0.1	1.1	1	0.1	-0.4
	29	M	6 weeks	ComplexReference	Vehicle	DSS	0	0.6	0.5	-0.2	-0.8	-1.3
	30	M	6 weeks	ComplexReference	Vehicle	DSS	0	0.4	0	0	-0.3	-1.4
11	31	M	6 weeks	ComplexReference	Vehicle	DSS	0	0	-0.3	0	0.1	-1
	32	M	6 weeks	ComplexReference	Vehicle	DSS	0	0.1	-0.1	-0.2	-0.3	-1.7
	33	M	6 weeks	ComplexReference	Vehicle	DSS	0	0.1	-0.2	-0.4	-0.4	-1.4
12	34	M	6 weeks	ComplexReference	Vehicle	DSS	0	-0.6	-0.6	0.4	-0.3	-0.5
	35	M	6 weeks	ComplexReference	Vehicle	DSS	0	0.1	-0.7	0	0.1	-0.2
	36	M	6 weeks	ComplexReference	Vehicle	DSS	0	0.1	0.4	-0.4	-0.1	-0.8
13	37	M	6 weeks	ComplexReference	Beta	DSS	0	0.7	0.4	0.7	0.6	0
	38	M	6 weeks	ComplexReference	Beta	DSS	0	1	0.4	0.7	0.4	-0.3
	39	M	6 weeks	ComplexReference	Beta	DSS	0	0.2	-0.7	-0.1	-0.2	-0.7
14	40	M	6 weeks	ComplexReference	Beta	DSS	0	0.6	0.4	0.3	1	-0.3
	41	M	6 weeks	ComplexReference	Beta	DSS	0	0.2	-0.2	0	0.6	-0.7
	42	M	6 weeks	ComplexReference	Beta	DSS	0	-0.2	-0.4	-1.1	-1.3	-3
15	43	M	6 weeks	ComplexReference	Beta	DSS	0	0.1	0.2	0.3	0.5	0
	44	M	6 weeks	ComplexReference	Beta	DSS	0	-0.1	0.1	0.4	0.4	-0.2
	45	M	6 weeks	ComplexReference	Beta	DSS	0	-1	0	-0.5	-0.1	-1
16	46	M	6 weeks	ComplexReference	Beta	DSS	0	1.9	1.2	1.5	0.6	-0.3
	47	M	6 weeks	ComplexReference	Beta	DSS	0	0.6	0.7	0.8	0.5	-0.2
	48	M	6 weeks	ComplexReference	Beta	DSS	0	0.9	0.2	0.7	0.8	-0.3
17	49	M	6 weeks	ComplexMcB	Vehicle	Water	0	0.1	0.2	-0.2	0.5	0.1
	50	M	6 weeks	ComplexMcB	Vehicle	Water	0	0.5	0.2	0.3	0.9	0.9
	51	M	6 weeks	ComplexMcB	Vehicle	Water	0	0.2	-0.3	0	0.5	0.3
18	52	M	6 weeks	ComplexMcB	Vehicle	Water	0	1.2	0.8	0.6	0.9	0.6
	53	M	6 weeks	ComplexMcB	Vehicle	Water	0	0.7	0.8	0.9	1.4	1.2
	54	M	6 weeks	ComplexMcB	Vehicle	Water	0	0.8	0.8	0.9	1.3	1.2
19	55	M	6 weeks	ComplexMcB	Vehicle	Water	0	0.8	0.8	0.7	0.8	1.2
	56	M	6 weeks	ComplexMcB	Vehicle	Water	0	0.6	0.6	0.5	0.6	0.7
	57	M	6 weeks	ComplexMcB	Vehicle	Water	0	0.3	0.1	0.1	0.3	0.4
20	58	M	6 weeks	ComplexMcB	Vehicle	Water	0	0.2	0.2	0.4	0.2	0.2
	59	M	6 weeks	ComplexMcB	Vehicle	Water	0	0	0.2	0.3	0	0.1
	60	M	6 weeks	ComplexMcB	Vehicle	Water	0	0.5	0.7	1.4	0.5	1.2
21	61	M	6 weeks	ComplexMcB	Beta	Water	0	0.1	0.6	0.6	0.7	1.4
	62	M	6 weeks	ComplexMcB	Beta	Water	0	0.7	0.9	0.5	1	0.9
	63	M	6 weeks	ComplexMcB	Beta	Water	0	-0.3	0.7	1.1	1.5	1.6
22	64	M	6 weeks	ComplexMcB	Beta	Water	0	0.6	0.5	0.2	-0.1	0
	65	M	6 weeks	ComplexMcB	Beta	Water	0	0.1	0.1	2	0	0.1
	66	M	6 weeks	ComplexMcB	Beta	Water	0	0.8	1.3	1.4	1.3	1.3
23	67	M	6 weeks	ComplexMcB	Beta	Water	0	0.4	1	0.4	0.2	0.2
	68	M	6 weeks	ComplexMcB	Beta	Water	0	-0.2	0.5	0.6	0.1	0.6
	69	M	6 weeks	ComplexMcB	Beta	Water	0	0.7	0.7	0.7	0.7	0.6
24	70	M	6 weeks	ComplexMcB	Beta	Water	0	-0.3	-0.1	0	0	0
	71	M	6 weeks	ComplexMcB	Beta	Water	0	-0.3	0.1	0.1	-0.3	0
	72	M	6 weeks	ComplexMcB	Beta	Water	0	0.1	0.7	-0.1	0	0.1
25	73	M	6 weeks	ComplexMcB	Vehicle	DSS	0	0.3	0.3	0.4	0.5	0.6
	74	M	6 weeks	ComplexMcB	Vehicle	DSS	0	0	-0.2	-0.4	0.3	-0.2
	75	M	6 weeks	ComplexMcB	Vehicle	DSS	0	0.3	0.3	0.5	0.5	0.2
26	76	M	6 weeks	ComplexMcB	Vehicle	DSS	0	-0.3	0.6	0.6	0.7	0.5
	77	M	6 weeks	ComplexMcB	Vehicle	DSS	0	-0.1	-0.1	-0.5	-0.6	-0.3
	78	M	6 weeks	ComplexMcB	Vehicle	DSS	0	0.9	0.8	0.5	1.2	1.4
27	79	M	6 weeks	ComplexMcB	Vehicle	DSS	0	0.2	0.2	0.2	0.2	0.8
	80	M	6 weeks	ComplexMcB	Vehicle	DSS	0	0.3	0.1	0.5	0	-0.3
	81	M	6 weeks	ComplexMcB	Vehicle	DSS	0	0.1	-0.2	0.1	0.6	1.2
28	82	M	6 weeks	ComplexMcB	Vehicle	DSS	0	0	0.3	0.4	0.8	0.6
	83	M	6 weeks	ComplexMcB	Vehicle	DSS	0	-0.2	-0.1	-0.1	0	0.1
	84	M	6 weeks	ComplexMcB	Vehicle	DSS	0	0.2	-0.3	-0.4	-0.4	-0.2
29	85	M	6 weeks	ComplexMcB	Beta	DSS	0	-1.2	-0.7	-0.8	0	-0.8
	86	M	6 weeks	ComplexMcB	Beta	DSS	0	-0.4	-1.1	-1.2	-0.4	-0.4
	87	M	6 weeks	ComplexMcB	Beta	DSS	0	0.2	-0.2	0	0.1	-0.6
30	88	M	6 weeks	ComplexMcB	Beta	DSS	0	0.4	0.6	0.6	0.6	0.7
	89	M	6 weeks	ComplexMcB	Beta	DSS	0	0	1	0.9	0.7	1.1
	90	M	6 weeks	ComplexMcB	Beta	DSS	0	0.1	1.1	0.5	0.8	1.1
31	91	M	6 weeks	ComplexMcB	Beta	DSS	0	-0.2	-0.3	-0.5	-0.3	-0.3
	92	M	6 weeks	ComplexMcB	Beta	DSS	0	-0.1	-0.1	-0.4	-0.2	-0.4
	93	M	6 weeks	ComplexMcB	Beta	DSS	0	-0.2	0.1	0.1	-0.2	-0.5
32	94	M	6 weeks	ComplexMcB	Beta	DSS	0	-0.1	-0.2	0	-0.1	-0.7
	95	M	6 weeks	ComplexMcB	Beta	DSS	0	0.1	0.7	0.5	0.1	-0.2
	96	M	6 weeks	ComplexMcB	Beta	DSS	0	1.2	0.7	0.8	0.7	0.4

## Sheet: WeightPct
Cage_ID	Mouse_ID	Sex	Arrival	Diet	Treatment	Drink	D0	D1	D2	D3	D4	D5
1	1	M	6 weeks	ComplexReference	Vehicle	Water	0	-0.398406	0.398406	0.398406	1.99203	2.78884
	2	M	6 weeks	ComplexReference	Vehicle	Water	0	0.395257	3.55731	1.18577	2.37154	3.55731
	3	M	6 weeks	ComplexReference	Vehicle	Water	0	-2.71318	1.16279	1.16279	2.32558	2.71318
2	4	M	6 weeks	ComplexReference	Vehicle	Water	0	6.22407	4.56432	4.56432	7.05394	6.22407
	5	M	6 weeks	ComplexReference	Vehicle	Water	0	3.14961	1.1811	1.1811	1.5748	1.1811
	6	M	6 weeks	ComplexReference	Vehicle	Water	0	2.03252	0.813008	1.62602	3.25203	5.69106
3	7	M	6 weeks	ComplexReference	Vehicle	Water	0	0.395257	-0.790514	1.18577	-0.790514	-0.395257
	8	M	6 weeks	ComplexReference	Vehicle	Water	0	-1.10294	-11.3971	3.67647	-0.367647	-0.735294
	9	M	6 weeks	ComplexReference	Vehicle	Water	0	2.29885	0.383142	1.53257	2.68199	3.44828
4	10	M	6 weeks	ComplexReference	Vehicle	Water	0	5	5.76923	5.38462	5.38462	3.84615
	11	M	6 weeks	ComplexReference	Vehicle	Water	0	6.22222	4.44444	5.33333	4.44444	4.88889
	12	M	6 weeks	ComplexReference	Vehicle	Water	0	5.05837	1.55642	1.94553	2.72374	0.389105
5	13	M	6 weeks	ComplexReference	Beta	Water	0	-0.361011	0	0.361011	1.80505	1.80505
	14	M	6 weeks	ComplexReference	Beta	Water	0	0.732601	4.3956	3.2967	5.12821	5.49451
	15	M	6 weeks	ComplexReference	Beta	Water	0	0	-0.383142	0	0	0.383142
6	16	M	6 weeks	ComplexReference	Beta	Water	0	1.67364	0.41841	0.83682	1.67364	2.51046
	17	M	6 weeks	ComplexReference	Beta	Water	0	2.41935	3.22581	1.20968	2.82258	3.62903
	18	M	6 weeks	ComplexReference	Beta	Water	0	-4.6875	-4.6875	-5.46875	-2.73438	-2.34375
7	19	M	6 weeks	ComplexReference	Beta	Water	0	1.91571	1.14943	2.68199	1.14943	1.53257
	20	M	6 weeks	ComplexReference	Beta	Water	0	0	1.1194	-1.1194	-6.34328	-5.59701
	21	M	6 weeks	ComplexReference	Beta	Water	0	0	4.19847	1.9084	0	1.14504
8	22	M	6 weeks	ComplexReference	Beta	Water	0	3.90625	4.29687	1.95312	1.95312	1.5625
	23	M	6 weeks	ComplexReference	Beta	Water	0	4	4.8	4.4	2.8	2
	24	M	6 weeks	ComplexReference	Beta	Water	0	0	3.04348	1.73913	1.73913	2.6087
9	25	M	6 weeks	ComplexReference	Vehicle	DSS	0	-0.851064	-2.97872	-0.851064	-0.851064	-3.82979
	26	M	6 weeks	ComplexReference	Vehicle	DSS	0	2.9661	2.11864	2.54237	-0.847458	-2.11864
	27	M	6 weeks	ComplexReference	Vehicle	DSS	0	0	-1.88679	-1.88679	-3.01887	-11.3208
10	28	M	6 weeks	ComplexReference	Vehicle	DSS	0	0.409836	4.5082	4.09836	0.409836	-1.63934
	29	M	6 weeks	ComplexReference	Vehicle	DSS	0	2.5974	2.1645	-0.865801	-3.4632	-5.62771
	30	M	6 weeks	ComplexReference	Vehicle	DSS	0	1.68067	0	0	-1.2605	-5.88235
11	31	M	6 weeks	ComplexReference	Vehicle	DSS	0	0	-1.17188	0	0.390625	-3.90625
	32	M	6 weeks	ComplexReference	Vehicle	DSS	0	0.398406	-0.398406	-0.796813	-1.19522	-6.77291
	33	M	6 weeks	ComplexReference	Vehicle	DSS	0	0.392157	-0.784314	-1.56863	-1.56863	-5.4902
12	34	M	6 weeks	ComplexReference	Vehicle	DSS	0	-2.3622	-2.3622	1.5748	-1.1811	-1.9685
	35	M	6 weeks	ComplexReference	Vehicle	DSS	0	0.396825	-2.77778	0	0.396825	-0.793651
	36	M	6 weeks	ComplexReference	Vehicle	DSS	0	0.37594	1.50376	-1.50376	-0.37594	-3.00752
13	37	M	6 weeks	ComplexReference	Beta	DSS	0	2.92887	1.67364	2.92887	2.51046	0
	38	M	6 weeks	ComplexReference	Beta	DSS	0	3.95257	1.58103	2.7668	1.58103	-1.18577
	39	M	6 weeks	ComplexReference	Beta	DSS	0	0.738007	-2.58303	-0.369004	-0.738007	-2.58303
14	40	M	6 weeks	ComplexReference	Beta	DSS	0	2.39044	1.59363	1.19522	3.98406	-1.19522
	41	M	6 weeks	ComplexReference	Beta	DSS	0	0.763359	-0.763359	0	2.29008	-2.67176
	42	M	6 weeks	ComplexReference	Beta	DSS	0	-0.816327	-1.63265	-4.4898	-5.30612	-12.2449
15	43	M	6 weeks	ComplexReference	Beta	DSS	0	0.383142	0.766284	1.14943	1.91571	0
	44	M	6 weeks	ComplexReference	Beta	DSS	0	-0.414938	0.414938	1.65975	1.65975	-0.829876
	45	M	6 weeks	ComplexReference	Beta	DSS	0	-3.84615	0	-1.92308	-0.384615	-3.84615
16	46	M	6 weeks	ComplexReference	Beta	DSS	0	7.01107	4.42804	5.53506	2.21402	-1.10701
	47	M	6 weeks	ComplexReference	Beta	DSS	0	2.29008	2.67176	3.05344	1.9084	-0.763359
	48	M	6 weeks	ComplexReference	Beta	DSS	0	3.50195	0.77821	2.72374	3.11284	-1.16732
17	49	M	6 weeks	ComplexMcB	Vehicle	Water	0	0.420168	0.840336	-0.840336	2.10084	0.420168
	50	M	6 weeks	ComplexMcB	Vehicle	Water	0	1.99203	0.796813	1.19522	3.58566	3.58566
	51	M	6 weeks	ComplexMcB	Vehicle	Water	0	0.784314	-1.17647	0	1.96078	1.17647
18	52	M	6 weeks	ComplexMcB	Vehicle	Water	0	4.41176	2.94118	2.20588	3.30882	2.20588
	53	M	6 weeks	ComplexMcB	Vehicle	Water	0	2.73437	3.125	3.51562	5.46875	4.6875
	54	M	6 weeks	ComplexMcB	Vehicle	Water	0	3.33333	3.33333	3.75	5.41667	5
19	55	M	6 weeks	ComplexMcB	Vehicle	Water	0	3.05344	3.05344	2.67176	3.05344	4.58015
	56	M	6 weeks	ComplexMcB	Vehicle	Water	0	2.23881	2.23881	1.86567	2.23881	2.61194
	57	M	6 weeks	ComplexMcB	Vehicle	Water	0	1.19048	0.396825	0.396825	1.19048	1.5873
20	58	M	6 weeks	ComplexMcB	Vehicle	Water	0	0.75188	0.75188	1.50376	0.75188	0.75188
	59	M	6 weeks	ComplexMcB	Vehicle	Water	0	0	0.754717	1.13208	0	0.377358
	60	M	6 weeks	ComplexMcB	Vehicle	Water	0	2.03252	2.84553	5.69106	2.03252	4.87805
21	61	M	6 weeks	ComplexMcB	Beta	Water	0	0.383142	2.29885	2.29885	2.68199	5.36398
	62	M	6 weeks	ComplexMcB	Beta	Water	0	2.85714	3.67347	2.04082	4.08163	3.67347
	63	M	6 weeks	ComplexMcB	Beta	Water	0	-1.2987	3.0303	4.7619	6.49351	6.92641
22	64	M	6 weeks	ComplexMcB	Beta	Water	0	2.29885	1.91571	0.766284	-0.383142	0
	65	M	6 weeks	ComplexMcB	Beta	Water	0	0.425532	0.425532	8.51064	0	0.425532
	66	M	6 weeks	ComplexMcB	Beta	Water	0	3.47826	5.65217	6.08696	5.65217	5.65217
23	67	M	6 weeks	ComplexMcB	Beta	Water	0	1.5873	3.96825	1.5873	0.793651	0.793651
	68	M	6 weeks	ComplexMcB	Beta	Water	0	-0.854701	2.13675	2.5641	0.42735	2.5641
	69	M	6 weeks	ComplexMcB	Beta	Water	0	2.7027	2.7027	2.7027	2.7027	2.3166
24	70	M	6 weeks	ComplexMcB	Beta	Water	0	-1.15385	-0.384615	0	0	0
	71	M	6 weeks	ComplexMcB	Beta	Water	0	-1.1811	0.393701	0.393701	-1.1811	0
	72	M	6 weeks	ComplexMcB	Beta	Water	0	0.401606	2.81124	-0.401606	0	0.401606
25	73	M	6 weeks	ComplexMcB	Vehicle	DSS	0	1.16732	1.16732	1.55642	1.94553	2.33463
	74	M	6 weeks	ComplexMcB	Vehicle	DSS	0	0	-0.809717	-1.61943	1.21457	-0.809717
	75	M	6 weeks	ComplexMcB	Vehicle	DSS	0	1.13208	1.13208	1.88679	1.88679	0.754717
26	76	M	6 weeks	ComplexMcB	Vehicle	DSS	0	-1.09091	2.18182	2.18182	2.54545	1.81818
	77	M	6 weeks	ComplexMcB	Vehicle	DSS	0	-0.398406	-0.398406	-1.99203	-2.39044	-1.19522
	78	M	6 weeks	ComplexMcB	Vehicle	DSS	0	3.38346	3.00752	1.8797	4.51128	5.26316
27	79	M	6 weeks	ComplexMcB	Vehicle	DSS	0	0.714286	0.714286	0.714286	0.714286	2.85714
	80	M	6 weeks	ComplexMcB	Vehicle	DSS	0	1.18577	0.395257	1.97628	0	-1.18577
	81	M	6 weeks	ComplexMcB	Vehicle	DSS	0	0.378788	-0.757576	0.378788	2.27273	4.54545
28	82	M	6 weeks	ComplexMcB	Vehicle	DSS	0	0	1.14943	1.53257	3.06513	2.29885
	83	M	6 weeks	ComplexMcB	Vehicle	DSS	0	-0.743494	-0.371747	-0.371747	0	0.371747
	84	M	6 weeks	ComplexMcB	Vehicle	DSS	0	0.8	-1.2	-1.6	-1.6	-0.8
29	85	M	6 weeks	ComplexMcB	Beta	DSS	0	-4.83871	-2.82258	-3.22581	0	-3.22581
	86	M	6 weeks	ComplexMcB	Beta	DSS	0	-1.45985	-4.0146	-4.37956	-1.45985	-1.45985
	87	M	6 weeks	ComplexMcB	Beta	DSS	0	0.784314	-0.784314	0	0.392157	-2.35294
30	88	M	6 weeks	ComplexMcB	Beta	DSS	0	1.48699	2.23048	2.23048	2.23048	2.60223
	89	M	6 weeks	ComplexMcB	Beta	DSS	0	0	3.87597	3.48837	2.71318	4.26357
	90	M	6 weeks	ComplexMcB	Beta	DSS	0	0.425532	4.68085	2.12766	3.40426	4.68085
31	91	M	6 weeks	ComplexMcB	Beta	DSS	0	-0.760456	-1.14068	-1.90114	-1.14068	-1.14068
	92	M	6 weeks	ComplexMcB	Beta	DSS	0	-0.414938	-0.414938	-1.65975	-0.829876	-1.65975
	93	M	6 weeks	ComplexMcB	Beta	DSS	0	-0.790514	0.395257	0.395257	-0.790514	-1.97628
32	94	M	6 weeks	ComplexMcB	Beta	DSS	0	-0.383142	-0.766284	0	-0.383142	-2.68199
	95	M	6 weeks	ComplexMcB	Beta	DSS	0	0.384615	2.69231	1.92308	0.384615	-0.769231
	96	M	6 weeks	ComplexMcB	Beta	DSS	0	4.83871	2.82258	3.22581	2.82258	1.6129

## Sheet: DAS
Cage_ID	Mouse_ID	Sex	Arrival	Diet	Treatment	Drink	D0	D1	D2	D3	D4	D5
1	1	M	6 weeks	ComplexReference	Vehicle	Water	0	0	0	0	0	0
	2	M	6 weeks	ComplexReference	Vehicle	Water	0	0	0	0	0	0
	3	M	6 weeks	ComplexReference	Vehicle	Water	0	1	0	0	0	0
2	4	M	6 weeks	ComplexReference	Vehicle	Water	0	0	0	0	0	0
	5	M	6 weeks	ComplexReference	Vehicle	Water	0	0	0	0	0	0
	6	M	6 weeks	ComplexReference	Vehicle	Water	0	0	0	0	0	0
3	7	M	6 weeks	ComplexReference	Vehicle	Water	0	0	0	0	0	0
	8	M	6 weeks	ComplexReference	Vehicle	Water	0	1	3	0	0	0
	9	M	6 weeks	ComplexReference	Vehicle	Water	0	0	0	0	0	0
4	10	M	6 weeks	ComplexReference	Vehicle	Water	0	0	0	0	1	0
	11	M	6 weeks	ComplexReference	Vehicle	Water	0	0	0	0	0	0
	12	M	6 weeks	ComplexReference	Vehicle	Water	0	0	0	0	0	0
5	13	M	6 weeks	ComplexReference	Beta	Water	0	0	0	0	0	0
	14	M	6 weeks	ComplexReference	Beta	Water	0	0	0	0	0	0
	15	M	6 weeks	ComplexReference	Beta	Water	0	0	0	0	0	0
6	16	M	6 weeks	ComplexReference	Beta	Water	0	0	0	0	0	0
	17	M	6 weeks	ComplexReference	Beta	Water	0	0	0	0	0	0
	18	M	6 weeks	ComplexReference	Beta	Water	0	2	2	2	1	2
7	19	M	6 weeks	ComplexReference	Beta	Water	0	0	0	0	0	0
	20	M	6 weeks	ComplexReference	Beta	Water	0	0	1	1	2	2
	21	M	6 weeks	ComplexReference	Beta	Water	0	0	0	0	0	0
8	22	M	6 weeks	ComplexReference	Beta	Water	0	0	0	0	1	1
	23	M	6 weeks	ComplexReference	Beta	Water	0	0	0	0	0	0
	24	M	6 weeks	ComplexReference	Beta	Water	0	0	1	0	0	0
9	25	M	6 weeks	ComplexReference	Vehicle	DSS	0	2	2	5	5	7
	26	M	6 weeks	ComplexReference	Vehicle	DSS	0	2	1	3	4	5
	27	M	6 weeks	ComplexReference	Vehicle	DSS	0	2	4	4	5	8
10	28	M	6 weeks	ComplexReference	Vehicle	DSS	0	1	2	1	2	5
	29	M	6 weeks	ComplexReference	Vehicle	DSS	0	2	2	1	3	6
	30	M	6 weeks	ComplexReference	Vehicle	DSS	0	2	2	2	3	6
11	31	M	6 weeks	ComplexReference	Vehicle	DSS	0	2	3	3	3	5
	32	M	6 weeks	ComplexReference	Vehicle	DSS	0	2	4	3	4	9
	33	M	6 weeks	ComplexReference	Vehicle	DSS	0	1	2	3	4	6
12	34	M	6 weeks	ComplexReference	Vehicle	DSS	0	2	3	2	3	7
	35	M	6 weeks	ComplexReference	Vehicle	DSS	0	1	2	2	3	4
	36	M	6 weeks	ComplexReference	Vehicle	DSS	0	1	2	3	3	5
13	37	M	6 weeks	ComplexReference	Beta	DSS	0	1	1	1	2	5
	38	M	6 weeks	ComplexReference	Beta	DSS	0	1	2	4	4	8
	39	M	6 weeks	ComplexReference	Beta	DSS	0	2	3	3	1	4
14	40	M	6 weeks	ComplexReference	Beta	DSS	0	1	1	2	0	5
	41	M	6 weeks	ComplexReference	Beta	DSS	0	1	1	1	0	6
	42	M	6 weeks	ComplexReference	Beta	DSS	0	2	6	6	7	11
15	43	M	6 weeks	ComplexReference	Beta	DSS	0	1	2	2	2	3
	44	M	6 weeks	ComplexReference	Beta	DSS	0	2	1	2	1	2
	45	M	6 weeks	ComplexReference	Beta	DSS	0	2	1	2	2	4
16	46	M	6 weeks	ComplexReference	Beta	DSS	0	1	2	2	2	5
	47	M	6 weeks	ComplexReference	Beta	DSS	0	2	1	2	3	4
	48	M	6 weeks	ComplexReference	Beta	DSS	0	1	2	2	3	5
17	49	M	6 weeks	ComplexMcB	Vehicle	Water	0	0	0	0	0	0
	50	M	6 weeks	ComplexMcB	Vehicle	Water	0	0	0	0	0	0
	51	M	6 weeks	ComplexMcB	Vehicle	Water	0	0	1	0	0	0
18	52	M	6 weeks	ComplexMcB	Vehicle	Water	0	0	0	0	0	0
	53	M	6 weeks	ComplexMcB	Vehicle	Water	0	0	0	0	0	0
	54	M	6 weeks	ComplexMcB	Vehicle	Water	0	0	0	0	0	0
19	55	M	6 weeks	ComplexMcB	Vehicle	Water	0	0	0	0	1	0
	56	M	6 weeks	ComplexMcB	Vehicle	Water	0	0	0	0	1	0
	57	M	6 weeks	ComplexMcB	Vehicle	Water	0	0	0	0	1	1
20	58	M	6 weeks	ComplexMcB	Vehicle	Water	0	0	1	0	1	1
	59	M	6 weeks	ComplexMcB	Vehicle	Water	0	0	0	0	0	0
	60	M	6 weeks	ComplexMcB	Vehicle	Water	0	0	0	0	0	0
21	61	M	6 weeks	ComplexMcB	Beta	Water	0	0	0	0	0	0
	62	M	6 weeks	ComplexMcB	Beta	Water	0	0	0	0	0	0
	63	M	6 weeks	ComplexMcB	Beta	Water	0	1	0	0	0	0
22	64	M	6 weeks	ComplexMcB	Beta	Water	0	0	0	1	0	0
	65	M	6 weeks	ComplexMcB	Beta	Water	0	0	0	0	1	0
	66	M	6 weeks	ComplexMcB	Beta	Water	0	0	0	1	0	0
23	67	M	6 weeks	ComplexMcB	Beta	Water	0	0	0	0	1	0
	68	M	6 weeks	ComplexMcB	Beta	Water	0	0	1	0	0	0
	69	M	6 weeks	ComplexMcB	Beta	Water	0	0	0	0	0	1
24	70	M	6 weeks	ComplexMcB	Beta	Water	0	1	0	0	0	0
	71	M	6 weeks	ComplexMcB	Beta	Water	0	2	0	0	2	0
	72	M	6 weeks	ComplexMcB	Beta	Water	0	0	0	0	0	0
25	73	M	6 weeks	ComplexMcB	Vehicle	DSS	0	0	0	0	0	1
	74	M	6 weeks	ComplexMcB	Vehicle	DSS	0	1	1	2	1	2
	75	M	6 weeks	ComplexMcB	Vehicle	DSS	0	1	1	0	0	1
26	76	M	6 weeks	ComplexMcB	Vehicle	DSS	0	1	1	1	2	3
	77	M	6 weeks	ComplexMcB	Vehicle	DSS	0	0	1	2	2	2
	78	M	6 weeks	ComplexMcB	Vehicle	DSS	0	1	1	1	2	3
27	79	M	6 weeks	ComplexMcB	Vehicle	DSS	0	1	1	2	2	2
	80	M	6 weeks	ComplexMcB	Vehicle	DSS	0	1	1	1	2	3
	81	M	6 weeks	ComplexMcB	Vehicle	DSS	0	1	1	2	1	2
28	82	M	6 weeks	ComplexMcB	Vehicle	DSS	0	1	2	2	2	3
	83	M	6 weeks	ComplexMcB	Vehicle	DSS	0	1	2	2	2	4
	84	M	6 weeks	ComplexMcB	Vehicle	DSS	0	1	3	3	3	3
29	85	M	6 weeks	ComplexMcB	Beta	DSS	0	3	2	2	1	7
	86	M	6 weeks	ComplexMcB	Beta	DSS	0	2	3	3	2	4
	87	M	6 weeks	ComplexMcB	Beta	DSS	0	1	1	1	0	3
30	88	M	6 weeks	ComplexMcB	Beta	DSS	0	1	1	1	3	4
	89	M	6 weeks	ComplexMcB	Beta	DSS	0	1	1	1	2	2
	90	M	6 weeks	ComplexMcB	Beta	DSS	0	1	1	1	2	4
31	91	M	6 weeks	ComplexMcB	Beta	DSS	0	0	2	1	3	4
	92	M	6 weeks	ComplexMcB	Beta	DSS	0	1	1	1	2	4
	93	M	6 weeks	ComplexMcB	Beta	DSS	0	1	0	1	3	5
32	94	M	6 weeks	ComplexMcB	Beta	DSS	0	0	0	1	1	3
	95	M	6 weeks	ComplexMcB	Beta	DSS	0	2	1	2	1	4
	96	M	6 weeks	ComplexMcB	Beta	DSS	0	2	0	2	3	4

## Sheet: Necropsy
Cage_ID	Mouse_ID	Sex	Arrival	Diet	Treatment	Drink	Spleen	Cecum	Colon	Colon length	Colon length w/o carnoy	SI Length	SpleenToBW	CecumToBW	ColonToBW	ColonIndex
1	1	M	6 weeks	ComplexReference	Vehicle	Water	0.083	0.267	0.12	8.3	7.8	36.9	0.321705	1.03488	0.465116	15.3846
	2	M	6 weeks	ComplexReference	Vehicle	Water	0.074	0.282	0.124	7.9	7.5	36.2	0.282443	1.07634	0.473282	16.5333
	3	M	6 weeks	ComplexReference	Vehicle	Water	0.065	0.177	0.133	8	7.5	35.5	0.245283	0.667925	0.501887	17.7333
2	4	M	6 weeks	ComplexReference	Vehicle	Water	0.102	0.305	0.114	8.5	8	32.5	0.398437	1.19141	0.445312	14.25
	5	M	6 weeks	ComplexReference	Vehicle	Water	0.079	0.219	0.113	8	7.5	36.4	0.307393	0.85214	0.439689	15.0667
	6	M	6 weeks	ComplexReference	Vehicle	Water	0.061	0.213	0.118	8.4	7.8	35.2	0.234615	0.819231	0.453846	15.1282
3	7	M	6 weeks	ComplexReference	Vehicle	Water	0.057	0.255	0.117	7.5	7	38.1	0.22619	1.0119	0.464286	16.7143
	8	M	6 weeks	ComplexReference	Vehicle	Water	0.082	0.228	0.133	7.7	7.4	37.5	0.303704	0.844444	0.492593	17.973
	9	M	6 weeks	ComplexReference	Vehicle	Water	0.072	0.29	0.122	7.4	6.8	37.2	0.266667	1.07407	0.451852	17.9412
4	10	M	6 weeks	ComplexReference	Vehicle	Water	0.071	0.259	0.118	7.5	7	35.7	0.262963	0.959259	0.437037	16.8571
	11	M	6 weeks	ComplexReference	Vehicle	Water	0.067	0.191	0.122	7.7	7.1	36.4	0.283898	0.809322	0.516949	17.1831
	12	M	6 weeks	ComplexReference	Vehicle	Water	0.065	0.231	0.141	7.4	7	36.8	0.251938	0.895349	0.546512	20.1429
5	13	M	6 weeks	ComplexReference	Beta	Water	0.093	0.242	0.126	8.1	7.6	37.4	0.329787	0.858156	0.446809	16.5789
	14	M	6 weeks	ComplexReference	Beta	Water	0.074	0.217	0.133	7.6	7	37.5	0.256944	0.753472	0.461806	19
	15	M	6 weeks	ComplexReference	Beta	Water	0.08	0.254	0.11	7.4	7	35.7	0.305344	0.969466	0.419847	15.7143
6	16	M	6 weeks	ComplexReference	Beta	Water	0.072	0.274	0.119	7.6	7.4	37	0.293878	1.11837	0.485714	16.0811
	17	M	6 weeks	ComplexReference	Beta	Water	0.073	0.273	0.135	7.7	7.2	37.6	0.284047	1.06226	0.525292	18.75
	18	M	6 weeks	ComplexReference	Beta	Water	0.054	0.275	0.138	8.1	7.6	35.9	0.216	1.1	0.552	18.1579
7	19	M	6 weeks	ComplexReference	Beta	Water	0.079	0.23	0.126	7.5	7	38.3	0.298113	0.867925	0.475472	18
	20	M	6 weeks	ComplexReference	Beta	Water	0.064	0.255	0.114	7.6	7.1	37.9	0.252964	1.00791	0.450593	16.0563
	21	M	6 weeks	ComplexReference	Beta	Water	0.097	0.161	0.114	7.4	7	35.9	0.366038	0.607547	0.430189	16.2857
8	22	M	6 weeks	ComplexReference	Beta	Water	0.085	0.271	0.118	7.3	6.9	38.4	0.326923	1.04231	0.453846	17.1014
	23	M	6 weeks	ComplexReference	Beta	Water	0.095	0.258	0.129	7.7	7.1	39.3	0.372549	1.01176	0.505882	18.169
	24	M	6 weeks	ComplexReference	Beta	Water	0.061	0.221	0.109	7.2	6.7	35.4	0.258475	0.936441	0.461864	16.2687
9	25	M	6 weeks	ComplexReference	Vehicle	DSS	0.07	0.241	0.122	5.7	5.2	33.8	0.309735	1.06637	0.539823	23.4615
	26	M	6 weeks	ComplexReference	Vehicle	DSS	0.078	0.293	0.133	6.1	5.6	36.7	0.337662	1.2684	0.575758	23.75
	27	M	6 weeks	ComplexReference	Vehicle	DSS	0.242	0.315	0.132	5.1	4.6	38.1	1.02979	1.34043	0.561702	28.6957
10	28	M	6 weeks	ComplexReference	Vehicle	DSS	0.087	0.277	0.127	5.9	5.4	37.2	0.3625	1.15417	0.529167	23.5185
	29	M	6 weeks	ComplexReference	Vehicle	DSS	0.07	0.169	0.14	5.7	5.2	34.1	0.321101	0.775229	0.642202	26.9231
	30	M	6 weeks	ComplexReference	Vehicle	DSS	0.073	0.206	0.125	5.9	5.4	35.3	0.325893	0.919643	0.558036	23.1481
11	31	M	6 weeks	ComplexReference	Vehicle	DSS	0.114	0.363	0.137	5.3	4.8	35.7	0.463415	1.47561	0.556911	28.5417
	32	M	6 weeks	ComplexReference	Vehicle	DSS	0.126	0.278	0.133	5.3	4.9	31.5	0.538462	1.18803	0.568376	27.1429
	33	M	6 weeks	ComplexReference	Vehicle	DSS	0.081	0.343	0.127	5.8	5.3	32.3	0.3361	1.42324	0.526971	23.9623
12	34	M	6 weeks	ComplexReference	Vehicle	DSS	0.105	0.372	0.147	5.6	5	36.3	0.421687	1.49398	0.590361	29.4
	35	M	6 weeks	ComplexReference	Vehicle	DSS	0.078	0.347	0.129	6.2	5.7	38.1	0.312	1.388	0.516	22.6316
	36	M	6 weeks	ComplexReference	Vehicle	DSS	0.092	0.311	0.139	6.6	6	36.5	0.356589	1.20543	0.53876	23.1667
13	37	M	6 weeks	ComplexReference	Beta	DSS	0.072	0.373	0.141	5.8	5.3	38.2	0.301255	1.56067	0.589958	26.6038
	38	M	6 weeks	ComplexReference	Beta	DSS	0.101	0.326	0.155	5.7	5.2	37.3	0.404	1.304	0.62	29.8077
	39	M	6 weeks	ComplexReference	Beta	DSS	0.131	0.347	0.143	6.4	5.8	37.4	0.496212	1.31439	0.541667	24.6552
14	40	M	6 weeks	ComplexReference	Beta	DSS	0.078	0.287	0.161	6.3	5.7	35.8	0.314516	1.15726	0.649194	28.2456
	41	M	6 weeks	ComplexReference	Beta	DSS	0.087	0.318	0.122	6.1	5.6	37.7	0.341176	1.24706	0.478431	21.7857
	42	M	6 weeks	ComplexReference	Beta	DSS	0.116	0.201	0.116	5.1	4.6	33.8	0.539535	0.934884	0.539535	25.2174
15	43	M	6 weeks	ComplexReference	Beta	DSS	0.08	0.373	0.142	6.5	6	35.6	0.306513	1.42912	0.544061	23.6667
	44	M	6 weeks	ComplexReference	Beta	DSS	0.07	0.299	0.121	6.1	5.5	34.8	0.292887	1.25105	0.506276	22
	45	M	6 weeks	ComplexReference	Beta	DSS	0.061	0.284	0.119	7	6.4	35.4	0.244	1.136	0.476	18.5938
16	46	M	6 weeks	ComplexReference	Beta	DSS	0.086	0.308	0.127	6.7	6.2	38.7	0.320896	1.14925	0.473881	20.4839
	47	M	6 weeks	ComplexReference	Beta	DSS	0.071	0.277	0.105	6.3	5.7	36.9	0.273077	1.06538	0.403846	18.4211
	48	M	6 weeks	ComplexReference	Beta	DSS	0.089	0.362	0.14	6.4	5.9	34.3	0.350394	1.4252	0.551181	23.7288
17	49	M	6 weeks	ComplexMcB	Vehicle	Water	0.104	0.381	0.136	9.3	8.7	41.5	0.435146	1.59414	0.569038	15.6322
	50	M	6 weeks	ComplexMcB	Vehicle	Water	0.144	0.344	0.137	8.9	8.3	43	0.553846	1.32308	0.526923	16.506
	51	M	6 weeks	ComplexMcB	Vehicle	Water	0.077	0.237	0.136	9.2	8.7	40.6	0.29845	0.918605	0.527132	15.6322
18	52	M	6 weeks	ComplexMcB	Vehicle	Water	0.106	0.28	0.138	9.3	8.8	41.4	0.381295	1.00719	0.496403	15.6818
	53	M	6 weeks	ComplexMcB	Vehicle	Water	0.094	0.371	0.129	8.8	8.2	43.1	0.350746	1.38433	0.481343	15.7317
	54	M	6 weeks	ComplexMcB	Vehicle	Water	0.112	0.35	0.143	9.2	8.6	41.4	0.444444	1.38889	0.56746	16.6279
19	55	M	6 weeks	ComplexMcB	Vehicle	Water	0.084	0.478	0.137	9.2	8.7	40.3	0.306569	1.74453	0.5	15.7471
	56	M	6 weeks	ComplexMcB	Vehicle	Water	0.12	0.328	0.16	8.8	8.3	43.4	0.436364	1.19273	0.581818	19.2771
	57	M	6 weeks	ComplexMcB	Vehicle	Water	0.081	0.309	0.148	8.5	8	38.2	0.316406	1.20703	0.578125	18.5
20	58	M	6 weeks	ComplexMcB	Vehicle	Water	0.092	0.437	0.145	8.9	8.4	41.2	0.343284	1.6306	0.541045	17.2619
	59	M	6 weeks	ComplexMcB	Vehicle	Water	0.079	0.381	0.127	8.6	8	42.8	0.296992	1.43233	0.477444	15.875
	60	M	6 weeks	ComplexMcB	Vehicle	Water	0.087	0.283	0.118	8.4	7.9	40.2	0.337209	1.0969	0.457364	14.9367
21	61	M	6 weeks	ComplexMcB	Beta	Water	0.093	0.376	0.144	9.5	9	41	0.338182	1.36727	0.523636	16
	62	M	6 weeks	ComplexMcB	Beta	Water	0.075	0.288	0.142	8.8	8.2	38.2	0.295276	1.13386	0.559055	17.3171
	63	M	6 weeks	ComplexMcB	Beta	Water	0.085	0.303	0.122	7.8	7.3	33.1	0.34413	1.22672	0.493927	16.7123
22	64	M	6 weeks	ComplexMcB	Beta	Water	0.077	0.31	0.138	8.6	8	39.4	0.295019	1.18774	0.528736	17.25
	65	M	6 weeks	ComplexMcB	Beta	Water	0.071	0.257	0.132	7.6	7.1	36.8	0.300847	1.08898	0.559322	18.5915
	66	M	6 weeks	ComplexMcB	Beta	Water	0.05	0.359	0.13	8	7.5	38.1	0.205761	1.47737	0.534979	17.3333
23	67	M	6 weeks	ComplexMcB	Beta	Water	0.08	0.32	0.117	7.9	7.4	37.2	0.314961	1.25984	0.46063	15.8108
	68	M	6 weeks	ComplexMcB	Beta	Water	0.102	0.261	0.123	8.6	8	39.1	0.425	1.0875	0.5125	15.375
	69	M	6 weeks	ComplexMcB	Beta	Water	0.084	0.291	0.131	8.3	7.8	38.9	0.316981	1.09811	0.49434	16.7949
24	70	M	6 weeks	ComplexMcB	Beta	Water	0.083	0.361	0.118	7.8	7.3	39.6	0.319231	1.38846	0.453846	16.1644
	71	M	6 weeks	ComplexMcB	Beta	Water	0.084	0.321	0.127	7.8	7.2	37.7	0.330709	1.26378	0.5	17.6389
	72	M	6 weeks	ComplexMcB	Beta	Water	0.075	0.326	0.125	8.2	7.7	39.2	0.3	1.304	0.5	16.2338
25	73	M	6 weeks	ComplexMcB	Vehicle	DSS	0.1	0.432	0.126	8.3	7.8	40.5	0.380228	1.64259	0.479087	16.1538
	74	M	6 weeks	ComplexMcB	Vehicle	DSS	0.075	0.401	0.114	7.8	7.2	39	0.306122	1.63673	0.465306	15.8333
	75	M	6 weeks	ComplexMcB	Vehicle	DSS	0.076	0.506	0.121	8.4	7.8	41.2	0.284644	1.89513	0.453184	15.5128
26	76	M	6 weeks	ComplexMcB	Vehicle	DSS	0.091	0.541	0.133	7.3	6.8	40.6	0.325	1.93214	0.475	19.5588
	77	M	6 weeks	ComplexMcB	Vehicle	DSS	0.071	0.372	0.12	7.7	7.2	41.5	0.28629	1.5	0.483871	16.6667
	78	M	6 weeks	ComplexMcB	Vehicle	DSS	0.105	0.358	0.158	8.3	7.8	41.8	0.375	1.27857	0.564286	20.2564
27	79	M	6 weeks	ComplexMcB	Vehicle	DSS	0.096	0.689	0.14	7.8	7.3	40.6	0.333333	2.39236	0.486111	19.1781
	80	M	6 weeks	ComplexMcB	Vehicle	DSS	0.08	0.542	0.135	7.3	6.8	39.3	0.32	2.168	0.54	19.8529
	81	M	6 weeks	ComplexMcB	Vehicle	DSS	0.101	0.483	0.123	7.9	7.4	39.7	0.365942	1.75	0.445652	16.6216
28	82	M	6 weeks	ComplexMcB	Vehicle	DSS	0.157	0.433	0.124	7.8	7.3	40.4	0.588015	1.62172	29.2135	16.9863
	83	M	6 weeks	ComplexMcB	Vehicle	DSS	0.107	0.416	0.125	7.9	7.4	40.2	0.396296	1.54074	29.2593	16.8919
	84	M	6 weeks	ComplexMcB	Vehicle	DSS	0.081	0.457	0.127	7.6	7	40.6	0.326613	1.84274	30.6452	18.1429
29	85	M	6 weeks	ComplexMcB	Beta	DSS	0.116	0.327	0.123	6.5	6	37.8	0.483333	1.3625	0.5125	20.5
	86	M	6 weeks	ComplexMcB	Beta	DSS	0.097	0.423	0.108	6.4	6.4	40.8	0.359259	1.56667	0.4	16.875
	87	M	6 weeks	ComplexMcB	Beta	DSS	0.086	0.446	0.14	7.6	7	39.1	0.345382	1.79116	0.562249	20
30	88	M	6 weeks	ComplexMcB	Beta	DSS	0.139	0.663	0.169	6.5	6	37.4	0.503623	2.40217	0.612319	28.1667
	89	M	6 weeks	ComplexMcB	Beta	DSS	0.105	0.67	0.11	6.5	6	38.1	0.390335	2.49071	0.408922	18.3333
	90	M	6 weeks	ComplexMcB	Beta	DSS	0.093	0.39	0.137	7.4	6.9	36.7	0.378049	1.58537	0.556911	19.8551
31	91	M	6 weeks	ComplexMcB	Beta	DSS	0.081	0.52	0.119	6.9	6.4	37.6	0.311538	2	0.457692	18.5938
	92	M	6 weeks	ComplexMcB	Beta	DSS	0.066	0.32	0.105	6.8	6.4	36.2	0.278481	1.35021	0.443038	16.4062
	93	M	6 weeks	ComplexMcB	Beta	DSS	0.078	0.438	0.148	7.1	6.5	38.4	0.314516	1.76613	0.596774	22.7692
32	94	M	6 weeks	ComplexMcB	Beta	DSS	0.08	0.444	0.131	6.7	6.2	35.9	0.314961	1.74803	0.515748	21.129
	95	M	6 weeks	ComplexMcB	Beta	DSS	0.078	0.625	0.165	7	6.5	40.5	0.302326	2.42248	0.639535	25.3846
	96	M	6 weeks	ComplexMcB	Beta	DSS	0.077	0.668	0.143	7.1	6.5	38.7	0.305556	2.65079	0.56746	22

## Sheet: DAS Calculation
							BW Score							Presence of blood in feces							Fecal consistency							Total
Cage_ID	Mouse_ID	Sex	Arrival	Diet	Treatment	Drink	D0	D1	D2	D3	D4	D5		D0	D1	D2	D3	D4	D5		D0	D1	D2	D3	D4	D5		D0	D1	D2	D3	D4	D5
1	1	M	6 weeks	ComplexReference	Vehicle	Water	0	0	0	0	0	0		0	0	0	0	0	0		0	0	0	0	0	0		0	0	0	0	0	0
	2	M	6 weeks	ComplexReference	Vehicle	Water	0	0	0	0	0	0		0	0	0	0	0	0		0	0	0	0	0	0		0	0	0	0	0	0
	3	M	6 weeks	ComplexReference	Vehicle	Water	0	1	0	0	0	0		0	0	0	0	0	0		0	0	0	0	0	0		0	1	0	0	0	0
2	4	M	6 weeks	ComplexReference	Vehicle	Water	0	0	0	0	0	0		0	0	0	0	0	0		0	0	0	0	0	0		0	0	0	0	0	0
	5	M	6 weeks	ComplexReference	Vehicle	Water	0	0	0	0	0	0		0	0	0	0	0	0		0	0	0	0	0	0		0	0	0	0	0	0
	6	M	6 weeks	ComplexReference	Vehicle	Water	0	0	0	0	0	0		0	0	0	0	0	0		0	0	0	0	0	0		0	0	0	0	0	0
3	7	M	6 weeks	ComplexReference	Vehicle	Water	0	0	0	0	0	0		0	0	0	0	0	0		0	0	0	0	0	0		0	0	0	0	0	0
	8	M	6 weeks	ComplexReference	Vehicle	Water	0	1	3	0	0	0		0	0	0	0	0	0		0	0	0	0	0	0		0	1	3	0	0	0
	9	M	6 weeks	ComplexReference	Vehicle	Water	0	0	0	0	0	0		0	0	0	0	0	0		0	0	0	0	0	0		0	0	0	0	0	0
4	10	M	6 weeks	ComplexReference	Vehicle	Water	0	0	0	0	0	0		0	0	0	0	0	0		0	0	0	0	1	0		0	0	0	0	1	0
	11	M	6 weeks	ComplexReference	Vehicle	Water	0	0	0	0	0	0		0	0	0	0	0	0		0	0	0	0	0	0		0	0	0	0	0	0
	12	M	6 weeks	ComplexReference	Vehicle	Water	0	0	0	0	0	0		0	0	0	0	0	0		0	0	0	0	0	0		0	0	0	0	0	0
5	13	M	6 weeks	ComplexReference	Beta	Water	0	0	0	0	0	0		0	0	0	0	0	0		0	0	0	0	0	0		0	0	0	0	0	0
	14	M	6 weeks	ComplexReference	Beta	Water	0	0	0	0	0	0		0	0	0	0	0	0		0	0	0	0	0	0		0	0	0	0	0	0
	15	M	6 weeks	ComplexReference	Beta	Water	0	0	0	0	0	0		0	0	0	0	0	0		0	0	0	0	0	0		0	0	0	0	0	0
6	16	M	6 weeks	ComplexReference	Beta	Water	0	0	0	0	0	0		0	0	0	0	0	0		0	0	0	0	0	0		0	0	0	0	0	0
	17	M	6 weeks	ComplexReference	Beta	Water	0	0	0	0	0	0		0	0	0	0	0	0		0	0	0	0	0	0		0	0	0	0	0	0
	18	M	6 weeks	ComplexReference	Beta	Water	0	2	2	2	1	1		0	0	0	0	0	0		0	0	0	0	0	1		0	2	2	2	1	2
7	19	M	6 weeks	ComplexReference	Beta	Water	0	0	0	0	0	0		0	0	0	0	0	0		0	0	0	0	0	0		0	0	0	0	0	0
	20	M	6 weeks	ComplexReference	Beta	Water	0	0	0	1	2	2		0	0	0	0	0	0		0	0	1	0	0	0		0	0	1	1	2	2
	21	M	6 weeks	ComplexReference	Beta	Water	0	0	0	0	0	0		0	0	0	0	0	0		0	0	0	0	0	0		0	0	0	0	0	0
8	22	M	6 weeks	ComplexReference	Beta	Water	0	0	0	0	0	0		0	0	0	0	0	0		0	0	0	0	1	1		0	0	0	0	1	1
	23	M	6 weeks	ComplexReference	Beta	Water	0	0	0	0	0	0		0	0	0	0	0	0		0	0	0	0	0	0		0	0	0	0	0	0
	24	M	6 weeks	ComplexReference	Beta	Water	0	0	0	0	0	0		0	0	0	0	0	0		0	0	1	0	0	0		0	0	1	0	0	0
9	25	M	6 weeks	ComplexReference	Vehicle	DSS	0	0	1	0	0	1		0	0	0	3	3	4		0	2	1	2	2	2		0	2	2	5	5	7
	26	M	6 weeks	ComplexReference	Vehicle	DSS	0	0	0	0	0	1		0	0	0	1	2	3		0	2	1	2	2	1		0	2	1	3	4	5
	27	M	6 weeks	ComplexReference	Vehicle	DSS	0	0	1	1	1	3		0	0	1	1	2	3		0	2	2	2	2	2		0	2	4	4	5	8
10	28	M	6 weeks	ComplexReference	Vehicle	DSS	0	0	0	0	0	1		0	0	0	0	0	3		0	1	2	1	2	1		0	1	2	1	2	5
	29	M	6 weeks	ComplexReference	Vehicle	DSS	0	0	0	0	1	2		0	0	0	0	1	2		0	2	2	1	1	2		0	2	2	1	3	6
	30	M	6 weeks	ComplexReference	Vehicle	DSS	0	0	0	0	1	2		0	0	1	1	0	2		0	2	1	1	2	2		0	2	2	2	3	6
11	31	M	6 weeks	ComplexReference	Vehicle	DSS	0	0	1	0	0	1		0	0	0	1	1	2		0	2	2	2	2	2		0	2	3	3	3	5
	32	M	6 weeks	ComplexReference	Vehicle	DSS	0	0	0	0	1	2		0	1	2	1	1	3		0	1	2	2	2	4		0	2	4	3	4	9
	33	M	6 weeks	ComplexReference	Vehicle	DSS	0	0	0	1	1	2		0	0	1	0	1	2		0	1	1	2	2	2		0	1	2	3	4	6
12	34	M	6 weeks	ComplexReference	Vehicle	DSS	0	1	1	0	1	1		0	0	0	0	1	2		0	1	2	2	1	4		0	2	3	2	3	7
	35	M	6 weeks	ComplexReference	Vehicle	DSS	0	0	1	0	0	0		0	0	0	0	1	2		0	1	1	2	2	2		0	1	2	2	3	4
	36	M	6 weeks	ComplexReference	Vehicle	DSS	0	0	0	1	0	1		0	0	0	0	1	2		0	1	2	2	2	2		0	1	2	3	3	5
13	37	M	6 weeks	ComplexReference	Beta	DSS	0	0	0	0	0	0		0	0	0	0	0	3		0	1	1	1	2	2		0	1	1	1	2	5
	38	M	6 weeks	ComplexReference	Beta	DSS	0	0	0	0	0	1		0	0	1	2	2	3		0	1	1	2	2	4		0	1	2	4	4	8
	39	M	6 weeks	ComplexReference	Beta	DSS	0	0	1	0	0	1		0	1	0	1	0	2		0	1	2	2	1	1		0	2	3	3	1	4
14	40	M	6 weeks	ComplexReference	Beta	DSS	0	0	0	0	0	1		0	0	0	1	0	2		0	1	1	1	0	2		0	1	1	2	0	5
	41	M	6 weeks	ComplexReference	Beta	DSS	0	0	0	0	0	1		0	0	0	0	0	3		0	1	1	1	0	2		0	1	1	1	0	6
	42	M	6 weeks	ComplexReference	Beta	DSS	0	0	1	2	2	3		0	0	3	3	3	4		0	2	2	1	2	4		0	2	6	6	7	11
15	43	M	6 weeks	ComplexReference	Beta	DSS	0	0	0	0	0	0		0	0	1	0	1	2		0	1	1	2	1	1		0	1	2	2	2	3
	44	M	6 weeks	ComplexReference	Beta	DSS	0	0	0	0	0	0		0	0	0	0	1	1		0	2	1	2	0	1		0	2	1	2	1	2
	45	M	6 weeks	ComplexReference	Beta	DSS	0	1	0	1	0	1		0	0	0	0	1	2		0	1	1	1	1	1		0	2	1	2	2	4
16	46	M	6 weeks	ComplexReference	Beta	DSS	0	0	0	0	0	1		0	0	0	0	0	2		0	1	2	2	2	2		0	1	2	2	2	5
	47	M	6 weeks	ComplexReference	Beta	DSS	0	0	0	0	0	0		0	0	0	0	1	2		0	2	1	2	2	2		0	2	1	2	3	4
	48	M	6 weeks	ComplexReference	Beta	DSS	0	0	0	0	0	1		0	0	0	0	1	2		0	1	2	2	2	2		0	1	2	2	3	5
17	49	M	6 weeks	ComplexMcB	Vehicle	Water	0	0	0	0	0	0		0	0	0	0	0	0		0	0	0	0	0	0		0	0	0	0	0	0
	50	M	6 weeks	ComplexMcB	Vehicle	Water	0	0	0	0	0	0		0	0	0	0	0	0		0	0	0	0	0	0		0	0	0	0	0	0
	51	M	6 weeks	ComplexMcB	Vehicle	Water	0	0	1	0	0	0		0	0	0	0	0	0		0	0	0	0	0	0		0	0	1	0	0	0
18	52	M	6 weeks	ComplexMcB	Vehicle	Water	0	0	0	0	0	0		0	0	0	0	0	0		0	0	0	0	0	0		0	0	0	0	0	0
	53	M	6 weeks	ComplexMcB	Vehicle	Water	0	0	0	0	0	0		0	0	0	0	0	0		0	0	0	0	0	0		0	0	0	0	0	0
	54	M	6 weeks	ComplexMcB	Vehicle	Water	0	0	0	0	0	0		0	0	0	0	0	0		0	0	0	0	0	0		0	0	0	0	0	0
19	55	M	6 weeks	ComplexMcB	Vehicle	Water	0	0	0	0	0	0		0	0	0	0	0	0		0	0	0	0	1	0		0	0	0	0	1	0
	56	M	6 weeks	ComplexMcB	Vehicle	Water	0	0	0	0	0	0		0	0	0	0	0	0		0	0	0	0	1	0		0	0	0	0	1	0
	57	M	6 weeks	ComplexMcB	Vehicle	Water	0	0	0	0	0	0		0	0	0	0	0	0		0	0	0	0	1	1		0	0	0	0	1	1
20	58	M	6 weeks	ComplexMcB	Vehicle	Water	0	0	0	0	0	0		0	0	0	0	0	0		0	0	1	0	1	1		0	0	1	0	1	1
	59	M	6 weeks	ComplexMcB	Vehicle	Water	0	0	0	0	0	0		0	0	0	0	0	0		0	0	0	0	0	0		0	0	0	0	0	0
	60	M	6 weeks	ComplexMcB	Vehicle	Water	0	0	0	0	0	0		0	0	0	0	0	0		0	0	0	0	0	0		0	0	0	0	0	0
21	61	M	6 weeks	ComplexMcB	Beta	Water	0	0	0	0	0	0		0	0	0	0	0	0		0	0	0	0	0	0		0	0	0	0	0	0
	62	M	6 weeks	ComplexMcB	Beta	Water	0	0	0	0	0	0		0	0	0	0	0	0		0	0	0	0	0	0		0	0	0	0	0	0
	63	M	6 weeks	ComplexMcB	Beta	Water	0	1	0	0	0	0		0	0	0	0	0	0		0	0	0	0	0	0		0	1	0	0	0	0
22	64	M	6 weeks	ComplexMcB	Beta	Water	0	0	0	0	0	0		0	0	0	0	0	0		0	0	0	1	0	0		0	0	0	1	0	0
	65	M	6 weeks	ComplexMcB	Beta	Water	0	0	0	0	0	0		0	0	0	0	0	0		0	0	0	0	1	0		0	0	0	0	1	0
	66	M	6 weeks	ComplexMcB	Beta	Water	0	0	0	0	0	0		0	0	0	0	0	0		0	0	0	1	0	0		0	0	0	1	0	0
23	67	M	6 weeks	ComplexMcB	Beta	Water	0	0	0	0	0	0		0	0	0	0	0	0		0	0	0	0	1	0		0	0	0	0	1	0
	68	M	6 weeks	ComplexMcB	Beta	Water	0	0	0	0	0	0		0	0	0	0	0	0		0	0	1	0	0	0		0	0	1	0	0	0
	69	M	6 weeks	ComplexMcB	Beta	Water	0	0	0	0	0	0		0	0	0	0	0	0		0	0	0	0	0	1		0	0	0	0	0	1
24	70	M	6 weeks	ComplexMcB	Beta	Water	0	1	0	0	0	0		0	0	0	0	0	0		0	0	0	0	0	0		0	1	0	0	0	0
	71	M	6 weeks	ComplexMcB	Beta	Water	0	1	0	0	1	0		0	0	0	0	0	0		0	1	0	0	1	0		0	2	0	0	2	0
	72	M	6 weeks	ComplexMcB	Beta	Water	0	0	0	0	0	0		0	0	0	0	0	0		0	0	0	0	0	0		0	0	0	0	0	0
25	73	M	6 weeks	ComplexMcB	Vehicle	DSS	0	0	0	0	0	0		0	0	0	0	0	0		0	0	0	0	0	1		0	0	0	0	0	1
	74	M	6 weeks	ComplexMcB	Vehicle	DSS	0	0	0	1	0	0		0	0	0	0	0	0		0	1	1	1	1	2		0	1	1	2	1	2
	75	M	6 weeks	ComplexMcB	Vehicle	DSS	0	0	0	0	0	0		0	0	0	0	0	0		0	1	1	0	0	1		0	1	1	0	0	1
26	76	M	6 weeks	ComplexMcB	Vehicle	DSS	0	1	0	0	0	0		0	0	0	0	0	1		0	0	1	1	2	2		0	1	1	1	2	3
	77	M	6 weeks	ComplexMcB	Vehicle	DSS	0	0	0	1	1	1		0	0	0	0	0	0		0	0	1	1	1	1		0	0	1	2	2	2
	78	M	6 weeks	ComplexMcB	Vehicle	DSS	0	0	0	0	0	0		0	0	0	0	0	1		0	1	1	1	2	2		0	1	1	1	2	3
27	79	M	6 weeks	ComplexMcB	Vehicle	DSS	0	0	0	0	0	0		0	0	0	0	0	1		0	1	1	2	2	1		0	1	1	2	2	2
	80	M	6 weeks	ComplexMcB	Vehicle	DSS	0	0	0	0	0	1		0	0	0	0	1	1		0	1	1	1	1	1		0	1	1	1	2	3
	81	M	6 weeks	ComplexMcB	Vehicle	DSS	0	0	0	0	0	0		0	0	0	0	0	1		0	1	1	2	1	1		0	1	1	2	1	2
28	82	M	6 weeks	ComplexMcB	Vehicle	DSS	0	0	0	0	0	0		0	0	0	0	0	1		0	1	2	2	2	2		0	1	2	2	2	3
	83	M	6 weeks	ComplexMcB	Vehicle	DSS	0	0	0	0	0	0		0	0	0	0	0	2		0	1	2	2	2	2		0	1	2	2	2	4
	84	M	6 weeks	ComplexMcB	Vehicle	DSS	0	0	1	1	1	0		0	0	0	0	0	1		0	1	2	2	2	2		0	1	3	3	3	3
29	85	M	6 weeks	ComplexMcB	Beta	DSS	0	2	1	1	0	1		0	0	0	0	0	2		0	1	1	1	1	4		0	3	2	2	1	7
	86	M	6 weeks	ComplexMcB	Beta	DSS	0	1	2	2	1	1		0	0	0	0	0	1		0	1	1	1	1	2		0	2	3	3	2	4
	87	M	6 weeks	ComplexMcB	Beta	DSS	0	0	0	0	0	1		0	0	0	0	0	1		0	1	1	1	0	1		0	1	1	1	0	3
30	88	M	6 weeks	ComplexMcB	Beta	DSS	0	0	0	0	0	0		0	0	0	0	1	2		0	1	1	1	2	2		0	1	1	1	3	4
	89	M	6 weeks	ComplexMcB	Beta	DSS	0	0	0	0	0	0		0	0	0	0	0	0		0	1	1	1	2	2		0	1	1	1	2	2
	90	M	6 weeks	ComplexMcB	Beta	DSS	0	0	0	0	0	0		0	0	0	0	0	2		0	1	1	1	2	2		0	1	1	1	2	4
31	91	M	6 weeks	ComplexMcB	Beta	DSS	0	0	1	1	1	1		0	0	0	0	1	2		0	0	1	0	1	1		0	0	2	1	3	4
	92	M	6 weeks	ComplexMcB	Beta	DSS	0	0	0	1	0	1		0	0	0	0	1	2		0	1	1	0	1	1		0	1	1	1	2	4
	93	M	6 weeks	ComplexMcB	Beta	DSS	0	0	0	0	0	1		0	0	0	1	1	2		0	1	0	0	2	2		0	1	0	1	3	5
32	94	M	6 weeks	ComplexMcB	Beta	DSS	0	0	0	0	0	1		0	0	0	0	0	1		0	0	0	1	1	1		0	0	0	1	1	3
	95	M	6 weeks	ComplexMcB	Beta	DSS	0	0	0	0	0	0		0	1	0	0	0	2		0	1	1	2	1	2		0	2	1	2	1	4
	96	M	6 weeks	ComplexMcB	Beta	DSS	0	0	0	0	0	0		0	1	0	0	1	2		0	1	0	2	2	2		0	2	0	2	3	4
